# Supplementary material for: Single-cell RNA-seq reveals changes in cell cycle and differentiation programs upon aging of hematopoietic stem cells
Source: HighWire-hosted journal article supplement (doi:10.1101/gr.192237.115), 2015-10-01
Supplement: Supplemental_Methods.docx [file Supplemental_Methods.docx]

**Supplementary Methods**

**Isolation of hematopoietic stem and progenitor cells**

Young (2-3 months old) female C57BL/6 and DBA/2 mice were purchased from Taconic and The Jackson Laboratory respectively. Old female C57BL/6 (>22 months old) and DBA/2 (20 months old) mice were obtained from the National Institute of Aging Mice were housed in the Boston Children’s Hospital Animal facility (IACUC 1012-104-15).

Total bone marrow (BM) cells were isolated from femur, tibia, pelvis and spine. BM cells were subjected to erythrocyte lysis using BD Pharm Lyse hypotonic lysis buffer (BD Biosciences; 555899). Prior to fluorescence-activated cell sorting, erythrocyte lysed BM cells were enriched for hematopoietic progenitor cells using CD117 coupled magnetic beads (Miltenyi Biotech; 130-091-224) with an AutoMACS Pro automated cell separator. CD117 enriched cells were stained with eFluor450 coupled lineage antibodies [CD11b (M1/70), Gr1 (RB6-8C5), CD45R (RA3-6B2), CD3e (145-2C11), TER119], CD117-APC (2B8), Sca1-PE (D7), CD48-APC-Cy7 (HM48-1) and CD150-PE-Cy7 (TC15-12F12.2), all from eBioscience and Biolegend.

Fluorescence-activated cell sorting was performed with a BD FACS AriaII cell sorter. LT-HSCs (LSK CD150+CD48-), ST-HSCs (LSK CD150-CD48-), and MPPs (LSK CD150-CD48+) were first sorted into 1.5ml Eppendorf tubes using a 70μm nozzle at 10k-15k cells per second. Then, cells were re-sorted as single cells into 96-well plates containing 5l of lysis buffer (TCL lysis buffer (Qiagen) supplemented with 1% (v/v) 2-mercaptoethanol (Qiagen)) using an 80μm nozzle at 50-100 cells per second. 96-well plates were centrifuged for 1min at 2,000 rpm, flash frozen on dry ice and stored at -80°C. For populations, cells were sorted directly into lysis buffer and RNA extracted using PrepEase (Affymetrix).

**Flow cytometry**

Bone marrow (BM) cells were harvested from long bones (2 tibias and 2 femurs) by flushing with staining media (DPBS+2%FCS), and filtered through a 70m cell strainer. BM erythrocytes were depleted using ACK lysis buffer (Lonza). To identify hematopoietic stem and progenitor cells (HSPCs), BM cells were stained with biotinylated lineage marker mix (Lin: Anti-CD3e (17-A2), Anti-CD4 (L3T4), anti-CD8 (53-6.72), anti-B220 (RA3-6B2), anti-TER-119, Gr-1 (RB6-8C5), anti-Mac-1 (M1/70), and followed by Streptavidin PE-Texas Red. Cells were further stained with anti-c-Kit (2B8), anti-CD150 (TC15-12F12.2); Biolegend); anti-Sca-1 (E13-161.7), anti-CD34 (RAM34), anti-CD48 (HM48-1) (eBiosciences); anti-Flt3 (A2F10.1) (BD). For cell cycle staining, we used BD Cytofix/Cytoperm and Ki-67 kit (BD) following the manufacturer’s instructions. Cells were analyzed using a LSR II flow cytometer (BD).

For *in vivo* bromodeoxyuridine (BrdU) incorporation, mice were intraperitoneally injected with two doses of BrdU (BD Pharmingen), 8 and 2 hours before sacrifice, at 50 μg/g b.wt. BM cells were then isolated and enriched for Lin− cell population using lineage cell depletion kit (Miltenyi). At least 1.5 × 106 Lin− BM cells were labeled with PE-conjugated-Sca-1 (D7), APC-conjugated-c-Kit (2B1), PerCP-eFluor 710-conjugated-CD135 (eBioscience, San Diego, CA), and eFluor 450-conjugated CD34 (eBioscience), followed by fixation and staining with FITC-conjugated BrdU antibody (BrdU Flow Kit, BD Pharmingen).

**RNA isolation, SMARTer cDNA synthesis and amplification**

Frozen lysates were thawed on ice and with 2.2X Agencourt RNAClean XP Beads (Beckman Coulter Genomics) without final elution. The beads with captured RNA were air-dried and processed immediately for cDNA synthesis. Whole transcriptome-amplified cDNA products were generated using the SMARTer Ultra-low RNA kit (Clontech). We purified the amplified cDNA using AMPure XP SPRI beads and resuspended in TE buffer.

**Nextera library construction and sequencing**

Cleaned up amplified cDNA was used for library construction using the 96-well format of Nextera XT DNA Sample Preparation Kit and Nextera XT Index Kit (Illumina). Libraries were pooled and cleaned up using AMPure XP SPRI beads (Beckman Coulter Genomics). Final library quality and quantity were assessed using a DNA High Sensitivity chip (Agilent). Each final library consisting of a pool of 96 individual libraries was first sequenced on a MiSeq and then on a HiSeq2000 with 25bp paired-end reads.

We prepared and profiled libraries from 1,152 individual cells. The libraries were of comparable quality to published SMART-seq data ([Ramskold et al. 2012](#_ENREF_44); [Shalek et al. 2013](#_ENREF_51); [Shalek et al. 2014](#_ENREF_52)).

**Processing of RNA-seq data**

Paired-end 25bp reads were mapped to the UCSC mouse transcriptome (genome build mm9) ([Hsu et al. 2006](#_ENREF_18)) by Bowtie ([Langmead et al. 2009](#_ENREF_25)) and expression levels of all genes were estimated by RSEM ([Li and Dewey 2011](#_ENREF_26)). TPM values (transcripts per million) as defined by RSEM were added a value of 1 (to avoid zeros) and then log2-transformed. These values were used for global comparison of different RNA-seq samples, as shown in **Figure 1**. To compare population RNA-seq data to single-cell RNA-seq data we aggregated the expression levels estimated for all single cells from the same cell type and age, by first averaging the TPM values of these cells, and only then adding 1 and log2-transforming. These analyses were performed with all cells.

Before all subsequent analyses, we filtered and centered the data. First, we filtered out cells in which less than 2,500 genes were detected above a log2(TPM+1) threshold of 2, leaving 1,059 cells for further analysis, with comparable representation of the different cell types and two ages. Second, we excluded genes whose log2(TPM+1) was lower than 4 in the aggregated data for each of the 6 populations, leaving 8,422 genes for further analysis. Third, we centered the data by subtracting for each gene its average expression (log2(TPM+1)) across all cells.

**Principal component analysis (PCA)**

Matlab’s PCA function with default parameters was used first to separately analyze each set of cells of the same cell type and age (**Figure 2A**) and then to analyze all 692 ‘non-cycling’ cells from the different cell types and ages together (**Figure 3**).

**Clustering based analysis of cell cycle state**

Cell cycle genes were defined as those with a “cell cycle process” Gene Ontology annotation (downloaded from MSigDB version 3.1) ([Reference Genome Group of the Gene Ontology 2009](#_ENREF_45)) or that were identified as cycling in HeLa cells ([Whitfield et al. 2002](#_ENREF_67)). We defined four cell cycle signatures (G1/S, S, G2/M and M) as the average expression (log2(TPM+1)) of phase-specific subsets of the cell cycle genes as defined previously in synchronized HeLa cells ([Whitfield et al. 2002](#_ENREF_67)). We refined these signatures by averaging only over those genes whose expression pattern in our data correlated highly (R>0.5) with the average signature of the respective cell cycle phase (before excluding any gene), in order to remove the influence of genes that were previously detected in HeLa cells but do not appear to cycle in our data. To further demonstrate the robustness of this approach and its independence from HeLa-specific expression patterns we considered alternative cell cycle gene-sets based on the Gene Ontology (GO) “M-phase” and the Reactome “S-phase” gene-sets. We applied the filtering step to these gene-sets, calculated alternative S-phase and M-phase scores (for each single cell), and compared these to our original scores for the corresponding phases. The correlation between the HeLa-based and GO-based scores for the S and M phases were 0.97 and 0.98, respectively, indicating that we are converging to a robust signature of phase-specific expression programs along the cell cycle.

We then considered, for each cell, the maximal cell cycle signature score (of the four possible signatures) in order to identify the subset of cells with a significantly high expression of at least one of the signatures. The distribution of maximal scores was fitted to a Gaussian plus a right tail that we excluded (**Figure S2A**), and *p*-values were derived from the fitted Gaussian distribution. We used these *p*-values to derive a threshold for significance with an estimated false discovery rate (FDR) of 5% to identify 367 apparently cycling cells.

We performed hierarchical clustering of the 367 cycling cells using the average linkage method. Clustering showed the presence of two robust clusters that express either G1/S and S signatures or G2/M and M signatures (**Figure S2B**). We thus defined two clusters of cycling cells using the above threshold (from **Figure S2A**) for the average of G2/M and M signatures (cluster 1) and the average of G1/S and S signatures (cluster 2). We examined the impact of the selected threshold on the number of predicted cycling cells and on the effects of aging. The number of cells in cluster 1 was extremely robust to choice of threshold. The number of cells in cluster 2 was slightly threshold-dependent, yet the effect of aging on this cluster was highly robust, and a significant reduction specifically in LT-HSC was observed over a wide range of thresholds (**Figure S2E**).

**High-resolution analysis of cell cycle progression**

Plotting the average of the G1/S and S signatures *vs*. the average of the G2/M and M signatures for each cell (**Figure 2D** and **S3A**) showed an approximate circle, which we assume reflects all phases of the cell cycle. Based on this assumption we ordered all cells according to the apparent progression along the cell cycle and assigned a rank of cell cycle progression to each cell (**Figure S3A** and **Table S1**). This was done by manually defining four discrete regions in the circle in which the direction of cell cycle progression appears approximately fixed and ranking the cells in each region based on the corresponding direction of progression. For example, in the region of G0 and G1 cells the progression is primarily along the *x*-axis (G1/S signature score) and thereby cells in that region were ranked by the G1/S signature score; see **Figure S3A** for definition of the discrete regions and the direction of progression. To estimate the progression ranks that reflect phases of the cell cycle we examined the average expression of the G1/S, S and G2/M signatures (with a sliding window of 11 cells) and assumed that each phase ends where the corresponding signatures starts to decrease (see **Figure 2E**). We note that small deviations in ranking will have minimal effects on our main results since subsequent analysis is in windows of 100 or 150 cells (below).

We used a sliding window of 100 cells to examine the frequency of cells from each population (age and cell type combination) along the continuum of cell cycle progression ranks (**Figure S3B**) and compared these frequencies between matched populations of the same cell type that differ by age (**Figure 2G**).

To identify cell cycle-regulated genes, we used a sliding window approach, with a window size of 150 cells. To identify genes upregulated in at least one window of the cell cycle relative to G0, we first searched for the window with maximal expression of each gene among the cycling cells and then compared the expression of that gene in cells in that window to the cells in G0. To avoid the confounding effects of cell type-dependent and age-dependent expression (*e.g.*, MPPs are enriched in G2/M and thus MPP-specific expression could be mistaken for G2/M-specific expression) we performed these comparisons separately within each of the six populations of cells with matched cell type and age (young LT-HSC, young ST-HSC, young MPP, old LT-HSC, old ST-HSC, and old MPP). For each of the six populations we used a one-sided T-test with and defined cell cycle regulated genes as those with *P*<0.025 in at least two of the six populations. The same analysis was performed to identify genes with cell cycle downregulation, in which we searched for a window with minimal expression. To estimate a false discovery rate (FDR), we shuffled the order of cells along the cell cycle progression ranks and repeated the above analysis a hundred times; we found an average of 73 significant genes in this control analysis, compared to 2,707 in the original analysis, suggesting an FDR of 2.7%. For each of these cell cycle regulated genes we estimated the relative expression in each cell cycle phase by averaging the expression of all cells that are predicted to reside in that phase (**Table S2**).

**Identification of aging- and differentiation-dependent differentially expressed genes**

Two-sample *t*-tests with a *p*-value of 0.05 and no correction for multiple testing were initially used to identify potentially significant differential expression in comparison of each pair of populations with matched cell types but different age (age effects) or matched age but different cell type (differentiation effects). Four comparisons reflected age effects, including young *vs*. old comparisons of LT- and ST-HSCs, each performed twice with the biological replicates for the old populations that were derived from different sets of mice. Three comparisons reflected differentiation effects, including LT- *vs*. ST-HSCs, in young, and in the two replicates of old mice. We identified 78 genes that had significant differentiation effect in all three comparisons and significant age effect in the two comparisons of young *vs*. old LT-HSCs; most of these also had significant age effects in the two comparisons of young *vs*. old ST-HSCs but this was not used to define the set. All together, 8422 were tested, and each gene was required to satisfy five distinct t-tests (P<0.05), and thus the expected number of genes was only 0.055*8422 = 0.0026. One caveat with this calculation is that the five T-tests are not all independent as in same cases the same population was used in more than one test. We thus also performed a simulation in which we shuffled the cell labels (i.e. randomized the definition of populations) and repeated the above analysis a hundred times. In each of the simulations we identified less than 4 genes compared with 78 in the real test), implying FDR<0.05. All but one of these genes had inverse differentiation and age effects as shown in **Figure 4B** and listed in **Table S3**.

**An MPP age-independent expression program**

PCA was performed only among non-cycling MPP cells (young and old). Genes with a Pearson correlation above 0.35 or below -0.35 were defined as gene-set1 and gene-set2, respectively. The signature score for that effect was defined as the average normalized expression of gene-set1 minus the average normalized expression of gene-set2, and MPP cells were ranked according to that score.

**Conservation among mouse strains**

The same analyses were performed for the single cell RNA-seq data derived from the two strains. To further examine the C57BL/6 aging-differentiation effect in DBA/2, we first identified the 100 most positively correlated and 100 most negatively correlated genes with PC1+PC2 in C57BL/6. The C57BL/6-derived signature scores were then defined as the average normalized expression of the positively-correlated genes minus the average normalized expression of the negatively-correlated genes, and these scores were compared among cells from distinct cell types and ages.
