# Supplementary material for: Single-cell RNA-seq reveals changes in cell cycle and differentiation programs upon aging of hematopoietic stem cells
Source: HighWire-hosted journal article supplement (doi:10.1101/gr.192237.115), 2015-10-01
Supplement: Table_S1.xlsx [file Table_S1.xlsx]

## Sheet: cell cycle dependent expression
Symbol	UCSC transcripts	Significant populations	Early G1	Late G1	S	G2/M
	'uc008stp.1,uc008stq.1,uc012ddr.1'	4	1.17457	0.387289	0.958305	0.797759		up-regulated in non-cycling vs. cycling cells
Lsm10	'uc008usk.2,uc012dlb.1'	2	0.910408	0.847573	0.0999231	0.381764		down-regulated in non-cycling vs. cycling cells
Itga2b	'uc007lrx.2,uc007lry.2,uc007lrz.1,uc007lsa.1'	3	0.990586	0.791526	0.119766	0.286993
Mavs	'uc008mld.1,uc008mle.1,uc008mlf.1'	4	1.65656	0.70819	1.00111	0.657129		Significant populations
Cnot2	'uc007hca.2,uc007hcb.2,uc007hcc.2,uc007hcd.2,uc007hce.2,uc007hcf.1'	2	1.14636	0.791173	-0.0727399	1.02857		Number of populations (out of 6) in which that particular transcript was significantly differentially expressed in the a subset of the cycling compared to the G0 cells
Pttg1ip	'uc007fvx.1'	2	1.31073	0.194311	0.191707	1.00401
Pgrmc1	'uc009sxo.1'	2	1.67331	0.847345	1.34066	0.983302
Rabepk	'uc008jiu.1,uc008jiv.1'	3	1.51482	1.16923	1.06561	1.22105
Morf4l1	'uc009qzw.2,uc009qzx.2,uc009qzy.1,uc009qzz.2'	2	1.11673	0.850218	0.963289	0.157232
Fahd1	'uc008ayl.1'	2	0.823211	0.801173	-0.517085	-0.17219
Xrcc5	'uc007bkl.2'	3	1.0603	0.551488	0.598665	-0.231546
Cdadc1	'uc007ueo.2,uc007uep.2,uc007ueq.2,uc011zmv.1,uc011zmw.1,uc011zmx.1'	2	1.3052	0.655235	1.16778	1.03903
Ubash3a	'uc008bur.2,uc008bus.2'	2	1.55199	1.01952	1.45096	1.38647
Akr1b3	'uc009bgy.2'	4	2.55346	1.83787	1.97489	1.88541
Tnfrsf18	'uc008wfw.1,uc008wfx.1,uc008wfy.1'	2	1.08712	0.815009	1.02988	0.238296
Gtf2h4	'uc008cig.1'	3	1.22549	1.00542	0.831294	0.696388
Hdac10	'uc007xfj.2,uc007xfk.2'	3	1.45427	0.918987	0.98492	1.21591
Itgb1	'uc009nzv.2,uc009nzw.2,uc009nzx.2'	3	1.4167	1.04972	1.07765	1.19267
Ltc4s	'uc007irz.1,uc007isa.1,uc007isb.1'	3	1.02834	0.902427	0.637976	0.199496
Abhd11	'uc008zxg.2,uc008zxh.2,uc008zxi.1,uc012eeh.1'	4	2.30889	2.07413	1.56156	0.674403
Cct5	'uc007vkj.1'	3	1.32621	1.24253	1.32456	1.08183
Nmd3	'uc008pmk.1,uc008pml.1'	2	1.63047	1.57083	0.988307	1.47132
Polr2h	'uc007yqz.1'	2	2.027	1.25254	1.79455	0.959845
Rpl22l1	'uc008ouf.1,uc008oug.1'	2	1.40194	0.55554	1.32113	0.978461
Mrfap1	'uc008xfa.2'	2	1.15262	0.950954	0.766685	0.91266
	'uc009gks.1,uc009gkt.1'	3	1.00885	0.904577	0.964523	1.00731
Smad2	'uc008fqn.1,uc008fqo.1'	2	0.897935	0.76183	0.889021	0.72859
Lass5	'uc007xqf.1,uc007xqg.1'	3	0.575476	0.570052	0.416292	0.36222
Ipo4	'uc007tzp.1,uc007tzq.1,uc007tzr.1'	2	0.315719	0.642929	0.343248	-0.082339
Cdca7	'uc008kbx.1'	6	6.24694	6.53854	6.29228	3.85869
	'uc007mja.2,uc007mjb.2'	2	0.603547	0.617671	-0.189762	0.484347
Mcm4	'uc007yhr.2'	6	5.84402	6.5469	6.32524	3.84113
Mcm2	'uc009cvx.2'	6	5.72492	6.87758	6.67044	3.45395
Mcm3	'uc007alc.1'	6	6.48246	7.19464	6.79401	4.10564
Fubp1	'uc008rst.1,uc008rsu.1,uc008rsv.1,uc008rsw.1,uc008rsx.1,uc008rsy.1,uc008rsz.1,uc008rta.1'	3	1.54598	1.86955	1.80511	1.12783
	'uc012cbk.1'	3	1.08577	1.899	1.37765	0.508374
Il27ra	'uc009mlr.2'	2	0.83408	0.993999	0.184356	-0.480364
Bzw2	'uc007njp.2,uc007njq.2,uc007njr.2'	5	2.61183	3.41187	3.16074	2.4272
Zfp422	'uc009dkj.1,uc009dkk.1,uc009dkl.1'	3	1.6729	2.64778	2.48503	2.28829
Abcf2	'uc008wsb.2,uc012dtd.1'	5	2.27088	3.85447	3.0895	2.37531
	'uc007alb.1'	6	4.89612	5.65406	5.43095	2.42385
Rfc2	'uc008zwl.1'	6	3.81452	4.5693	4.35903	2.893
Amd1	'uc007ews.2'	2	0.831267	2.12953	1.72358	1.36824
Psma5	'uc008qyq.1'	3	2.03064	2.4025	2.28397	2.11239
Eif2s1	'uc007nzk.1'	5	2.06438	2.99677	2.88392	2.46938
Nono	'uc009txr.2,uc009txs.2,uc009txt.2'	4	1.50662	2.21135	2.18968	1.69288
Mki67ip	'uc007cic.2,uc011wql.1'	3	1.81232	2.8025	1.78695	1.93887
B4galnt1	'uc007hib.1,uc007hic.1,uc007hid.1,uc007hie.2,uc007hif.2,uc007hig.2'	5	1.75932	2.42401	1.92104	1.15799
Tmem134	'uc008fyr.1,uc008fys.1,uc008fyt.1,uc008fyu.1,uc008fyv.1,uc012bgd.1'	2	0.663376	1.14196	0.477982	0.926089
Ninj1	'uc007qiw.1'	2	0.764483	1.01624	0.272959	-0.779796
Polr2f	'uc007wst.1'	6	2.10318	3.48123	3.4136	2.58058
Mrpl54	'uc007ggy.1'	5	1.19263	3.2294	3.02296	2.72697
Mrps7	'uc007mia.1'	5	1.3323	2.31251	2.27025	1.61992
Rpl7l1	'uc008cuj.1,uc008cuk.1'	3	0.827192	1.07854	0.537136	1.03854
Hmga1	'uc008boy.2,uc008boz.2,uc008bpa.2,uc008bpb.2,uc008bpc.2,uc008bpd.2,uc012anw.1,uc012anx.1,uc012any.1,uc012anz.1,uc012aoa.1,uc012aob.1,uc012aoc.1,uc012aod.1'	6	2.49853	3.24623	2.99292	1.94964
Ndufv2	'uc008dgw.1,uc008dgx.1'	3	1.84567	2.27748	2.21646	1.94427
Nop56	'uc008mil.1,uc008mim.1'	5	2.41212	2.84506	2.76974	1.57895
Snx5	'uc008mqq.2,uc008mqr.2'	3	1.32466	1.85268	1.65719	0.919674
Spag7	'uc007jvz.2,uc011xxz.1'	2	0.766045	1.57584	1.35635	1.2909
Inpp5f	'uc009jzc.1,uc009jzd.1,uc009jze.1,uc009jzf.1,uc009jzg.1'	6	1.72874	2.18473	1.62661	0.523544
Ncf4	'uc007wow.2,uc007wox.2'	2	1.83391	2.73523	2.64718	1.19301
Eif3a	'uc008ibx.1,uc008iby.1'	2	1.4345	2.05582	1.66069	1.57419
Tars	'uc007vhc.1'	2	1.27546	2.12294	1.44659	1.76284
Bad	'uc008gjn.1,uc008gjo.1'	4	1.24449	2.22362	1.88881	0.698552
Ndufaf4	'uc008sed.2'	3	1.30559	1.57575	1.45606	0.80353
Ung	'uc008yzf.1,uc008yzg.1,uc008yzh.1'	6	2.53395	3.74175	2.6111	-0.0864318
Slco4a1	'uc008ojc.1,uc008ojd.1,uc008oje.1,uc008ojf.1'	3	0.945116	1.03606	0.547466	0.512955
Lyn	'uc008rwk.2,uc008rwl.2,uc008rwm.2'	2	0.878232	0.885296	0.286595	0.812872
Wdr12	'uc007bee.2,uc007bef.2,uc007beg.2'	3	2.47113	2.67616	2.29008	2.21466
Prkdc	'uc007yhs.1,uc007yht.1,uc007yhu.1'	5	1.1327	1.5654	1.31987	0.476487
Tmem97	'uc007kjv.1'	4	1.27	2.68742	2.34099	1.72772
	'uc007elx.1,uc007ely.1,uc007elz.1'	4	1.68401	2.38364	2.0792	2.29737
Zdhhc12	'uc008jbd.1,uc008jbe.1'	2	0.772431	1.2234	0.193463	0.802148
Pdia6	'uc007nco.1,uc007ncp.1'	3	1.27903	1.95312	1.75886	1.13215
Usp37	'uc007bmc.2,uc007bmd.2,uc007bme.1'	6	2.38235	3.11184	2.88354	1.11435
Got2	'uc009mzi.1'	3	1.03742	2.19941	1.92522	1.54805
Cdk2	'uc007hny.2,uc007hnz.2,uc007hoa.1,uc011xqh.1'	6	1.85849	2.71177	2.30973	1.59185
Drg1	'uc007hsh.1,uc007hsi.1'	4	1.52638	2.33086	1.94496	1.43868
Usp10	'uc009nqn.1,uc009nqo.1'	4	1.72354	2.44011	2.06856	1.91956
Cdca7l	'uc007pid.1'	3	1.75869	2.23071	2.2179	1.7447
Pfkl	'uc007fwo.2'	3	1.46119	1.98147	1.81923	-0.134469
Imp4	'uc007aor.2'	4	1.85581	2.85544	2.83115	2.47212
Zfyve21	'uc007pea.1,uc007peb.1'	2	0.64672	0.959588	0.511062	0.0854255
Cct8	'uc007zul.1'	3	1.63713	2.47037	2.24552	1.63023
Yars	'uc008uwk.2'	5	0.839496	2.92182	2.68796	1.46306
Mcmbp	'uc009jzh.1,uc009jzi.1'	5	1.32358	2.02924	1.5232	0.462498
Tubgcp2	'uc009kgl.2,uc009kgm.2,uc009kgn.1,uc012fwd.1'	6	1.94324	3.23451	3.08253	1.41772
Ltv1	'uc007ekp.1'	5	2.06763	2.34825	2.05702	0.783638
Fasn	'uc007mut.1'	4	0.858644	1.75125	0.815953	0.332189
Cd3eap	'uc009fln.2'	3	1.05839	1.70237	1.36046	-0.137591
Slc38a2	'uc007xkm.1,uc007xkn.1'	2	1.36401	1.44503	0.79562	1.34124
Mat2a	'uc009cip.1,uc009ciq.1'	3	1.30053	1.4947	0.948307	1.04653
Gins1	'uc008mur.2,uc008mus.2'	6	2.44859	4.29045	3.81255	2.25202
Aldh18a1	'uc008hkw.2,uc008hkx.2,uc008hky.2'	4	1.28513	2.18952	1.60859	1.55233
Ciapin1	'uc009mxa.1,uc009mxb.1,uc009mxc.1'	4	1.43323	2.38739	2.16443	1.24408
Dus3l	'uc008ddd.2,uc008dde.2'	2	1.2589	1.54819	1.48134	-0.103417
Manf	'uc009rkt.1,uc009rku.1'	3	1.59903	2.01999	1.98048	1.16445
Mbd3	'uc007gda.1,uc007gdb.1,uc007gdc.1'	3	1.05231	1.41651	0.663568	0.753695
Dnaja1	'uc008sht.2,uc012dbw.1,uc012dbx.1,uc012dby.1'	3	1.00397	1.25808	1.22664	1.13507
Kars	'uc009nne.2,uc009nnf.2,uc009nng.2'	3	1.37232	2.08293	2.00214	1.95802
Mtf2	'uc008ynj.1,uc008ynk.1,uc008ynl.1,uc008ynm.1,uc008ynn.1,uc008yno.1,uc012eap.1'	3	1.10143	1.78365	1.70717	1.42617
Zfp629	'uc009jwg.1,uc009jwh.1,uc009jwi.1,uc009jwj.1'	2	0.330701	1.10882	0.461729	0.376194
Clns1a	'uc009ijr.1'	3	1.66973	2.3459	2.33842	2.20261
Gpatch4	'uc008ptr.2,uc008pts.2,uc012crm.1'	5	1.56013	2.06057	1.29657	1.18561
Nr2c2ap	'uc009lyv.1,uc009lyw.1'	4	1.21032	1.75257	0.871719	0.772851
Pdcd2l	'uc009giw.1'	2	0.583116	0.934785	0.326933	0.786573
Srsf7	'uc008dqp.1,uc008dqq.2,uc008dqr.2,uc008dqs.2,uc008dqt.2,uc012axq.1,uc012axr.1'	4	1.23444	1.3411	1.0969	0.770104
Pusl1	'uc008wfi.1,uc012drb.1'	3	0.977888	1.41312	0.689626	0.157421
Ccdc90b	'uc009ihv.2,uc009ihw.2'	2	0.314302	1.07151	0.692148	0.635067
Ccdc86	'uc008grj.2'	2	0.697707	1.10922	0.858568	0.59304
Zhx1	'uc007vtd.1,uc007vte.1'	2	1.34429	1.38246	1.067	1.01948
Gmps	'uc008pke.1'	2	1.23019	1.68264	1.25822	1.07826
Nap1l4	'uc009kpk.1,uc009kpl.1,uc009kpm.1'	3	1.59307	2.23266	2.00034	0.878226
Ldha	'uc009gzm.2,uc009gzn.2,uc009gzo.2'	3	0.984223	1.28531	1.23327	0.0388796
Xist	'uc009tzo.1,uc009tzp.1'	4	1.19139	1.35948	1.10708	0.798341
Pycrl	'uc007whq.1,uc007whr.1'	3	1.42005	2.14582	2.00922	0.512024
Bax	'uc009gvh.1,uc009gvi.1'	3	1.0591	2.08209	2.06679	1.51998
Ubtf	'uc007lri.1,uc007lrj.1,uc007lrk.1,uc007lrl.1,uc007lrm.1,uc007lrn.1,uc007lro.1,uc011yfr.1'	4	1.10451	2.11561	2.02797	1.30077
Prps1l3	'uc007npl.2'	4	1.46468	2.11528	1.88501	1.67562
Flna	'uc009tny.1,uc009tnz.1'	3	1.21848	1.87838	0.901301	1.53814
Fam173a	'uc008bbw.1,uc008bbx.1,uc008bby.1'	2	0.977878	2.06859	2.03555	1.45691
Pdia4	'uc009btf.1'	3	1.20775	1.88037	1.40931	1.68175
Setdb1	'uc008qjl.2,uc008qjm.2,uc008qjn.2,uc008qjo.2'	3	1.04046	1.29907	0.958	0.866516
Ctnnbl1	'uc008nph.2,uc012cib.1'	5	0.855909	1.97751	1.50345	1.62277
Hars	'uc008eop.2,uc008eoq.2'	3	1.28032	1.92023	1.71252	1.37172
Ccdc101	'uc009jse.2'	5	1.43936	2.50094	1.91685	1.7974
Pnn	'uc007nqa.1,uc007nqb.1'	3	1.22217	1.55396	1.46914	1.0765
Fyttd1	'uc007yzo.2,uc007yzp.2,uc007yzq.2,uc012aes.1'	2	0.702973	1.2551	1.0798	0.919916
Sars	'uc008qza.1,uc008qzb.1,uc008qzc.1'	3	1.11142	1.26632	1.1589	1.16088
Eif4a1	'uc007jqz.2,uc007jra.2'	2	1.0132	1.59507	1.29437	1.19649
Gcfc1	'uc007zwz.2,uc012aih.1'	4	1.01719	1.4781	1.27814	0.929989
Ing5	'uc007cen.1,uc011wpr.1'	4	0.969118	1.17817	1.06021	0.527802
Tti1	'uc008npj.1,uc008npk.1'	2	0.728897	1.8498	0.568432	1.82339
Azin1	'uc007vns.1,uc007vnt.1,uc007vnu.1'	3	0.915317	2.13067	1.4963	1.41518
Timm17a	'uc007csz.1'	3	1.21134	2.0974	2.00156	1.65859
Dhx15	'uc008xkf.1,uc008xkg.1,uc008xkh.1,uc012dwe.1'	3	1.2504	1.75974	1.73721	1.57258
Tsta3	'uc007whs.1,uc007wht.1'	3	0.76569	2.09826	2.05921	1.50823
Rasgrp2	'uc008gip.1,uc008giq.1,uc008gir.1,uc008gis.1'	3	1.02916	2.03791	1.8427	0.910103
Eif4ebp1	'uc009lih.1'	3	1.17812	1.94867	1.60645	0.328078
Topbp1	'uc009rgl.1,uc009rgm.1'	5	1.03872	1.38996	1.08649	0.649157
Tpt1	'uc007uqz.2'	2	0.621857	1.26713	0.88372	0.103229
Akt2	'uc009fwr.2,uc009fws.2,uc009fwt.2,uc012fgk.1'	2	0.961283	1.65619	0.860368	1.13953
	'uc007qxe.1'	3	0.825453	0.988923	0.985505	0.338524
Nup54	'uc008ydk.1,uc008ydl.1'	3	1.23483	1.9185	1.51138	1.73918
Mad2l2	'uc008vub.1,uc008vuc.1'	6	1.10175	2.09861	2.0721	0.743889
Exoc3	'uc007reu.1'	2	-0.289426	1.3409	0.0244427	0.850582
Ascc1	'uc007feg.2,uc007feh.2,uc007fei.2,uc007fej.1'	2	0.974393	1.08435	0.277977	0.891747
Cherp	'uc009mga.1,uc009mgb.1,uc009mgc.1'	3	0.904183	1.47899	0.884874	0.614788
Clcc1	'uc008qzk.2,uc008qzl.2,uc008qzm.2,uc008qzn.2'	4	1.08279	2.25598	1.55063	1.75175
Srm	'uc008vuw.1'	4	1.0243	2.16567	1.35835	0.526303
Npat	'uc009pmf.1'	3	0.516687	1.57147	0.584621	0.987165
Mrps6	'uc007zyu.1'	2	0.456267	1.07844	0.582824	0.853867
Fancl	'uc007igd.1,uc007ige.1,uc011xsj.1'	4	1.35472	1.35481	0.938863	1.12613
Hspa4	'uc007ivq.1,uc007ivr.1'	2	-0.0128602	0.97546	0.662377	0.501506
Tmed1	'uc009olp.1,uc009olq.1,uc012gpg.1'	4	0.52107	2.32081	1.94477	0.81793
Gm5665	'uc007qxd.1'	4	0.937735	1.17851	1.09798	0.440632
Acy1	'uc009rjp.1'	2	0.747617	1.84292	1.79058	0.853106
Tor3a	'uc007dcn.2,uc007dco.2,uc011wuh.1'	2	0.995156	1.91378	1.22163	0.826538
Cib1	'uc009hzs.1,uc009hzt.1'	3	0.934519	1.70225	0.807221	1.40821
Bag2	'uc007any.1'	4	0.851296	2.07592	1.81411	0.647255
Aga	'uc009lrz.1,uc012gdu.1,uc012gdv.1'	4	0.244953	1.51514	0.385805	1.08906
Casp7	'uc008hyw.1,uc008hyx.1'	4	0.726916	1.94617	1.47098	0.992271
Hnrnpa0	'uc007qtf.2'	4	0.252028	1.33225	0.73082	0.80689
Ncl	'uc007bvl.1'	3	0.851875	1.11582	1.05291	0.425145
Gpd1l	'uc009ryi.2,uc009ryj.2,uc009ryk.2'	2	0.944752	1.35225	0.918903	0.940374
Sdr39u1	'uc007ubc.1,uc007ubd.1'	3	1.13862	1.68997	1.60929	1.30813
Ormdl1	'uc007ayy.2,uc011wks.1'	3	0.975315	1.66115	1.22829	0.876183
RBM4B	'uc008gap.1,uc008gau.1,uc008gav.1,uc008gaw.1,uc008gax.1,uc008gay.1,uc008gaz.1,uc012bgl.1,uc012bgm.1,uc012bgn.1,uc012bgo.1'	3	0.492182	1.73053	1.31684	1.54234
Lyrm4	'uc007qcj.1'	5	0.403674	1.00136	0.961658	0.011271
Ankrd26	'uc009dlr.1,uc012ere.1,uc012erf.1'	3	0.931613	1.13378	0.828056	0.621828
Hsd17b12	'uc008lgp.1,uc008lgq.1,uc012bzy.1'	4	1.00106	1.9202	1.55473	1.73236
Cops7a	'uc009dsr.2,uc009dss.2'	3	0.926728	1.64732	1.44486	1.6234
Trim28	'uc009ffb.2'	5	0.500522	1.79944	1.34137	0.922125
Larp4	'uc007xql.1,uc007xqm.1,uc007xqn.1,uc007xqo.1,uc007xqp.1'	4	0.781632	1.83476	1.61214	0.777163
Pop5	'uc008zdi.1,uc008zdj.1'	2	0.905118	1.70528	1.5724	0.793009
Thumpd3	'uc009dek.1,uc009del.1'	2	0.760576	2.00284	1.56619	1.26066
Pex2	'uc008oob.2,uc008ooc.2,uc008ood.2,uc012cmy.1,uc012cmz.1,uc012cna.1,uc012cnb.1'	2	0.91206	1.74149	1.55151	0.392693
Aatf	'uc007kqm.1,uc007kqn.1'	2	0.192455	1.19359	0.225455	0.533833
Cyp51	'uc008wie.1'	3	0.385388	1.46641	1.1468	0.255739
Znrd1	'uc008clo.1,uc008clp.1'	2	0.738733	0.972807	0.757594	0.948711
Dtd1	'uc008mro.2'	3	0.319075	1.58973	1.44831	0.58621
Haus6	'uc008tlx.1,uc008tly.1'	4	0.693257	1.92306	1.70263	1.36632
Dus1l	'uc007mur.1,uc007mus.1'	4	0.519895	1.86663	1.36022	1.63072
Ddx3x	'uc009srl.2,uc009srm.2,uc012hey.1'	3	0.0883995	1.07693	0.930557	0.729082
Lap3	'uc008xiy.2'	2	0.997292	1.41897	1.0207	0.415193
Cct7	'uc009cpu.1,uc009cpv.2'	3	0.793101	1.55874	1.38451	1.27805
Bzw1	'uc007bbq.1,uc007bbr.1'	2	0.733233	1.76519	1.63103	1.27493
Adprh	'uc007zex.1'	2	0.614505	1.64073	1.2531	1.5182
Actr1b	'uc007aqx.1'	2	0.776618	1.50241	1.1268	1.17831
Gps2	'uc007jso.1,uc007jsp.1'	5	0.675774	1.86944	1.84212	1.44968
Mrpl41	'uc008ipu.1'	3	0.80702	1.56984	1.49838	0.874795
Atic	'uc007bjr.2,uc007bjs.2,uc007bjt.2'	2	0.47561	2.02504	1.43034	0.987606
Bysl	'uc008cvq.2'	2	0.738502	1.25692	1.20466	0.792932
Rogdi	'uc007ybj.1,uc007ybk.1'	2	0.633459	1.50142	0.795788	1.21295
Slc3a2	'uc008gmi.2,uc012bib.1,uc012bic.1'	3	0.82143	1.35718	1.27088	1.02355
Mrps25	'uc009cyu.1'	2	0.591927	1.5221	0.992634	0.741535
S100a1	'uc008qct.1'	4	0.302953	1.30853	1.26793	-0.19764
Sms	'uc009urz.1'	2	0.469992	1.06695	0.759072	0.906931
Trappc12	'uc007nfw.2,uc007nfx.2,uc007nfy.2,uc007nfz.2,uc007nga.2,uc011ylc.1'	3	0.796271	1.5502	1.34087	1.07076
Bin3	'uc007une.1'	2	-0.293146	1.21087	0.729891	0.98351
Akr1e1	'uc007pjs.1,uc007pjt.1'	2	0.382148	1.27137	0.882283	0.492954
Thop1	'uc007gfv.2'	5	0.223004	1.35425	1.14059	0.161814
Nsmce2	'uc007vxu.2,uc007vxv.2'	3	0.558304	1.70239	1.67667	1.37116
Cad	'uc008wwy.1,uc008wwz.1,uc012duj.1,uc012duk.1'	6	0.667107	1.83652	1.5854	0.977297
Cd72	'uc008spr.2,uc008sps.2,uc008spt.2,uc008spu.2,uc008spv.2'	3	0.502407	1.74161	1.63883	1.31792
Enoph1	'uc008yha.2,uc008yhb.2,uc012dzq.1'	4	0.44344	1.90202	1.81254	1.25638
Hnrnpu	'uc007dvb.2,uc007dvc.2,uc011wxl.1'	4	0.557705	1.60917	1.5022	0.984302
Commd10	'uc008evz.1'	2	0.798005	1.3115	1.30067	0.934376
	'uc008cui.1'	2	0.679686	1.33031	0.747095	0.409825
Naa16	'uc007usu.1,uc007usv.1'	2	0.827779	1.40418	0.752447	0.990175
Tank	'uc008juw.2,uc008jux.2,uc008juy.2,uc008juz.2,uc008jva.2,uc008jvb.2'	3	0.293058	1.37085	0.829999	1.34343
Fdps	'uc008pxo.1'	2	0.751077	1.58796	1.51256	1.10201
Rnf219	'uc007uxc.1,uc007uxd.1,uc007uxe.1'	3	0.47008	1.74979	1.62321	0.867867
Prmt1	'uc009gsf.1,uc009gsg.1,uc009gsh.1,uc009gsi.1,uc012fjy.1'	4	0.71824	1.47052	1.29528	0.74852
Utp6	'uc007kkz.1,uc007kla.1,uc007klb.1'	3	0.949917	1.16039	1.15474	0.996306
Palb2	'uc009joj.1,uc009jok.1,uc009jol.1,uc009jom.1,uc012ftg.1,uc012fth.1'	6	0.535721	1.52608	1.49378	1.40422
Rexo4	'uc008iwn.1'	3	0.645219	1.47894	1.45209	1.46945
Yeats2	'uc007ypi.2,uc007ypj.2,uc012aco.1,uc012acp.1,uc012acq.1'	2	0.517375	1.25264	1.18385	1.00733
Timm17b	'uc009sne.1'	3	0.797903	1.58607	1.53525	1.27926
Tada2a	'uc007kqf.1'	3	0.602791	1.12549	1.01877	0.75601
Rbck1	'uc008nfd.1,uc008nfe.1,uc012cge.1,uc012cgf.1'	3	0.252593	1.69316	0.740759	0.811942
Strada	'uc007lyf.1,uc007lyg.1,uc007lyh.1,uc011ygi.1'	3	0.777297	1.50473	1.35329	0.865472
Ccdc41	'uc007gvw.1,uc007gvx.1,uc007gvy.1'	3	0.351187	1.12731	0.688272	0.736263
Stag1	'uc009rey.1,uc009rez.1,uc009rfa.1,uc009rfb.1,uc012gzf.1'	2	0.266973	1.32624	1.18896	1.12464
	'uc008pxg.2,uc008pxh.2'	3	0.660465	1.13734	0.664835	0.754381
Gm20425	'uc009rgg.1,uc009rgh.1'	2	0.487304	1.38776	1.12868	0.999439
Coq6	'uc007ofb.2,uc007ofc.2,uc011yoy.1'	5	0.34659	1.50314	1.32025	1.28707
Mapk1ip1l	'uc007thy.1,uc007thz.1'	2	0.62687	1.33519	1.18093	0.988913
Zbtb1	'uc007nyd.2,uc007nye.1'	3	0.607852	1.14041	1.04063	0.828833
Rbmx2	'uc009tct.1'	4	0.103634	1.61688	1.38719	1.3594
Fam175a	'uc008yid.1,uc008yie.1,uc008yif.1'	2	0.396866	1.4138	1.15521	1.19666
Anxa3	'uc008yfl.2,uc008yfm.2,uc008yfn.1'	3	0.660424	1.17618	1.0376	1.10453
Pfkp	'uc007pjz.1,uc007pka.1,uc007pkb.1,uc007pkc.1,uc007pkd.1'	2	0.202501	1.27482	0.229049	0.462476
Galk2	'uc008mde.1,uc008mdf.1,uc008mdg.1'	2	0.401955	1.39545	1.34831	0.745809
Mrps34	'uc008ayy.1'	3	0.222953	1.18218	0.811971	0.681009
Acp6	'uc008qoq.2,uc008qor.2'	2	0.563427	1.47866	0.98255	1.40518
Rwdd1	'uc007eun.1'	3	0.498186	1.13906	0.968972	0.765818
Icam4	'uc009ojy.1,uc009ojz.1'	4	0.281281	1.0664	0.694888	0.341466
Uspl1	'uc009apg.2,uc009aph.2,uc009api.2,uc009apj.2,uc009apk.2,uc009apl.2,uc009apm.2,uc009apn.1'	2	0.423245	0.971139	0.884039	0.887602
Rhebl1	'uc011zzb.1'	3	0.717362	0.941392	0.9105	0.513511
Gars	'uc009cai.1'	4	0.392867	1.11675	0.928237	0.737368
Hcst	'uc009geg.1,uc009geh.1,uc012fhm.1'	2	0.471568	1.37138	1.32009	0.694056
Got1	'uc008hoj.1,uc012bmb.1'	3	0.347445	1.38529	0.992048	1.36108
Klhdc3	'uc008ctw.2,uc008ctx.2'	2	0.340506	1.43168	0.930215	1.29724
Rps19bp1	'uc007wvm.1'	2	0.29573	1.1743	1.01623	1.00615
Atg5	'uc007ezt.1'	2	0.41844	1.13151	1.06368	0.905776
	'uc008ued.2,uc008uee.2,uc012diy.1'	4	0.0557697	0.878395	0.875431	0.399844
Ciz1	'uc008jff.1,uc008jfg.1,uc008jfh.1,uc008jfi.1,uc008jfj.1'	3	0.479686	1.17336	0.842994	1.10886
Sfr1	'uc008hvk.1'	2	0.520663	0.986668	0.913865	0.807349
Zfp956	'uc009btr.2,uc009bts.2'	3	0.394833	1.0415	0.428981	0.717767
Agfg2	'uc009adk.1,uc009adl.1,uc009adm.1,uc009adn.1,uc009ado.1'	2	0.138449	1.04573	0.942284	0.562891
Exosc4	'uc007wjp.1'	2	0.327046	0.942459	0.8992	0.844198
Ndufaf1	'uc008luc.1,uc008lud.1'	2	0.572293	1.00219	0.966314	0.76871
Srek1	'uc007rsh.1,uc007rsi.1,uc007rsj.1'	2	0.771198	0.900832	0.725115	0.486599
Phrf1	'uc009kkb.1,uc009kkc.1,uc009kkd.1,uc009kke.1,uc009kkf.1'	2	-0.0120043	1.19924	1.03765	0.99798
Vars	'uc008cey.2,uc008cez.2'	4	0.210212	1.13762	0.997904	1.11209
Dpp9	'uc008dbh.2,uc008dbi.2'	2	0.192206	1.12325	0.641657	0.842149
Dpm2	'uc008jfu.1'	2	0.55475	1.05074	0.766265	1.01236
Cdkn1a	'uc008bsg.2,uc008bsh.1,uc012aom.1'	2	0.139842	0.982336	0.963379	0.783716
Opa1	'uc007ywe.2,uc007ywf.2,uc007ywg.2'	4	0.314196	1.19726	0.793215	1.14803
Adipor1	'uc007crx.1,uc007cry.1'	2	0.306739	1.12838	1.09756	0.893235
Thoc5	'uc007hvl.1'	2	0.0791663	1.14227	0.991396	1.07307
Zbtb8a	'uc008uww.1'	4	0.222872	1.05619	0.617489	0.795201
Med28	'uc012dvz.1'	2	0.626669	0.929168	0.893256	0.922171
Pafah1b2	'uc009pgx.1,uc009pgy.1'	3	0.134203	0.859702	0.655409	0.50971
Ebag9	'uc007vpz.1,uc007vqa.1,uc007vqb.1'	3	0.447311	0.936102	0.926554	0.587729
Ppm1f	'uc007yjo.2'	2	0.706917	0.647153	1.04331	0.414593
Keap1	'uc009oko.2,uc009okp.2,uc009okq.2,uc009okr.2'	3	0.755036	0.0868487	1.21337	0.843458
Mcm6	'uc007cln.1,uc007clo.1'	6	5.96158	6.20125	6.27153	3.39732
Pak1	'uc009iju.1,uc009ijv.1,uc009ijw.1'	2	0.648191	0.38187	0.942896	0.835935
Rrm1	'uc009irp.2'	6	4.19684	6.54612	7.2608	5.76794
Skap2	'uc009bxv.1,uc009bxw.1'	2	0.599237	0.995217	1.40453	0.800842
Api5	'uc008lgx.1,uc008lgy.1,uc008lgz.1'	3	1.30134	2.35614	2.42193	1.43228
Slbp	'uc008xav.1,uc008xaw.1,uc008xax.1'	6	4.30277	5.60257	6.34403	3.36543
Pcna	'uc008mml.1'	6	4.78409	6.64019	7.1475	4.03115
Atad2	'uc007vtf.1,uc007vtg.1,uc007vth.1,uc011ztb.1'	6	3.34731	5.58733	6.35694	4.07236
Aldh7a1	'uc008eyn.2,uc008eyo.2'	4	0.615999	0.66905	1.79272	0.758035
Rpa1	'uc007kdi.2,uc007kdj.2,uc011xzi.1'	6	3.58328	5.07407	5.83059	3.41227
Tipin	'uc009qbr.1,uc009qbs.1,uc009qbt.1'	6	6.41024	7.22218	7.87912	4.8722
Mpo	'uc011ycc.1'	2	4.04196	5.66061	8.23022	6.13812
Txnl1	'uc008fdx.1,uc008fdy.1'	6	2.39843	2.73249	3.26579	2.2745
Ddx39b	'uc008cgz.2,uc008cha.2,uc008chc.2,uc008chd.2,uc008che.1'	6	1.91807	2.46123	2.5102	2.40407
Mcm5	'uc009mhd.1,uc009mhe.1,uc009mhf.1'	6	7.29228	8.33376	8.5901	5.27743
Apex1	'uc007tly.1'	4	2.58857	4.02661	4.0818	1.16098
Cirh1a	'uc009ngr.2'	5	1.82102	2.86078	2.90297	1.27701
Syce2	'uc009mnv.2,uc009mnw.2,uc012ghl.1,uc012ghm.1'	6	3.93155	5.4943	6.09716	2.98476
Aacs	'uc008zrs.1'	2	0.592669	0.440412	1.18365	0.62596
Phgdh	'uc008qps.1'	4	2.03297	2.69695	3.03983	1.62428
Nedd8	'uc007uac.1'	4	2.28594	2.38939	2.63486	2.52248
Aifm1	'uc009tcf.1,uc009tcg.1,uc009tch.1'	5	1.53284	2.50829	3.77419	2.73792
Nt5c	'uc007mhu.1'	2	1.9036	2.29345	3.15221	1.66771
Mcm7	'uc009aeu.1'	6	5.93777	7.09642	7.26654	4.75988
Ankrd10	'uc009kvo.2,uc009kvp.2,uc009kvq.2,uc009kvr.2,uc009kvs.2'	4	1.90839	2.38036	2.7098	1.73624
Nkg7	'uc009gmq.1,uc009gmr.1'	5	3.64149	4.83654	6.78797	4.85979
Actl6a	'uc012coo.1'	5	2.09583	3.25488	4.13863	2.69816
Mthfd1	'uc007nxz.2,uc011yny.1'	5	2.63324	3.46188	4.93257	2.01696
Exosc2	'uc008jdy.1'	5	1.69218	2.9599	3.06801	1.61463
Mrps16	'uc007sjp.1'	5	2.28334	2.28017	2.40844	2.0712
Nop58	'uc007bdy.1'	4	2.40014	3.05449	3.38202	2.20785
Smyd5	'uc009cpq.1'	3	0.499801	1.24953	2.2307	0.833654
Trf	'uc009rgi.1,uc009rgj.1'	2	2.81376	3.17278	4.85904	2.45026
Dynlrb1	'uc008nkg.2'	3	2.13271	2.11582	2.25336	2.05552
Cd48	'uc007doz.1,uc007dpa.1'	4	3.22866	5.16485	6.8964	4.82775
Cd34	'uc007eep.2,uc007eeq.2'	2	2.24761	2.52973	3.46248	2.52968
Nme1	'uc007kxu.1'	5	2.52122	2.84207	3.22292	1.5516
Nup62	'uc009gqw.2'	6	4.11788	4.96028	5.7706	5.00229
Mrpl21	'uc008fwd.1,uc008fwe.1'	6	2.37674	3.2654	3.53384	2.60414
Ruvbl2	'uc009gvc.1,uc009gvd.1'	5	2.18707	3.39563	4.3156	2.82311
Psmd8	'uc009gbb.2,uc009vei.1'	2	1.81832	2.22358	2.9434	2.29071
Pa2g4	'uc007hnl.1'	5	2.13274	2.89638	3.50269	1.79699
Csk	'uc009pvj.1,uc009pvk.1,uc009pvl.1'	2	1.01617	0.586929	1.37404	0.694818
Stip1	'uc008gke.2,uc008gkf.2'	5	1.92467	2.5934	3.3037	2.61724
BC035044	'uc009eet.1'	3	2.37737	3.2398	4.72975	3.96246
Uhrf1	'uc008dbp.2,uc008dbq.2,uc008dbr.1,uc008dbs.1'	6	4.80448	7.12072	7.43748	4.62578
Gart	'uc007zxu.1,uc007zxv.1,uc007zxw.1,uc007zxx.1'	5	1.72529	3.22973	3.82979	2.17062
Puf60	'uc007wij.2,uc007wik.2,uc011zup.1'	3	1.63312	1.50454	2.18362	1.97818
Elp2	'uc008egw.1,uc008egx.1,uc012baj.1'	3	1.86634	2.35092	3.01187	1.73777
Crip1	'uc007pfz.1'	3	2.51392	3.05413	3.75805	3.27843
Ncs1	'uc008jdq.1'	3	1.20554	1.73288	1.82435	-0.0273615
Rpa2	'uc008vbt.1,uc008vbu.1'	6	4.41801	6.18899	6.86483	3.90927
Fam96a	'uc009qel.1,uc012gvo.1'	5	2.00992	2.51418	3.00289	2.83554
Hspd1	'uc007bab.2'	4	2.1205	2.79952	2.99017	1.67759
Hddc2	'uc007etq.1'	3	2.17234	2.04094	2.47169	1.47496
Vdac3	'uc009ldh.2,uc012gbf.1'	5	2.33443	2.68864	3.18087	1.8815
Pfdn2	'uc007doc.1'	2	2.06571	1.60667	2.42644	1.90632
Psmc4	'uc009fxo.2,uc009fxp.1,uc012fgo.1'	6	2.18457	3.19434	3.53524	2.73513
Cct3	'uc008pul.1,uc008pum.1,uc008pun.1,uc008puo.1'	3	2.20305	2.56396	2.8063	2.1985
Dtl	'uc007ecj.1,uc007eck.1,uc007ecl.1,uc007ecm.1,uc007ecn.1,uc011wyu.1'	6	4.413	6.3617	6.54461	3.12845
Prim1	'uc007hla.1,uc011xpx.1'	6	4.62116	6.37161	7.03687	4.34343
Mrpl12	'uc007mta.1'	5	2.13825	4.01171	4.48231	2.63643
Lsm3	'uc009cye.1'	5	2.03523	3.14155	3.63417	2.83443
Exosc8	'uc008pfq.2,uc012cpl.1'	6	2.82854	4.51222	4.99177	4.23397
Shmt1	'uc007jgo.1,uc007jgp.1'	5	3.56281	5.03122	5.70749	2.10026
Tyrobp	'uc009gef.1'	2	1.40125	2.49724	3.43477	1.30858
Sec61b	'uc008sur.1'	4	2.05027	2.22526	2.97002	2.07752
Hat1	'uc008kap.1,uc008kaq.1'	6	3.39472	5.39347	5.85724	3.57414
Dnmt1	'uc009ojn.2,uc009ojo.2,uc009ojp.2,uc009ojq.2,uc009ojr.2,uc009ojs.2'	6	4.2897	4.95157	5.39571	4.07155
Tomm5	'uc008ssh.1,uc012ddl.1'	2	2.71697	3.09578	3.74483	3.1246
Uchl5	'uc007cxe.2,uc007cxf.2'	6	2.28478	3.39882	3.92238	2.43832
Gnl3	'uc007swi.2,uc007swj.2'	3	1.29261	2.21531	2.99578	0.0450931
Phb	'uc007lan.2'	4	1.88915	2.2044	2.33955	0.91295
Dctpp1	'uc009juw.1'	6	4.12115	5.46278	5.74047	3.70215
Slc20a1	'uc008mhi.2,uc008mhj.2,uc008mhk.2,uc008mhl.2,uc008mhm.2'	6	0.896171	2.6192	3.04131	1.17332
Serpinb1a	'uc007pzu.1,uc007pzv.1'	3	2.19209	3.02744	4.05334	3.19256
Cdk6	'uc008wgw.1'	5	2.07032	2.65893	3.06291	2.66969
Sf3b3	'uc009nlb.1,uc009nlc.1,uc009nld.1'	5	2.064	2.64575	2.72774	1.95292
Cops3	'uc007jfa.1'	4	3.24044	3.24007	3.6118	3.18114
	'uc008mks.1,uc008mkt.1,uc008mku.1'	4	1.44592	1.94558	3.60827	2.41838
Eif3l	'uc007wsk.1,uc007wsl.1'	4	1.59214	1.8099	2.40662	2.19793
Fen1	'uc008gpf.1,uc008gpg.1,uc008gph.1'	6	4.11292	6.42238	7.36994	5.33417
Hells	'uc008hjt.1'	6	4.2324	5.67265	6.40956	2.12762
Ranbp1	'uc007ymy.1'	6	3.32416	4.16116	4.5159	2.78466
Rpf2	'uc007ewo.1,uc007ewp.1'	2	1.52037	2.05774	2.79912	2.06354
Aurkaip1	'uc008wey.1'	3	0.932859	2.4422	2.86976	2.51939
Tex30	'uc007avx.2,uc007avy.2,uc007avz.2,uc007awa.2'	6	1.91328	3.53046	4.6184	3.58381
Eif3g	'uc009ojm.1'	5	2.2089	2.90784	3.43475	2.32611
Umps	'uc007zap.1,uc007zaq.1'	6	3.44245	4.89684	5.07437	2.96541
Atp5f1	'uc008qvl.1,uc008qvm.1,uc008qvn.1'	4	1.37126	1.63785	2.24028	1.52181
Dnajc9	'uc007sjn.2,uc007sjo.2'	6	4.57272	5.4039	6.19912	5.38175
Mrpl42	'uc007gwi.1,uc007gwj.1,uc007gwk.1,uc007gwl.1'	5	2.07436	2.67498	3.43011	2.89888
Gmnn	'uc007pwg.1,uc007pwh.1'	6	3.50626	5.94802	6.93575	4.55558
	'uc012esp.1'	4	2.37177	3.24879	3.62449	2.03341
Mrps15	'uc008usf.1,uc008usg.1'	4	1.55175	2.22705	3.28722	2.78285
Hn1l	'uc008azi.1,uc008azj.1'	6	3.20285	4.30179	5.08737	3.30706
Nrm	'uc008cis.1'	6	3.84556	5.45974	6.01703	4.78538
Adh5	'uc008rnk.1'	4	1.33372	2.39671	2.62866	1.9717
Calm3	'uc009fin.1'	5	1.39419	2.08119	2.91706	2.37507
Pold3	'uc009imj.1,uc009imk.1'	6	2.76249	3.61728	4.81835	2.93558
Snrpd1	'uc008eaz.1'	6	2.44064	3.9764	4.13613	3.81032
	'uc008dcl.1,uc008dcm.1'	4	1.42714	1.89561	2.18584	1.46468
Rrp1b	'uc008bvt.2,uc008bvu.2'	3	1.50734	2.4608	2.66616	1.03016
Bccip	'uc009kdi.1'	2	1.85832	1.89749	2.40541	1.68312
Ran	'uc008zsr.1,uc008zss.1'	6	2.2039	2.87049	3.0758	2.69801
Nasp	'uc008ugw.1,uc008ugx.1,uc008ugy.1,uc008ugz.1'	6	2.79345	4.2529	5.66244	2.49078
Mrps21	'uc008qli.1,uc008qlj.1'	3	1.72764	2.71386	3.12066	3.02961
Myc	'uc007vyg.1,uc007vyh.1,uc007vyi.1'	2	1.86013	2.78266	2.83531	0.12223
Paics	'uc008xvn.1,uc008xvo.1'	6	2.37652	2.6258	3.05763	2.10457
Cox6a1	'uc008zdt.1'	5	1.77906	3.15905	4.01431	3.31709
Scarb1	'uc008zrd.1,uc008zre.1,uc008zrf.1'	6	2.35369	2.79976	3.24939	1.64448
Mrpl36	'uc007rdi.1'	4	1.71344	2.93715	3.16043	2.43977
Cox5a	'uc009puz.1'	5	2.51322	3.12842	4.37765	2.91683
Timm8a1	'uc009ugd.1'	6	2.24463	3.95256	4.85021	2.90642
Psma1	'uc009jhy.1,uc009jhz.1'	2	2.31517	2.79825	3.21295	2.35313
Xrcc6	'uc007wxy.1,uc007wxz.1'	2	1.13987	2.05626	2.35801	1.56068
Banf1	'uc008gcr.1,uc008gcs.1'	4	2.16172	2.62018	3.02804	2.42805
Parp1	'uc007dwi.1'	5	2.30085	3.27808	4.09774	2.48937
Ndufb2	'uc009bmc.1,uc009bmd.1'	3	1.9049	1.78931	2.89353	1.92384
Mrpl18	'uc008alj.1'	6	3.37612	4.34916	4.69659	3.51204
Sf3b5	'uc007eki.2'	5	2.10436	2.85534	4.38507	3.14917
Rbmxl1	'uc009mhz.1,uc009mia.2'	5	2.8951	3.31554	3.3754	2.95433
Wdhd1	'uc007thu.2,uc007thv.2,uc007thw.2'	6	3.05158	3.892	5.0957	3.34594
Cox6b1	'uc009gfl.1'	4	1.88824	1.76246	2.59623	2.05365
Ptpn7	'uc007css.1,uc007cst.1,uc011wsh.1'	4	2.00461	2.47552	3.18511	1.60932
Ndufab1	'uc009joh.1,uc009joi.1,uc012ftf.1'	4	2.52009	2.98477	3.39497	2.20603
	'uc009lsd.1'	6	2.63081	3.21363	3.65848	2.7116
Fignl1	'uc007iar.2,uc007ias.2,uc007iat.2,uc007iau.2,uc011xro.1'	6	3.17633	5.22041	6.15746	4.61911
Tmem14c	'uc007qet.2,uc007qeu.2'	6	2.52646	3.35652	3.98405	2.85757
Slc25a12	'uc008kan.1'	2	0.848973	1.93824	2.74723	1.58693
Adsl	'uc007wvz.1'	4	1.75965	2.50738	2.95272	1.46288
Ddx1	'uc007nbh.1'	4	2.40657	2.46636	2.92545	2.70468
Cacybp	'uc007deg.1'	4	2.41412	2.43518	3.08644	2.42382
Fkbp2	'uc008gjt.2,uc008gju.2'	6	3.11127	2.59349	4.79513	4.34384
Tceb2	'uc008atr.1,uc008ats.1'	4	1.58501	2.14622	2.55347	2.541
Fam111a	'uc008guf.1,uc012bja.1'	6	3.02535	4.36375	4.85424	2.90911
Etfb	'uc009gmt.1'	3	1.91027	2.30791	2.55868	2.11714
Psmg2	'uc008fms.1,uc008fmt.1,uc012bek.1'	5	1.02291	2.90473	3.03282	2.74044
Dtymk	'uc007cek.2,uc007cel.1,uc007cem.2'	6	2.9108	4.51137	4.84296	3.12402
Timm50	'uc009fyf.1,uc009fyg.1'	4	1.6095	2.29762	4.32451	1.89414
Ola1	'uc008kcg.1,uc008kch.1,uc008kci.1'	2	0.951818	1.91512	2.46705	1.18704
Psmd2	'uc007yqq.2,uc007yqr.2'	5	1.2601	2.15633	2.49484	1.97629
Nudt5	'uc008ifv.1'	5	2.4401	3.54569	4.38161	2.88775
Chaf1b	'uc008aab.1,uc008aac.1'	6	3.5497	4.1996	4.25323	1.33491
Dut	'uc008mck.1,uc008mcl.2,uc008mcn.1'	6	3.25043	4.85912	5.32401	3.21139
Eif4a3	'uc007mqj.1'	6	1.63344	3.23781	3.69472	2.25668
	'uc007mvk.1'	4	1.44155	2.0838	2.69701	1.75775
Atp5j2	'uc009amk.1,uc009aml.1'	2	1.68498	2.67877	2.71956	2.54767
Fastk	'uc008wrn.1,uc008wro.1,uc008wrp.2,uc008wrq.1,uc008wrr.1,uc008wrs.1'	2	0.83169	0.711569	0.985179	0.539992
Orc6	'uc009mpp.2,uc009mpq.2,uc009mpr.2'	6	2.12824	4.04138	5.68262	3.08298
Nhp2	'uc007iuc.1'	5	2.80488	3.7952	4.46206	2.27566
Dkc1	'uc009tpo.2'	5	2.55037	2.83997	3.40853	2.18162
Mrps18b	'uc008cjg.1,uc008cjh.1'	4	1.44433	2.62261	2.6378	1.78565
Erap1	'uc007rfi.1,uc007rfj.1'	2	1.21902	1.4232	2.12618	0.809926
Siva1	'uc007pev.2,uc007pew.2'	6	3.20499	4.51538	6.3592	2.59828
Cct6a	'uc008zti.1'	5	1.71853	2.58491	2.88162	2.13204
Tuba1b	'uc007xoj.1'	6	2.77664	3.61142	4.54948	3.156
Adk	'uc007slb.1,uc007slc.1,uc007sld.1,uc007sle.1'	5	2.28829	2.98068	4.09297	2.42047
Rpl36al	'uc007nrs.2'	3	2.01743	2.29376	2.56631	1.83156
Ndufb10	'uc008ayd.1'	3	2.31125	1.86873	2.93355	1.73716
Atxn10	'uc007xdd.1'	5	1.17616	2.48256	3.26811	2.67902
Ahcy	'uc008nka.2'	5	2.13723	3.15094	4.16835	3.27118
Timeless	'uc007hlt.2,uc007hlu.2,uc007hlv.2,uc007hlw.2,uc007hlx.2,uc011xqc.1'	6	4.03804	4.62815	5.0686	2.36427
Lta4h	'uc007guq.1,uc007gur.1'	2	2.19135	2.56449	3.17283	2.80311
Erh	'uc007oaz.2,uc007oba.2'	4	1.93705	2.4329	2.7722	1.89982
Lig1	'uc009ffp.1,uc009ffq.1,uc009ffr.1,uc012ezl.1'	6	4.83671	7.02986	7.76353	4.16805
Golt1b	'uc009epg.1'	6	2.34366	3.3619	4.17279	2.26756
Nup85	'uc007mhx.2'	6	3.05274	4.74907	5.6269	4.01599
Rpn2	'uc008now.1'	3	1.57952	1.53345	2.27741	2.10811
Atox1	'uc007izj.1'	3	0.994303	1.37913	2.54297	2.07787
Tra2b	'uc007ysc.1,uc007ysd.1'	6	1.79904	2.11976	2.65885	2.36106
Gins2	'uc009nrd.1'	6	3.77781	6.01491	6.54794	3.91018
Etfa	'uc009psl.2'	5	2.49271	2.88907	3.1792	2.68299
Mif	'uc007ftc.1'	4	2.13703	2.63282	2.95157	1.41022
Fam60a	'uc009etq.1,uc009etr.1'	3	1.58868	1.94644	2.59542	1.93649
Map4k1	'uc009gal.1,uc009gam.1,uc009gan.1'	3	1.14053	2.26316	2.28054	2.10126
Rps27l	'uc009qfm.1'	4	2.07414	3.07541	3.60381	2.73805
Dynll1	'uc008zdp.2'	6	2.30364	2.50863	3.66685	3.11241
Pole3	'uc008tfb.1,uc012dfs.1'	6	2.23781	3.21091	4.04376	3.04645
	'uc007pef.1'	6	2.5268	2.74747	4.12543	3.13617
Cct2	'uc007hcs.1'	5	1.82537	2.611	2.89682	2.4072
Idh3a	'uc009prg.1,uc009prh.1,uc009pri.1'	5	2.04284	3.49423	3.88114	2.19805
Hspa9	'uc008elv.2'	3	1.94385	2.22451	2.72341	2.08955
Alg3	'uc007yqe.2,uc007yqf.2'	4	1.15617	2.04632	2.4312	1.76771
Snrpb	'uc008mij.1'	4	1.90032	2.39137	3.17525	2.73516
Atp6ap1	'uc009tol.2'	2	1.36862	0.465025	2.08245	0.99951
Ppa1	'uc007fge.1'	5	1.44142	3.01395	3.63176	1.77247
G3bp1	'uc007izk.1,uc007izl.1,uc011xva.1'	3	1.35572	1.92189	2.45664	1.39181
Set	'uc008jaw.1,uc008jax.1,uc008jay.1'	5	2.13925	2.69038	3.23678	1.13781
Atp5o	'uc007zys.1'	5	2.4572	2.56193	3.06992	2.56013
Ostc	'uc008rjc.2'	4	1.70028	1.71524	3.38875	2.84612
Impdh2	'uc009rqg.1'	4	2.10227	2.01772	2.5702	2.33609
Bcap29	'uc007nhp.1,uc007nhq.2'	4	1.54073	2.46169	2.75916	1.36745
Itpa	'uc008mjt.1,uc008mju.1'	4	2.48273	2.25207	2.6931	2.56168
Slc19a1	'uc007fvc.2,uc007fvd.2,uc007fve.1,uc007fvf.2'	2	1.59116	1.78836	2.3853	0.694366
Timm23	'uc007syn.2'	4	2.22326	3.18652	3.46846	1.8123
Sucla2	'uc007upw.1,uc007upx.1,uc007upy.1'	4	1.14488	1.73271	2.39848	2.36522
Pola1	'uc009tss.2,uc009tst.1,uc009tsu.1,uc012hly.1'	6	2.00842	3.66821	5.19385	2.83008
H2afz	'uc008rmo.1,uc008rmp.1'	6	1.74481	2.41415	3.27985	3.23571
Timm13	'uc007gfi.2'	4	1.98031	2.96286	3.22318	2.10159
Sdhb	'uc008vnl.1'	4	2.21585	2.17695	2.80735	2.66427
Anapc13	'uc009rft.2'	4	1.73797	2.13496	2.26706	1.81393
Denr	'uc008zor.1'	3	1.73735	1.15053	2.11599	1.64846
Pomp	'uc009aoj.1,uc009aok.1'	2	1.59412	1.47241	1.66136	1.63913
Wdr43	'uc008dmr.2,uc008dms.2'	2	0.883911	1.65333	1.71606	0.894677
Hspe1	'uc007bac.2'	5	2.01453	2.74207	3.8859	1.22546
Pold1	'uc009gpx.2,uc012fjq.1'	6	2.68542	3.77319	4.96807	2.81182
Eif4e	'uc008rnn.1'	3	1.45732	2.07253	2.41279	2.39083
Bid	'uc009dnv.1,uc012esb.1'	2	2.07967	2.23376	2.88272	1.7508
	'uc007myi.1'	3	1.60345	1.66097	2.96655	2.50944
Nolc1	'uc008hsg.1,uc008hsh.1,uc008hsi.1,uc008hsj.1'	5	2.27289	3.0679	3.16602	1.7286
Apitd1	'uc008vvt.2,uc008vvu.2'	6	3.15206	4.13404	5.42153	3.42449
Eif6	'uc008nll.1'	3	1.16883	2.6946	2.72436	1.74949
Pgk1	'uc009ubo.1'	4	2.44804	2.55065	2.87546	2.15492
Snrpg	'uc009crm.1,uc009crn.1'	3	1.91735	2.13727	3.03942	2.56889
Psmd13	'uc009kim.1,uc009kin.1'	5	2.27505	2.60941	2.97939	2.76515
Gng5	'uc008rrk.1'	2	1.22819	1.15206	1.93163	1.52757
Lgals9	'uc007kkd.2,uc007kke.2'	4	1.95381	2.32788	3.05411	2.87688
Me2	'uc008fox.1,uc008foy.1,uc012beu.1'	6	1.81412	2.97185	4.18433	2.0036
Nmral1	'uc007yae.1,uc007yaf.1'	6	2.32481	4.54663	4.71433	2.94451
Nop2	'uc009dtn.2'	4	1.72675	2.54136	2.5468	0.385882
Hprt	'uc009ter.1'	4	1.94738	2.5711	3.31007	2.43622
Psat1	'uc008gwn.1,uc008gwo.1,uc008gwp.1'	6	2.07449	3.07925	4.95954	3.33294
Cycs	'uc009bxc.1'	5	2.02854	2.92137	3.43629	1.91773
Ndufa4	'uc009ayd.1'	2	1.98082	2.35921	3.22436	2.21068
Psmd10	'uc009ulj.2,uc012hpo.1'	2	1.39235	1.03607	1.97428	1.86211
Nme2	'uc007kxs.1,uc007kxt.1'	3	2.51484	2.34324	3.0425	2.09253
	'uc007lyn.1'	4	1.92426	2.64741	3.15921	2.99318
Exosc5	'uc009fti.2,uc009ftj.2'	3	2.0911	2.93216	3.72028	2.34386
	'uc008hwy.2'	6	1.65345	2.51023	3.33809	2.07687
Psma4	'uc009pru.1'	3	1.74326	1.7615	2.0893	1.79307
Bop1	'uc007wkf.1'	4	1.32174	1.35086	1.84115	1.75672
Mlec	'uc008zdf.2'	2	0.90532	1.03837	1.45744	1.40459
Srrt	'uc009acb.2,uc009acc.2,uc012eew.1'	5	1.55569	1.49372	1.70048	1.32063
Arpc5l	'uc008joa.1'	3	1.67907	2.00941	2.70659	1.90986
Polr2j	'uc008zzw.2'	6	2.55621	2.22099	3.4538	3.36676
Rbm3	'uc009sny.2,uc009snz.2,uc009soa.2,uc009sob.2,uc009soc.2,uc009sod.2'	2	1.68053	1.92829	2.04472	1.76772
Ndufs7	'uc007gci.1'	4	1.2374	2.40924	2.57357	2.34291
Uqcr10	'uc007hvb.1'	6	2.14726	2.73061	3.71324	3.11993
Usp14	'uc008ean.1,uc008eao.1,uc008eap.1'	4	1.5583	2.00711	2.62752	1.45653
Rad54l	'uc008ufz.1,uc008uga.2,uc008ugb.2,uc008ugc.2,uc008ugd.2,uc008uge.2'	6	2.51492	3.88388	5.92349	3.41075
Rpn1	'uc009cva.2'	5	1.99216	3.10039	3.56833	2.45619
Mrpl28	'uc008bdl.2,uc012anr.1'	4	1.82219	2.64889	4.39072	3.29787
Cox5b	'uc007aqw.1'	4	1.30467	2.3899	3.4818	3.10864
Pola2	'uc008ggb.2,uc008ggc.2,uc008ggd.2,uc008gge.2,uc008ggf.2,uc008ggg.2'	6	1.61356	3.07352	4.34762	2.36462
Nop10	'uc008lor.1'	4	1.98051	2.39431	2.56387	1.50902
Psma6	'uc007noq.2'	4	1.55739	2.35111	2.85102	2.73926
Hint1	'uc007iyj.1'	4	2.02347	2.44784	2.98717	2.26928
Ppil1	'uc008bsm.1'	6	2.53001	4.68019	5.22876	3.20056
Nudc	'uc012dmm.1'	5	2.10192	3.02505	4.37765	2.5238
Srsf10	'uc008vha.1,uc008vhb.1,uc008vhc.1,uc008vhd.1'	3	2.09489	2.62624	3.06847	2.15933
Ywhah	'uc008xag.2'	6	2.75971	3.3855	3.73141	2.77667
Snrpd2	'uc009fkv.1'	3	2.2807	2.89516	3.51379	2.89835
Dek	'uc007qhv.2,uc007qhw.2,uc011yyz.1'	5	1.77394	3.00954	3.57702	3.22252
	'uc007ohf.1'	4	1.29498	2.569	2.9216	1.3096
Cdc7	'uc008ylw.1,uc008ylx.1,uc008yly.1,uc012eak.1,uc012eal.1'	6	2.99673	3.96792	5.06368	3.54467
Nudt21	'uc009mvo.1'	4	1.60722	2.90868	3.25559	3.23804
Naa10	'uc009tng.2,uc009tnh.2,uc009tni.2'	5	1.9594	2.22489	3.37301	1.80035
Tcp1	'uc008alk.1,uc008all.1,uc008alm.1,uc008aln.1'	4	1.56151	2.92836	3.34107	2.74499
Rnaseh2b	'uc007ugl.1'	5	3.23437	3.1838	3.4605	2.0251
Rfc4	'uc007yth.1,uc007yti.1,uc007ytj.1'	6	3.01103	5.99789	7.14277	5.10586
Shmt2	'uc007hju.1,uc007hjv.1'	4	2.46866	3.19416	4.00059	2.21472
Nipsnap3b	'uc008swt.1'	5	1.55986	1.96847	2.31176	1.54798
Mir686	'uc007twl.1,uc007twm.1,uc011zlb.1'	3	1.54614	2.4351	2.70826	2.44466
Rpl39	'uc009syc.1'	2	1.11784	1.23448	1.69937	1.40217
Hnrnpf	'uc009dle.2,uc009dlf.2,uc009dlg.2,uc012eqx.1,uc012eqy.1,uc012eqz.1,uc012era.1'	3	1.37854	1.57135	1.66603	1.27696
Slc29a1	'uc008cra.2,uc008crb.2,uc008crc.2,uc008crd.2,uc008cre.2,uc008crf.2,uc012aud.1,uc012aue.1'	4	2.67553	3.58767	4.47112	2.36871
Fam162a	'uc007zcd.1'	5	1.76811	2.53154	3.04437	1.22012
Ap1s1	'uc009abm.1'	4	2.01044	2.01024	3.57961	2.12871
Snora74a	'uc008eme.1,uc008emf.1,uc012bbh.1'	3	1.29107	1.98574	2.60542	0.571372
Stra13	'uc007muc.1,uc007mud.1'	6	1.55838	2.84748	4.4215	3.56706
Uqcrq	'uc007ivy.2,uc007ivz.2'	4	1.85403	2.96328	4.62969	3.19589
Cuta	'uc008bex.1,uc008bey.1,uc008bez.1'	6	2.15001	3.07193	3.14866	2.20208
Romo1	'uc008nmm.2,uc008nmn.2,uc012chq.1'	5	1.10381	2.72807	2.72855	1.43143
Ctps	'uc008unj.2'	6	1.52804	3.0169	3.2043	1.31642
Rnaseh2a	'uc009mok.1,uc009mol.1'	6	1.83945	2.81722	3.39108	1.90826
Sdf2l1	'uc007ykc.2'	6	2.14891	3.06696	4.64619	1.7846
Eif1ax	'uc009usl.1'	3	2.45437	2.69131	3.06442	2.1918
Gtf2f2	'uc007urb.1'	4	1.244	1.44423	2.40409	1.42484
Gps1	'uc007muo.2,uc007mup.2,uc007muq.1'	5	1.2176	2.66584	3.1089	1.98535
Uqcr11	'uc007gdd.1,uc007gde.1'	3	1.65106	1.69478	2.62055	2.23546
Grpel1	'uc008xep.1'	5	1.22223	1.73846	3.01327	2.22454
Pgam1	'uc008hml.1'	2	2.00921	2.59322	3.04098	2.46353
	'uc009nza.1'	3	1.65193	2.27982	2.88799	1.5785
Txn1	'uc008syp.1'	5	1.98151	2.77404	3.5721	2.78619
Aimp2	'uc009akw.2,uc009akx.2'	3	1.92649	2.78919	3.15519	2.52755
Cox6c	'uc007vmi.1'	3	1.98839	2.29733	2.87	2.37918
Mrps28	'uc008ooq.2'	5	1.90393	2.39245	2.72314	2.45591
Immt	'uc009che.1,uc009chf.1,uc009chg.1,uc009chh.1,uc009chi.1,uc009chj.1,uc009chk.1,uc009chl.1,uc009chm.1,uc009chn.1,uc009cho.1,uc012eng.1'	3	1.38173	1.64763	1.9504	1.40957
Stub1	'uc008bcf.1'	4	1.874	2.20296	3.43561	2.23583
Atp5e	'uc008off.1'	2	2.06461	2.1013	3.11291	1.95068
Thyn1	'uc009oqa.2,uc009oqb.2,uc009oqc.2'	4	1.80585	1.94533	3.05069	2.73957
Ahsa1	'uc007oit.1'	4	1.7103	2.71479	3.30864	2.365
Snrpa1	'uc009hgy.2,uc009hgz.2'	5	1.80813	3.02271	3.5964	3.09239
Nt5c3l	'uc007llc.1,uc007lld.2,uc007lle.2,uc007llf.2,uc007llg.1'	6	2.41489	3.12261	3.98925	1.84257
Cyc1	'uc007wjs.1,uc007wjt.1'	6	1.89927	2.56146	3.68299	2.4439
Naa20	'uc008mrx.2,uc008mry.2'	3	1.48131	2.36582	3.22637	2.21685
S100a10	'uc008qfk.1'	2	2.12134	1.75376	2.89146	2.26846
U2surp	'uc009rba.2,uc009rbb.2,uc009rbc.1,uc009rbd.1,uc009rbe.1'	2	1.54957	1.20553	1.58199	1.04607
Hsp90aa1	'uc007pbq.1,uc007pbr.1'	4	1.55953	2.1484	2.51216	1.64598
Slc7a6	'uc009nfl.1,uc009nfm.1,uc009nfn.1,uc009nfo.1'	5	1.70348	1.86445	2.43219	0.592204
Fkbp4	'uc009edr.1'	4	2.39773	2.95076	3.66149	1.62802
Eef1d	'uc007whj.1,uc007whk.1,uc007whl.1,uc007whm.1,uc007whn.1,uc007who.1'	2	1.63399	1.82197	2.42587	1.42697
	'uc008bfk.1'	4	1.47212	3.08001	3.44293	2.56177
Haus5	'uc009gfs.2,uc009gft.2'	6	2.37417	4.176	5.92869	4.25228
Ndufb4	'uc007zei.1'	3	1.3112	2.18542	2.55636	1.87709
Wdr74	'uc008gmm.1,uc012bie.1'	2	1.82515	2.14402	3.16456	1.95067
	'uc008gnt.1'	5	1.51406	2.24983	3.24875	2.18313
Slc25a5	'uc009sxs.1'	6	1.59801	2.03946	2.36668	1.49491
Rfc5	'uc008zfs.1,uc008zft.1'	6	2.75937	5.09765	6.06691	4.67585
Dcakd	'uc007ltb.1,uc007ltc.1'	5	1.54242	2.27691	2.96206	1.27362
Rnf7	'uc009rcm.1'	4	1.84491	1.50807	3.13848	2.07353
Cetn2	'uc009tkt.1,uc009tku.1'	4	1.20606	1.45235	2.12239	1.95211
Prmt5	'uc007twf.2,uc007twg.2'	3	0.800693	2.08079	2.51098	2.07791
Dbi	'uc007cje.1,uc007cjf.2'	5	2.31934	2.74579	3.8661	2.95099
Snrpe	'uc007cql.2'	6	1.5649	2.76391	3.09239	2.88755
Prmt7	'uc009nft.1,uc009nfu.1,uc009nfv.1,uc009nfw.1'	3	1.5979	2.51374	2.6265	1.96423
Nhp2l1	'uc007wya.1'	4	1.61982	2.79742	3.09917	2.41548
2014-09-07	'uc009opk.1,uc009opl.1,uc009opm.1'	2	0.798457	1.09304	1.72912	1.67372
Lyar	'uc008xgg.2,uc008xgh.2,uc008xgi.1'	5	1.55172	2.82021	3.25404	2.88176
Cpsf3l	'uc008wfh.1'	5	1.20298	2.51455	2.93689	2.3024
Ndufs8	'uc008fxn.1,uc008fxo.1,uc008fxp.1'	2	1.74091	1.50257	2.26108	2.2419
Anapc5	'uc008zmf.1,uc008zmg.1,uc008zmh.1,uc008zmi.1,uc008zmj.1,uc008zmk.1,uc008zml.1,uc008zmm.1,uc012edb.1'	4	1.89366	1.9711	2.89604	2.09664
Syncrip	'uc009qyo.1,uc009qyp.1,uc009qyq.1,uc009qyr.1'	5	1.4383	1.90397	2.56004	2.18955
Exosc1	'uc008hmm.2,uc008hmn.2,uc008hmo.2'	2	1.70452	2.06486	2.49757	1.5891
Chchd4	'uc009cyb.1'	3	1.80623	2.61859	2.76432	1.17552
Cdc37	'uc009okg.1,uc009okh.1'	3	1.18323	2.07857	3.03164	1.94673
Pes1	'uc007hua.1'	2	1.3444	0.965248	2.17293	1.75736
Hspa14	'uc008ief.1,uc008ieg.1'	6	2.20921	3.74271	4.53906	3.76433
Oxct1	'uc007vck.2,uc011zqu.1'	6	2.01022	2.35552	3.4251	3.40639
Rfc3	'uc009aus.1,uc009aut.1,uc009auu.1,uc009auv.1'	6	2.63617	4.27977	5.16264	2.13649
Cisd1	'uc007foq.1'	6	2.28316	3.09834	3.3296	1.10627
Atp5g1	'uc007lbf.2,uc007lbg.2'	6	1.71762	2.69228	3.14276	1.91596
Myg1	'uc007xvi.1,uc007xvj.1'	5	1.83422	2.77487	3.78645	1.91004
Ifrd2	'uc009rmd.1'	2	1.83927	1.93675	2.92397	1.26898
Mrps27	'uc007rpn.1'	3	1.13236	1.4553	3.16417	1.42952
Uchl3	'uc007uvv.1,uc007uvw.1'	4	1.59569	2.369	3.53886	1.55122
Commd4	'uc009pul.1,uc009pum.1'	2	1.38492	1.4403	2.22267	1.90603
Edf1	'uc008isn.1'	4	1.26434	1.98336	3.0811	2.46851
Nutf2	'uc009nej.1'	5	2.00931	2.43132	2.69837	1.82411
Naa38	'uc009bao.1'	5	2.09537	2.69433	3.76327	3.07324
Chek1	'uc009otv.1,uc009otw.2,uc009otx.2'	6	2.34717	3.26267	3.28296	1.74453
Cdk4	'uc007hhv.2'	5	2.22577	2.49726	2.72038	1.78909
Snrpd3	'uc007fqm.1'	4	1.77042	2.20989	2.88057	2.47316
Tmem147	'uc009gga.1,uc009ggb.1'	3	2.11527	2.16033	3.18131	1.59936
Grwd1	'uc009gxj.2,uc009gxk.2,uc012fkr.1'	4	1.91153	2.40671	3.57616	2.12626
Ssb	'uc008jyt.2,uc012bws.1,uc012bwt.1'	2	1.45266	1.68335	1.73553	1.29468
D2Wsu81e	'uc008jbl.2,uc008jbm.2,uc008jbn.2'	4	2.07125	2.15872	3.39697	1.32808
	'uc008cbs.1'	2	1.59826	1.75591	2.49644	2.32536
D17Wsu104e	'uc008dbg.1'	5	2.70631	2.00076	3.18654	2.63527
Aaas	'uc007xvk.2,uc007xvl.2'	6	2.32025	3.54948	4.35469	4.18581
Snrpf	'uc007guw.2'	4	1.45173	1.63622	2.28473	1.64606
Atpif1	'uc008vbl.2'	6	1.65483	1.96027	2.43434	1.67363
Atp5l	'uc009per.2,uc009pes.2'	2	1.64034	1.8315	2.35735	2.19915
Rqcd1	'uc007bmf.2'	6	2.05398	3.49276	3.87276	2.85789
Glrx3	'uc009kew.1,uc009kex.1'	3	2.0124	1.88075	2.0375	1.27803
Ebna1bp2	'uc008ukn.2,uc008uko.1'	3	1.02537	1.81146	2.27495	1.27744
Eif1ad	'uc008gct.1'	3	1.35165	2.48084	3.53506	1.52276
Magoh	'uc008uaj.1'	3	2.41074	2.32589	4.09652	2.88229
H2afy	'uc007qsf.2,uc007qsg.2,uc007qsh.2,uc007qsi.2,uc011yzz.1,uc011zaa.1'	2	1.35893	2.18769	2.79226	1.94973
Ndufs6	'uc007rdg.2,uc007rdh.2'	5	1.5888	2.69964	3.78139	3.06616
Ndufa2	'uc008eoj.1'	4	1.8672	3.03097	3.49027	3.08658
Erp29	'uc008zjd.1,uc008zjf.1,uc008zjg.1'	2	1.75306	1.74338	3.05965	2.30098
Calr	'uc009mnp.1'	2	1.40382	1.81852	2.43257	1.99174
Psmd7	'uc009nhz.2,uc009nia.1'	3	1.56063	2.70344	2.80505	2.00675
Gcsh	'uc009not.1'	4	1.23704	1.80986	2.215	1.30268
Bex6	'uc007yyk.1'	2	1.51265	3.04467	4.17558	3.37099
Haus4	'uc007twh.2'	6	2.1459	3.01603	4.62219	3.21121
Rdbp	'uc008cdv.1,uc008cdw.1,uc008cdx.1'	4	1.65479	1.93757	3.93154	1.81132
Cyb5b	'uc009nhg.1,uc009nhh.1'	3	1.18584	2.58015	3.64109	1.77106
Tomm7	'uc008wqs.2'	6	1.09964	2.06728	2.45206	1.87488
Msh2	'uc008duz.1,uc008dva.1,uc008dvb.1'	6	2.37253	2.72776	2.92713	1.35548
Psmc2	'uc008wpd.1'	4	2.04314	1.84319	3.20205	2.81168
Lmnb1	'uc008eyu.1,uc012bdd.1'	6	1.53192	2.88571	3.25184	2.92766
Stmn1	'uc008vfc.2'	6	1.95298	2.4862	3.31274	2.95585
Rpa3	'uc009axl.2'	6	2.26024	3.94109	4.75498	3.60951
Zwint	'uc007foy.1,uc007foz.1,uc007fpa.1'	4	2.2037	2.31878	3.81145	2.66533
Acly	'uc007llk.2,uc007lll.2,uc007llm.2'	4	1.38405	2.18433	2.39936	1.60467
G6pc3	'uc007lqt.1'	4	1.57452	2.05844	3.13986	1.70457
Aarsd1	'uc007los.1'	6	1.53313	3.53547	5.65006	3.16922
Ak2	'uc008uvt.1,uc008uvu.1'	6	2.00188	2.91014	2.94134	2.24861
Taf1d	'uc009ofp.2,uc009ofq.2,uc009ofr.2,uc009ofs.2'	3	1.45785	1.11671	2.18503	1.72064
Rfc1	'uc008xni.2,uc008xnj.2,uc008xnk.2,uc008xnl.2,uc008xnm.1'	6	1.97914	2.53344	3.05968	2.19891
Sumo3	'uc007fvy.1,uc007fvz.1'	5	1.67586	2.3936	2.47232	1.46231
Ndufb8	'uc008hpv.1,uc008hpw.1'	2	1.59559	1.84941	2.28508	1.62325
Smu1	'uc008shu.2,uc008shv.2'	3	1.1642	1.14186	2.24734	1.77676
Sh3bgrl3	'uc008vec.1'	2	1.2959	1.56297	1.59937	1.37916
Pold2	'uc007hxk.2'	6	2.12076	3.91209	5.97566	2.53136
Lage3	'uc009toq.1,uc009tor.1'	4	1.47371	2.0967	2.45532	1.90908
Prim2	'uc007anq.1,uc007anr.1'	6	2.39612	4.69797	6.60221	3.92949
Chchd1	'uc007skm.2,uc007skn.2'	4	1.95319	2.81024	3.70057	3.21158
Tmed3	'uc009qzo.2'	3	1.44414	2.30287	3.68629	2.23551
Ngfrap1	'uc009uik.2,uc009uil.2,uc012hov.1'	4	1.98425	2.38196	2.84434	1.46038
Hnrpdl	'uc008ygx.1,uc008ygy.1,uc008ygz.1'	3	1.40044	1.98403	3.00426	2.28091
Tuba4a	'uc007bok.1'	6	2.43494	2.91536	4.50951	3.61853
Rpp21	'uc008ckq.1,uc008ckr.1'	4	1.96671	1.95533	2.79055	2.38112
Psmc3	'uc008kuf.2'	3	1.61425	1.52363	3.47195	2.44055
Psmd4	'uc008qhr.1,uc008qhs.1,uc008qht.1,uc008qhu.1,uc008qhv.1'	2	1.68702	1.83942	2.54125	1.93085
Uba2	'uc009git.1,uc009giu.1,uc009giv.1'	6	2.48799	3.76745	4.42003	2.53463
Ddost	'uc008vkt.1'	3	1.34879	2.32725	3.06988	1.68852
Zc3h15	'uc008khx.1,uc008khy.1,uc008khz.1'	5	1.08179	1.48609	1.69749	1.21663
Psme2	'uc007tzg.1,uc007tzh.1'	3	1.38442	2.15044	2.22902	1.49321
Phb2	'uc009drh.1,uc009dri.1'	5	1.41121	2.3361	3.55131	2.69468
Mfsd10	'uc008xct.1,uc008xcu.1,uc008xcv.1,uc008xcw.1,uc012duy.1,uc012duz.1'	4	1.5347	2.43649	3.11435	1.04903
Exosc7	'uc009sfv.1'	3	2.26027	2.95677	3.31764	1.94904
Vrk1	'uc007ozb.1,uc007ozc.1,uc007ozd.1,uc007oze.1'	4	2.05594	2.66884	3.50447	2.86537
Ezh2	'uc009btb.2,uc009btc.2,uc009btd.1'	5	1.84767	2.08016	3.98456	2.87872
Dhodh	'uc009nio.1,uc009nip.1,uc009niq.1,uc009nir.1,uc012gkj.1'	4	1.25061	2.23398	3.44384	1.21412
Lsm6	'uc009mie.2,uc009mif.2'	6	1.20351	2.07584	2.82893	2.29574
BC048355	'uc008csz.1'	4	1.58715	2.29857	4.00563	2.26765
Polr1b	'uc008mhf.2'	2	0.653788	1.23615	1.42916	0.691997
Ncbp1	'uc008stj.1,uc008stk.1,uc008stl.1'	5	1.21825	1.38482	2.06778	1.88364
Gm16286	'uc008fsn.1,uc008fso.1,uc008fsp.1,uc008fsq.1'	2	1.09323	1.28289	1.48516	0.776697
Cdc123	'uc008ift.1,uc008ifu.1'	3	0.984842	2.61511	3.05398	2.02977
Uqcrb	'uc007qzu.1'	2	1.37311	1.95735	2.29587	1.82881
Sfxn1	'uc007qoa.2'	3	1.8483	2.56434	3.0092	1.34877
Tmsb10	'uc009cjf.2,uc009cjg.2,uc012enk.1'	2	1.28885	1.65614	1.95742	1.47979
Bcap31	'uc009tmj.1'	2	1.50665	1.01613	1.70128	1.25704
Cbx1	'uc007lck.1,uc007lcl.1,uc007lcm.1'	2	1.57458	1.6544	2.53253	2.25982
Mrpl33	'uc008wyt.2,uc008wyu.2'	5	1.81348	2.99586	4.34935	3.36532
Ivns1abp	'uc007cym.1,uc007cyn.1,uc007cyo.1,uc007cyp.1'	2	1.43524	1.7346	1.80916	0.973839
Cox7c	'uc007riy.1'	4	1.51289	1.80771	2.51925	1.78664
Atp5g3	'uc008kdm.1'	6	1.98128	2.82212	3.40628	2.05134
Cbx5	'uc007xxl.1,uc007xxm.1,uc007xxn.1'	6	1.94657	2.54014	3.61313	2.55859
Idh2	'uc009hzm.1,uc009hzn.2'	3	2.373	2.65637	3.0368	1.56203
Ppp1r7	'uc007cdv.1'	4	1.52727	1.68325	2.1239	1.69812
Srpk1	'uc008brh.1,uc008bri.1,uc008brj.1'	4	2.12215	2.41971	2.62234	1.79582
Aprt	'uc009ntf.1,uc009ntg.1,uc009nth.1'	3	1.06017	1.60928	1.96923	0.787756
Ints7	'uc007eco.1,uc007ecp.1,uc007ecq.1,uc007ecr.1'	4	1.46248	2.7027	3.06672	1.9922
Itpripl1	'uc008meu.2,uc008mev.2,uc008mew.2'	5	1.488	2.21209	2.90956	1.51827
Lrdd	'uc009klc.1,uc009kld.1,uc009kle.1,uc012fxb.1,uc012fxc.1'	6	1.51622	1.77755	3.42123	1.07852
Rbbp7	'uc009uuf.2,uc009uug.2'	5	2.25597	3.23968	3.2538	2.43121
	'uc008tac.1,uc008tad.1'	3	1.45321	2.32273	2.61299	2.22117
P4hb	'uc007mti.1'	3	1.91357	2.60508	2.91407	1.75352
Tfdp1	'uc009kxp.1,uc009kxq.1,uc009kxr.1,uc009kxs.1,uc009kxt.1,uc012fzy.1'	6	2.52049	2.94262	3.67738	2.54145
Ipo5	'uc007uzy.1,uc007uzz.1'	5	1.57149	2.90554	5.00793	2.68686
Usmg5	'uc008huo.1'	4	1.6601	2.25183	3.26981	2.54044
Ndufs5	'uc008upu.1'	3	1.56949	1.20596	2.67094	2.30578
Sarnp	'uc007hoq.2,uc007hor.2,uc007hos.2,uc011xqk.1'	2	1.3748	1.39579	2.39071	2.11939
Hnrnpm	'uc008bzc.2,uc008bzd.2,uc008bze.2,uc008bzf.2,uc008bzg.2,uc008bzh.2'	3	1.11625	1.87224	2.51757	1.91408
SNORD88	'uc009gos.2,uc009got.2,uc009gou.2,uc009gov.2,uc009gow.1,uc009gox.2,uc009goy.1,uc012fjm.1'	2	0.993493	1.45625	1.46736	-0.813384
Nxt1	'uc008mtf.2,uc012cfn.1'	6	1.7905	3.12112	4.2511	3.43636
Farsb	'uc007bqf.1,uc007bqg.1,uc007bqh.1,uc007bqi.1'	5	1.16416	1.95048	2.89607	2.70355
Mrpl40	'uc007yop.2'	5	0.678945	1.96509	3.50599	2.53304
Brd3	'uc008ixl.2,uc008ixm.2,uc008ixn.2,uc008ixp.1,uc008ixq.1'	3	1.30629	1.54925	1.9636	1.3625
Ndufv1	'uc008fye.1'	4	2.09809	1.98502	2.8923	2.69956
Pprc1	'uc008hsb.1,uc008hsc.1,uc008hsd.1,uc008hse.1,uc008hsf.1'	3	1.37179	1.46477	1.49583	0.501535
Rbm43	'uc008jqk.2,uc008jql.2,uc012bvi.1'	3	1.52045	1.16139	1.84566	1.4407
	'uc007jdg.2,uc011xvm.1'	2	1.52383	1.80898	2.07991	1.17536
Psmb3	'uc007leo.1,uc007lep.1'	2	1.60878	1.81296	2.30843	1.94969
Ndufb7	'uc009mkk.1'	5	1.92274	2.44284	3.37115	2.65735
Dck	'uc008yah.1'	5	1.22839	2.40763	4.22241	2.26466
Cfdp1	'uc009nmx.1'	4	1.81447	1.66065	2.50674	1.68726
Ndufc1	'uc008pdy.1'	3	1.99644	1.97597	3.68921	1.84064
Cox7b	'uc009ubk.1'	2	0.763851	1.89649	2.11631	1.50629
Gatm	'uc008maw.2'	5	2.15013	2.89848	5.05454	1.16675
Bckdk	'uc009jxf.1'	5	2.08697	2.90247	3.1806	2.90886
	'uc008oql.1,uc008oqm.1,uc008oqn.1'	3	1.09245	2.83768	3.02913	1.79321
Ywhaq	'uc007ndw.1,uc007ndx.1,uc007ndy.1'	3	2.03751	2.03476	2.29245	1.85115
Psma7	'uc008oib.1'	3	1.28895	1.68349	1.81394	1.45167
Suv39h1	'uc009snp.2,uc009snq.2,uc009snr.1'	6	2.25019	4.27859	4.37341	4.22613
Gpaa1	'uc007wjq.1,uc007wjr.1'	6	1.85163	2.71616	4.02853	1.95604
Stoml2	'uc008soy.1'	4	1.56193	1.75258	3.48456	1.90184
Acot7	'uc008vzx.2,uc008vzy.2,uc008vzz.2,uc008waa.2'	3	1.01854	1.97754	3.45643	2.46021
Mybbp1a	'uc007jyy.1,uc011xyj.1'	4	0.620804	2.03131	2.29951	1.40567
Atp5h	'uc007mhm.1'	3	1.16829	1.95814	2.36586	1.36408
Ppat	'uc008xvl.2,uc008xvm.2'	6	2.07298	3.12825	4.16713	1.72603
Ada	'uc008ntl.1'	2	1.43936	1.85537	2.11873	0.697298
Ndufa9	'uc009dve.2'	3	1.88455	1.78041	3.25642	2.87334
Acd	'uc009ndp.1,uc009ndq.1,uc009ndr.1,uc009nds.1,uc009ndt.1,uc012gjn.1'	2	1.45343	1.63696	1.88357	0.744213
Ndufa12	'uc007gvq.1'	4	1.7035	1.97585	2.34461	2.07576
Ptrh2	'uc007ksy.1,uc007ksz.1'	3	1.29068	1.67309	2.061	1.09226
Vps16	'uc008mja.2,uc008mjb.2,uc012cef.1,uc012ceg.1'	6	1.91423	1.58713	3.15803	2.44242
Psmc3ip	'uc007lnh.1,uc011yfh.1'	6	1.79265	3.9128	5.04227	1.54816
Nme4	'uc008bdh.1,uc008bdi.1'	3	1.55285	2.00529	3.29244	1.1371
Ppid	'uc008pnp.1'	2	1.4275	2.08791	2.36502	1.83288
Ssr4	'uc009tmr.2,uc009tms.2'	3	2.06787	2.49192	2.55474	2.00478
Arl2	'uc008gho.1'	5	1.58511	1.8025	3.24099	2.30779
Polr2e	'uc007gbi.1'	2	1.429	1.76949	2.98099	1.73131
Eif3c	'uc009jrw.1'	2	1.2201	1.40239	1.64509	1.43124
Supt16h	'uc007tor.1'	6	1.37752	2.69332	3.11695	2.80002
Eed	'uc009igk.2'	4	1.58019	2.09872	3.3926	2.15095
	'uc007yfb.1'	3	1.35624	1.91067	2.09687	1.24222
Abce1	'uc009mit.1,uc009miu.1'	3	1.44808	2.02739	2.65086	1.91093
Gng12	'uc009cew.2,uc009cex.2,uc009cey.2,uc009cez.2,uc009cfa.2,uc009cfb.2'	2	1.07277	1.34872	2.29455	1.97452
Mrpl14	'uc008crj.1'	6	1.90689	3.16761	3.7319	1.48125
Mrto4	'uc008vmd.1,uc008vme.1,uc012dns.1'	3	1.74884	2.18111	3.33387	1.53707
St13	'uc007wwl.1,uc007wwm.1'	3	1.55356	1.01201	2.18147	2.06718
Ipo7	'uc009jet.1,uc009jeu.1,uc009jev.1'	5	1.32843	2.06431	3.36786	1.76035
Snhg3	'uc008vbf.2'	4	1.62304	1.86412	2.02628	1.27276
Ifi27l1	'uc007ovo.2,uc007ovp.2,uc007ovq.2,uc007ovr.2,uc007ovs.2,uc007ovt.2'	2	1.52933	1.60776	2.05811	1.64211
Bola2	'uc009jsj.1'	5	1.44924	2.10982	3.64065	1.89045
	'uc008lzf.2'	2	0.973885	1.90077	2.26884	1.38029
Psmd1	'uc007buy.1'	2	1.32322	2.07003	2.44411	1.69644
	'uc008nsq.2,uc008nsr.1'	5	1.87357	2.97943	3.52376	2.38271
Rbx1	'uc007wwq.1'	3	1.1767	1.39939	1.77646	1.44548
Fabp5	'uc008opg.1'	4	1.29133	2.71019	3.54988	1.57728
Phf5a	'uc007wxo.1'	6	1.52463	2.76005	3.4505	2.21492
Osgep	'uc007tlx.1'	5	1.86899	1.87973	3.28345	2.54484
Mrpl2	'uc008ctm.1,uc008ctn.1'	4	1.2619	1.96973	3.40041	2.57802
Pitpnb	'uc008ysb.1,uc008ysc.1'	2	1.67463	1.73061	2.27106	2.2024
Stk16	'uc007boh.2,uc007boi.2,uc007boj.1'	2	1.02651	1.23126	2.64508	2.47676
Eif3d	'uc007wom.1'	2	1.35141	1.62409	2.39062	1.99057
Hdac3	'uc008erl.1'	5	1.04559	1.93079	2.62539	1.47698
Mrps17	'uc008ztb.1,uc008ztc.1,uc008ztd.1,uc008zte.1'	3	1.51275	1.71695	2.35846	2.25668
Ost4	'uc008wwk.1,uc012dug.1'	2	1.22937	1.14999	1.35194	1.19294
Atp5j	'uc007zth.1,uc007zti.1'	5	1.43067	1.90882	2.71865	2.5552
Timm8b	'uc009pjw.2,uc009pjx.2'	2	1.30306	1.42929	2.66747	2.33516
Sf3a1	'uc007huo.2,uc007hup.2'	4	1.41457	1.38455	2.07053	1.69964
Cinp	'uc007pcb.2,uc007pcc.2,uc007pcd.2,uc007pce.2'	6	1.52242	2.43769	3.28701	2.31838
Ppp2r1b	'uc009pkv.1,uc009pkw.1,uc009pkx.1'	2	1.5657	0.876042	2.56746	2.10342
Recql	'uc009epd.1,uc009epe.1,uc009epf.1'	6	1.13165	2.64392	2.97256	2.20082
Cox8a	'uc008gkj.1'	2	1.56851	1.42156	2.27494	1.52883
Ifit2	'uc008hgn.2'	2	1.25319	0.875043	1.33445	1.23108
Slc35b2	'uc008cqw.1,uc008cqx.1,uc008cqy.1'	2	1.27323	1.55918	2.24359	1.0605
Snrpa	'uc009fvg.1,uc009fvh.1,uc009fvi.1'	4	1.92467	1.91407	3.07662	2.18932
Fam195b	'uc007mtf.1,uc007mtg.1'	3	1.67205	2.21025	2.42121	2.32804
Slc43a3	'uc008kjn.1,uc008kjo.1'	5	1.79391	2.51306	4.17625	2.73783
Cetn3	'uc007rid.1'	4	1.66639	2.05555	2.49602	1.45532
Polr2l	'uc009klm.2'	2	1.24814	1.43493	2.24087	1.75178
Ass1	'uc008jdu.1,uc008jdv.1'	5	1.98036	2.69433	4.17046	2.37748
Pole2	'uc007nrv.1,uc007nrw.1,uc011yna.1'	6	1.43884	2.66626	3.07766	0.885885
Slc25a3	'uc007gtn.1,uc007gto.1'	4	1.69967	1.7351	2.52345	2.13699
Tecr	'uc009mkl.2,uc009mkm.2,uc009mkn.2,uc012ggr.1,uc012ggs.1'	2	1.0497	1.56996	1.87305	1.29692
Ndufb11	'uc009ste.2'	2	1.41915	1.56136	2.5465	2.511
Nup43	'uc007eic.2,uc007eid.2'	5	1.3394	2.66991	3.29246	2.0547
Prdx3	'uc008icd.1'	3	1.28764	1.60172	2.53908	2.3027
Arl6ip4	'uc008zoz.1'	3	2.10921	2.11202	2.54688	1.73709
Vdac2	'uc007sls.1'	5	1.66576	2.33402	2.70461	1.9836
Ssr2	'uc008pvs.1,uc008pvt.1'	2	1.04249	1.72412	2.34938	2.01101
Casp8ap2	'uc008sew.2,uc008sex.2,uc012dbh.1'	6	1.51863	2.99909	3.25632	1.86627
Rfwd3	'uc009nmb.1,uc009nmc.1'	5	1.45456	2.57518	4.15771	3.29424
Tm6sf1	'uc009ico.2,uc009icp.2,uc009icq.1,uc012fob.1'	2	1.20658	1.36513	2.16381	1.4922
Atp5g2	'uc007xwr.1'	2	1.40229	1.20395	1.93236	1.1724
Trap1	'uc007xzk.1'	4	1.50664	2.33731	2.57007	1.49619
Stt3a	'uc009oty.1'	3	1.29796	1.81583	2.09332	1.9098
Ppan	'uc009ojk.2,uc009ojl.2,uc012goy.1'	2	0.77338	1.90044	1.90705	0.736052
Rcc1	'uc008vbc.2,uc008vbd.2,uc008vbe.2'	5	1.16141	1.93993	4.18269	2.88215
Psmd14	'uc008jvc.1'	5	1.50553	2.84034	4.09679	3.45863
Slmo2	'uc008ofg.1'	6	2.07566	3.18829	3.38004	2.89249
Isyna1	'uc009mav.1,uc009maw.1'	4	1.58492	2.03975	2.26936	0.139479
Mrpl34	'uc009mdh.1'	3	1.58746	1.29128	2.47839	2.31263
Rad50	'uc007iws.1,uc007iwt.1,uc007iwu.1,uc011xur.1,uc011xus.1'	4	1.64257	1.95809	2.56627	1.72267
Nop16	'uc007qok.1'	4	1.12661	2.16913	2.30831	1.08427
Qdpr	'uc008xix.2'	5	1.80877	2.70747	3.38473	1.32444
Clpp	'uc008ddm.2'	3	0.987263	1.77151	2.11534	0.284416
Sf3a3	'uc008uqw.1,uc008uqx.1'	4	1.95955	2.27984	3.55983	2.55076
Alad	'uc008tez.1,uc008tfa.1'	6	1.43263	2.61266	3.45585	1.99452
Taf6	'uc009aew.1,uc009aex.1,uc009aey.1'	5	1.61505	1.67896	2.74173	2.32162
Mrpl17	'uc009izl.1,uc009izm.1'	5	1.12546	2.07742	2.947	0.675661
Dhfr	'uc007rkl.1'	6	1.84518	2.85459	3.57958	1.24109
Rnps1	'uc008avs.1,uc008avt.1,uc008avu.1'	3	1.19768	2.72461	2.77107	2.09962
Chchd3	'uc009bgo.1,uc009bgp.1'	4	1.39889	2.27217	3.08582	2.22909
Calu	'uc009bdg.1,uc009bdh.1'	2	1.26818	1.10938	2.51455	0.877052
Cdkn2aipnl	'uc007ius.2'	5	1.40773	2.47963	2.98794	2.58502
Fh1	'uc007dtn.2'	3	1.5979	2.35733	2.57851	2.21781
Gusb	'uc008ztt.1,uc008ztu.1,uc008ztv.1,uc008ztw.1,uc008ztx.1'	2	1.28883	2.17076	2.54096	2.0914
Oat	'uc009kcb.1'	5	1.9485	1.30564	3.54033	2.6112
Haus7	'uc009tlu.1,uc009tlv.1'	5	1.62614	2.42884	3.48142	2.00595
Cdc6	'uc007lhu.1,uc007lhv.1,uc007lhw.1'	6	2.11325	5.62122	6.32135	1.78309
Ece2	'uc007yqg.1,uc007yqh.1,uc007yqi.1,uc007yqj.1,uc007yql.1,uc007yqm.1,uc007yqn.1,uc007yqo.1,uc007yqp.1,uc012acx.1'	4	1.43801	1.86249	2.38291	0.667767
Polr1c	'uc008csc.1'	3	0.759981	1.14753	2.50496	2.311
Nup88	'uc007jwv.1,uc007jww.1,uc007jwx.1,uc007jwy.1,uc007jwz.1'	3	1.41173	1.3592	2.98028	2.42347
Fkbp3	'uc007nrb.1'	3	1.38167	2.01268	2.08759	1.45033
Sec61a1	'uc009cvi.1,uc009cvj.1'	3	1.51149	1.59323	2.12138	1.39398
Aldh9a1	'uc007dkx.1'	3	1.10923	1.3814	3.53159	1.11652
Pphln1	'uc007xix.1,uc007xiy.1,uc007xiz.1'	2	1.19748	0.936399	2.01695	1.3172
Psmd12	'uc007mar.1'	3	1.12169	1.84772	2.27916	1.88708
Dpy30	'uc008dnw.2,uc008dnx.2,uc008dny.2,uc012axc.1'	6	1.26218	3.41073	4.45622	2.95611
Rer1	'uc008wct.1,uc008wcu.1'	5	1.35895	1.97001	3.16613	1.9122
Tomm6	'uc008cvx.2,uc008cvy.1,uc012auw.1'	3	1.14832	1.51665	1.77574	1.52076
Rad23a	'uc009mnk.1,uc009mnl.1,uc009mnm.1,uc009mnn.1,uc009mno.1'	4	1.50976	1.50983	2.95929	1.41181
Farsa	'uc009mnr.2,uc009mns.2,uc009mnt.2,uc009mnu.2'	3	1.24391	1.88535	3.28722	2.20703
Fastkd3	'uc007rca.1,uc007rcb.1,uc007rcc.1'	4	1.11591	1.79577	1.96454	0.978504
Prpf31	'uc009evh.1,uc009evi.2,uc012ewf.1'	4	1.55589	2.86478	3.22855	2.09727
Prpf3	'uc008qlf.1,uc008qlg.1,uc008qlh.1'	5	1.719	1.73897	2.39841	1.79589
Ctsg	'uc007ubn.1'	3	1.16127	1.53302	2.47905	2.20783
Ptcd3	'uc009chp.1,uc009chq.1,uc009chr.1,uc009chs.1'	4	0.555084	1.70222	2.14041	1.576
Nudt2	'uc008sis.1'	2	0.796751	0.792221	1.02174	0.713483
Mrpl50	'uc008svu.1'	4	1.51801	1.95476	2.76511	1.63145
Trmt2a	'uc007ymz.2,uc007yna.2,uc007ynb.2,uc007ync.2,uc007ynd.1'	4	1.42225	1.82814	2.6273	0.49001
Snord22	'uc008gmj.2,uc008gmk.2,uc008gml.1,uc012bid.1'	4	1.58521	2.33629	3.52801	2.12108
Nap1l1	'uc007haa.2,uc007hab.2,uc007hac.2,uc007had.2,uc007hae.2'	6	1.44972	1.59387	2.68058	1.27672
	'uc008mqs.1,uc008mqt.1,uc008mqu.1'	6	1.60079	2.24573	3.7839	2.22791
	'uc008rey.1'	6	1.65344	2.61346	3.26189	2.25293
Smc6	'uc007nax.1,uc007nay.1,uc007naz.1'	6	1.81176	2.46398	3.11792	2.25829
Hmgn1	'uc008aco.1'	5	1.57697	1.71067	3.28286	1.97814
Adrm1	'uc008oin.1,uc008oio.1'	3	1.81835	1.64832	2.36653	1.22887
Dad1	'uc007tvm.2,uc007tvn.2'	2	1.25793	0.934919	1.66505	1.04508
Toe1	'uc008uhk.1'	3	1.17042	1.39246	1.89269	1.30344
Ncaph2	'uc007xgg.2,uc007xgh.2,uc007xgi.2,uc007xgj.1,uc007xgk.2'	5	1.50165	2.34436	3.82195	3.57652
Wdr18	'uc007gas.1,uc007gat.1'	4	1.2217	2.12007	3.32719	1.52352
Hspbp1	'uc009eyc.1,uc009eyd.1'	5	1.80224	2.03086	2.23912	0.493035
Ipo9	'uc007cte.1,uc007ctf.1,uc011wsj.1,uc011wsk.1'	6	1.97735	2.43113	3.43593	2.30459
Agpat5	'uc009kzv.1,uc012gaf.1'	5	1.14034	1.40117	1.72708	1.40818
Nup93	'uc009mvy.1,uc009mvz.1,uc009mwa.1,uc009mwb.1'	5	0.999923	2.25008	4.13181	3.43378
Prps1	'uc009uky.2'	2	1.43057	0.855717	1.78085	1.33891
Rexo2	'uc009pia.1,uc009pib.1'	5	0.974558	1.70219	2.4221	1.15682
Gtf2h5	'uc008aga.2,uc008agb.2'	5	1.29577	1.45266	3.15234	2.02185
Cyba	'uc009nsp.2,uc009nsq.2'	3	1.54437	1.80721	2.07961	0.957702
Ndufa3	'uc009eve.1'	5	1.47	2.10638	2.73901	2.33744
Alg8	'uc009ijc.2'	6	1.38958	2.40074	4.12886	2.7261
Acat2	'uc008alp.1,uc008alq.1'	4	1.60844	2.01555	3.14568	1.86128
Tbcb	'uc009gds.2'	2	0.698535	2.17142	2.67202	2.65791
Cox17	'uc007zet.1'	3	1.47754	1.59726	3.04643	2.45248
Bcat2	'uc009gwc.1,uc009gwd.1'	2	0.746916	0.98139	1.1477	1.00325
Parl	'uc007ypl.1,uc007ypm.1'	3	1.74145	1.88155	2.15532	1.3561
Eftud2	'uc007lsq.1,uc007lsr.2,uc007lss.1,uc011yfw.1'	5	1.35635	2.16006	2.68249	2.24632
Trpc2	'uc009iqi.1,uc009iqj.1,uc009iqk.1,uc009iql.1,uc009iqm.1,uc009iqn.1,uc009iqo.1,uc012fqr.1,uc012fqs.1'	5	1.55603	1.65836	1.66771	1.16288
Tmem107	'uc007jpc.2,uc007jpd.2'	6	1.68829	3.00258	4.20466	2.12503
Galk1	'uc007mjn.1'	5	0.866995	2.61862	2.61896	1.69693
Nup107	'uc007hdo.1,uc007hdp.1,uc007hdq.1,uc011xnq.1'	6	1.32059	3.0062	4.31256	4.10771
Tmem106c	'uc007xll.1,uc007xlm.1,uc007xln.1,uc011zyp.1'	5	1.63782	2.41445	2.71512	1.94746
Ppie	'uc008uow.1'	4	1.19491	1.97695	3.11936	2.43011
Polr3k	'uc008onw.1'	4	0.998974	2.28373	2.56403	1.73533
Shq1	'uc009dby.2,uc009dbz.2'	3	1.30187	1.91717	2.11151	0.983306
Ssr1	'uc007qdc.2,uc011yyk.1'	3	1.07057	1.15226	1.20337	0.910124
Mrpl20	'uc008weu.1'	4	1.44399	1.63947	3.26471	1.80866
Mrpl23	'uc009kny.1'	3	1.54195	1.9098	2.39811	1.89305
Nans	'uc008stu.1,uc008stv.1'	5	1.4066	2.01262	3.95241	1.87323
Ppp4c	'uc009jss.1'	5	2.10237	1.61011	3.24986	3.06164
Msh6	'uc008dvd.2'	3	1.57418	1.63743	1.97647	1.04097
Psmb8	'uc012apv.1'	2	0.909728	1.57909	1.67518	1.27143
Hmbs	'uc009pcz.2,uc009pda.2'	5	1.00252	2.22418	2.30996	1.96985
Actn4	'uc009gah.1'	5	1.2761	2.56087	2.90074	1.7409
Ramp2	'uc007loa.1,uc007lob.1,uc007loc.1,uc007lod.1'	3	1.42042	1.89303	2.66591	1.77563
	'uc009lti.2,uc009ltj.2'	6	1.63519	2.70515	3.6503	2.74924
Mrp63	'uc007udq.1'	5	1.19838	1.29542	1.96476	1.42059
Tpr	'uc007cyb.2,uc007cyc.1,uc007cyd.1,uc007cye.1,uc007cyf.1'	2	1.14974	1.45291	1.9969	1.33504
Tmx2	'uc008kix.1'	4	1.49572	1.49463	2.29627	1.76705
Ubl4	'uc009tos.2,uc009tot.2,uc012hkv.1,uc012hkw.1,uc012hkx.1,uc012hky.1'	5	0.852414	1.63675	3.12456	2.11663
	'uc009jkq.2,uc009jkr.2,uc012fsr.1,uc012fss.1'	4	1.12832	1.24049	1.24794	1.07949
Bud31	'uc009amf.1,uc009amg.1'	3	1.60839	2.16917	2.68739	2.281
Pitrm1	'uc007pjx.1,uc007pjy.1,uc011ywa.1'	2	0.927744	1.87755	1.87837	1.09385
Mrps33	'uc009bmh.1,uc009bmi.1'	2	1.24455	1.275	1.29361	1.17571
Med8	'uc008ujv.1,uc008ujw.1,uc008ujx.1'	3	1.04549	1.72973	2.13616	2.10108
Isy1	'uc009cub.1'	5	1.65835	2.18461	2.98037	1.37105
Snrnp40	'uc008uzf.1'	2	1.13781	2.06442	2.79742	1.72427
Mtch2	'uc008ktl.1,uc008ktm.1,uc008ktn.1,uc008kto.1,uc008ktp.1,uc012bzb.1'	5	1.22948	1.28094	3.06089	2.08262
	'uc009tdt.1,uc009tdu.1,uc009tdv.1'	4	1.48616	2.23387	2.86505	1.68652
	'uc008rhe.1,uc008rhf.2,uc008rhg.2,uc008rhh.2'	6	1.27846	1.89394	2.3206	1.80845
Tada1	'uc007dkl.2,uc007dkm.2'	3	1.15675	1.80846	2.57414	2.11127
Morf4l2	'uc009uiu.2,uc009uiv.1,uc009uiw.2,uc012hox.1,uc012hoy.1,uc012hoz.1,uc012hpa.1'	3	1.17505	1.96965	2.56837	2.19298
Sec23b	'uc008mrj.1,uc008mrk.1,uc008mrl.1,uc008mrm.1'	4	1.22465	1.94127	2.93381	1.70117
Minos1	'uc008vlu.2,uc012dno.1'	5	1.06706	1.30612	2.08821	1.75574
Acat1	'uc009pmg.1'	5	1.17464	2.06106	2.54715	2.23527
U2af1	'uc008bvo.2,uc012aov.1'	5	1.26789	2.34056	3.09457	2.03081
Ndufaf2	'uc007ruu.2,uc007ruv.2,uc011zek.1'	5	1.16233	2.03986	2.79608	1.02925
Nudcd2	'uc007ily.1'	3	1.05003	1.73123	3.00889	2.08896
Meaf6	'uc008urs.1,uc008urt.1,uc008uru.1,uc008urv.1'	4	1.54462	1.64002	3.12179	2.13956
Calm1	'uc007osq.1'	5	1.19171	1.41642	1.42962	1.03568
Tssc4	'uc009kov.1,uc009kow.1,uc009kox.2,uc012fxs.1'	6	1.91427	2.71838	3.0069	1.46701
Sip1	'uc007npx.2'	6	1.04163	2.20941	3.87187	1.84202
Exosc9	'uc008ozl.1,uc008ozm.1,uc008ozn.1'	3	0.888498	1.21296	2.74894	2.42615
Slc38a10	'uc007mrv.2,uc007mrw.2,uc007mrx.2,uc007mry.2,uc007mrz.2,uc007msa.2,uc011yiw.1'	2	0.927429	1.14963	1.34353	0.931709
Ankrd32	'uc007rgs.2,uc007rgu.2,uc007rgv.2'	5	1.56976	2.42927	2.47342	1.7671
Plp2	'uc009slx.1'	3	1.69761	2.48089	3.04417	1.73422
Nup188	'uc008jbz.1,uc008jca.1,uc008jcb.1'	5	1.56869	1.16364	1.94026	0.960063
Agk	'uc009bml.2,uc009bmm.2,uc009bmn.2'	4	1.21658	1.53549	2.68107	1.70476
Ado	'uc007flz.2'	3	0.968114	2.09969	2.5856	1.54326
Cul1	'uc009bsz.1,uc009bta.1'	4	1.46486	1.62561	1.66484	0.992195
Fbl	'uc009fxy.1'	2	1.28751	2.03914	2.39384	0.494124
Trp53	'uc007jql.2,uc007jqm.2,uc007jqn.2,uc011xww.1,uc011xwx.1'	3	1.40554	1.72298	2.47976	1.62475
Bre	'uc008wyx.1,uc008wyy.1,uc008wyz.1,uc008wza.1,uc008wzb.1,uc008wzc.1,uc008wzd.1,uc008wze.1,uc008wzf.1,uc008wzg.1'	3	0.888738	2.18926	2.70486	1.98911
	'uc009kbr.1'	4	0.958715	1.71549	2.77722	0.654324
Impa2	'uc008fly.1'	5	1.19709	2.25354	3.11997	1.11224
Tubg2	'uc007lnk.1,uc007lnl.1,uc007lnm.2,uc007lnn.1'	6	1.48981	3.6658	4.95199	3.06025
Srsf3	'uc008bsd.2,uc008bse.2'	3	1.07166	1.41837	1.46453	1.2294
Rheb	'uc008wsj.1'	3	1.3955	1.53848	2.70798	2.04005
Ncapd3	'uc009oqh.2,uc009oqi.1'	6	1.34758	2.49403	3.97604	3.88899
Dnajc11	'uc008vys.2,uc008vyt.2'	3	1.06184	1.42442	2.11424	1.55325
Chchd2	'uc008ztn.1'	3	1.16585	1.38526	1.83179	1.25258
Mrps36	'uc007rrl.2,uc007rrm.2'	5	1.2817	2.09081	3.20953	2.06217
Krtcap2	'uc008pyl.1'	3	1.17272	2.04308	2.57177	1.07438
Cd320	'uc008bzv.1'	2	1.12355	1.36453	1.75729	0.441915
Med22	'uc008iwd.1,uc008iwe.1'	2	0.769569	0.979631	1.45474	0.614479
Ndufb9	'uc007vtw.1'	3	1.39089	2.0507	2.86045	2.37259
Pwp1	'uc007gnc.2,uc007gnd.2'	4	1.49005	1.91227	2.30697	1.72322
Litaf	'uc007yen.2'	3	1.12333	1.87104	3.00458	1.53472
	'uc008muc.2'	2	0.893211	1.63728	3.57757	1.72781
Haus1	'uc008frs.1,uc008frt.1'	6	1.34141	2.63464	3.20268	2.55247
	'uc008pnu.2'	5	1.41703	1.85101	4.36629	3.44059
Sae1	'uc009fhp.1,uc009fhq.1,uc009fhr.1'	6	1.64008	3.22321	3.98567	3.73707
Higd1a	'uc009seb.2,uc009sec.2'	5	1.18363	2.3469	2.5399	0.899873
Wdr77	'uc008qvo.1,uc008qvp.1'	4	1.10401	1.85415	2.20809	1.07322
Eif3i	'uc008uxm.2,uc008uxn.2'	2	1.08873	2.03787	2.16607	1.23485
Yif1b	'uc009gbh.2,uc009gbi.2'	4	1.39712	1.54167	3.22808	1.88367
Slfn9	'uc007kob.1,uc007koc.1'	5	1.33744	1.38898	1.73647	0.907954
Hmgxb4	'uc009mgw.1,uc009mgx.1,uc009mgy.1,uc009mgz.1'	5	1.41654	1.64684	2.65214	1.58975
Ubr7	'uc007ouo.1,uc007oup.1'	5	1.2966	2.05378	3.37141	1.91746
Cenpm	'uc007wym.1,uc007wyn.1,uc007wyo.1'	6	1.20457	3.71903	6.3865	5.09134
Lsm7	'uc007gez.1,uc007gfa.1'	2	1.23797	1.56845	2.19865	1.51478
Apoo	'uc009ttl.2,uc009ttm.2,uc012hmd.1,uc012hme.1'	6	1.00337	1.53546	2.91868	1.78686
Mrps2	'uc008iyg.1,uc008iyh.1,uc008iyi.1,uc008iyj.1,uc008iyk.1,uc012bsy.1'	2	1.47844	1.49927	1.51503	1.27139
Prdx4	'uc009uru.1,uc009urv.1'	6	1.53204	2.09141	2.77196	2.13217
Las1l	'uc009tud.1,uc012hmj.1'	4	1.07363	1.97513	2.14157	1.52433
Dhrs4	'uc007tyl.2,uc007tym.2,uc007tyn.1'	5	1.3789	2.06812	3.98182	1.91256
Slc35a4	'uc008eob.1,uc008eoc.1,uc008eod.1'	2	1.77487	1.64536	2.71203	1.84054
Moap1	'uc011yqq.1,uc011yqr.1'	3	0.959119	1.30734	2.35423	1.75705
Ndufa8	'uc008jlb.1'	3	1.20556	1.81674	2.35846	1.85084
Rad18	'uc009dec.2,uc009ded.2,uc009dee.1,uc009def.1,uc009deg.2,uc012epz.1'	6	1.35808	3.58025	4.66937	4.10217
Zfp367	'uc007qyj.1,uc007qyk.1'	5	1.07227	1.97051	2.20486	0.705906
Ddx46	'uc011yzx.1'	2	1.2551	1.11546	1.40057	1.12457
Scamp2	'uc009pve.2'	2	0.925984	1.20436	2.05407	1.44045
Ftsj3	'uc007lym.1'	3	0.635247	2.30994	3.2828	1.48806
Trappc1	'uc007jpq.2,uc007jpr.1'	4	1.14459	1.03063	2.34148	1.86471
	'uc007iuh.1'	3	1.04525	1.21323	2.72426	1.40367
Dlst	'uc007ogi.1,uc007ogj.2,uc007ogk.2,uc007ogl.1'	2	1.04401	1.25825	2.57294	1.77826
Eif3j1	'uc008mab.1'	2	1.21901	1.21309	1.54923	1.40221
Mrpl15	'uc007afd.2,uc007afe.2,uc007aff.2'	3	0.873664	1.7615	2.08853	1.40384
Bcl2	'uc007cgw.1,uc011wqb.1'	3	0.802155	1.94433	2.21235	1.60363
Atad5	'uc007klf.2,uc007klg.2,uc007klh.1,uc011yar.1'	6	1.28124	2.40431	2.94041	1.61353
Pcmt1	'uc007ehx.2,uc007ehy.2,uc007ehz.2,uc007eia.2,uc011wzx.1'	5	0.930118	1.76248	2.37031	2.2302
Mthfd1l	'uc007ehj.2,uc007ehk.2,uc011wzu.1'	3	1.18917	1.67469	2.05463	1.26973
Cpsf2	'uc007otx.2'	3	0.934678	1.72789	1.86353	1.57596
Cnpy4	'uc009aez.1'	2	0.915351	1.22315	1.55648	0.301788
Baz1b	'uc008zxy.1,uc008zxz.2,uc012eeo.1'	5	0.854207	2.03249	2.14087	1.5952
Pno1	'uc007icc.1'	4	0.996061	1.85927	2.73576	1.27157
Rrp12	'uc008hmk.1'	4	0.956496	1.61082	1.65312	0.672928
Timm10	'uc008kjh.2'	2	0.987481	1.12282	2.71476	1.16445
Mfge8	'uc009hxz.1,uc009hya.1,uc009hyb.1'	2	1.21916	1.41506	1.43704	1.17226
Erlin1	'uc008hpd.2,uc008hpe.2,uc012bme.1'	2	1.42035	1.369	2.00982	0.848581
Elp5	'uc007jtc.2,uc007jte.2,uc011xxm.1'	4	0.567587	1.79747	2.04641	1.52455
Heatr1	'uc007plk.1,uc007pll.1,uc011ywe.1'	3	1.0812	1.5407	1.98345	0.940654
Ndufb3	'uc007bck.1'	3	1.10264	1.18932	3.09663	2.39365
Tubb5	'uc008ciq.2'	6	1.08682	2.06261	2.82213	2.35651
Rif1	'uc008jqq.1,uc008jqr.1,uc008jqs.1,uc008jqt.1,uc012bvj.1,uc012bvk.1'	4	1.28906	1.89001	2.29699	1.36391
Ndufb6	'uc008shk.1'	5	0.903225	1.70032	2.59419	2.45953
Dna2	'uc007fji.2,uc007fjj.2,uc007fjk.1,uc011xfh.1,uc011xfi.1'	6	1.19691	2.56164	3.75365	1.49384
Polr2d	'uc008eim.1'	4	1.05195	2.03749	2.41409	1.38305
Mbd4	'uc009dje.2,uc009djf.2,uc012eqs.1'	2	1.129	1.08189	2.0331	1.06301
Parp2	'uc007tlq.1,uc007tlr.1,uc011zjx.1'	4	1.15616	1.85063	2.52654	1.90593
Coq7	'uc009jjy.1,uc009jjz.1'	6	1.25995	1.49929	2.67216	2.2146
Serf1	'uc007rqe.2,uc007rqf.2'	3	0.978397	1.60619	2.27863	0.891131
Gtf2h2	'uc007rqt.1,uc007rqu.2,uc007rqv.2,uc007rqw.1,uc007rqx.2'	2	1.00391	0.97427	1.64593	1.5119
Eif3h	'uc007vrb.1'	2	1.09858	1.32277	1.49713	1.40724
Gm20708	'uc007mnw.2,uc007mnx.2,uc007mny.2'	3	1.08341	2.03689	2.38149	1.06056
Anp32b	'uc008stt.1,uc012dds.1'	2	0.960695	2.02245	2.19298	2.01421
Dnajc15	'uc007usc.1'	3	1.10288	1.67722	2.98872	2.46424
Ppih	'uc008ulw.2,uc008ulx.2,uc008uly.2,uc008ulz.2'	5	1.36461	2.15555	3.42987	3.32913
Memo1	'uc008dnu.2,uc012axb.1'	4	1.02897	1.98133	2.58938	1.33404
Ica1	'uc009axx.1,uc009axy.1,uc009axz.1'	4	0.24429	1.38022	1.79352	-0.415262
Ppp2r1a	'uc008aqi.1'	2	1.2117	1.67371	1.82675	1.5778
Fxn	'uc008hao.1,uc012bjr.1'	5	1.24626	1.61959	2.16743	1.25939
Tsfm	'uc007hhm.1,uc007hhn.1,uc007hho.1'	5	0.972509	2.05597	2.69452	2.15603
Ndufa7	'uc008bzu.1'	3	1.09048	1.92049	2.39179	2.23531
Sigmar1	'uc008sjk.1,uc008sjl.1,uc012dcg.1'	2	0.866416	1.05204	2.3317	1.2145
Ccne2	'uc008rzd.1,uc008rze.1,uc008rzf.1'	6	0.939602	2.96905	5.8747	1.35396
Cenpk	'uc007rtb.1,uc007rtc.1,uc007rtd.1,uc007rte.1,uc007rtf.1'	6	1.2968	3.10423	5.06181	4.03751
Ddx56	'uc007hyc.1,uc007hyd.1'	4	0.856928	2.10052	3.16295	1.55415
Ripk3	'uc007uav.2,uc007uaw.2,uc011zlp.1'	2	0.873778	2.07883	3.34182	1.90287
Mrpl55	'uc007jdi.1,uc007jdj.1,uc007jdk.1'	3	1.04708	1.59214	1.79588	1.36357
Vdac1	'uc007ivm.1'	5	1.01992	1.76403	3.03967	1.76459
Eprs	'uc007dze.1,uc007dzf.1,uc007dzg.1,uc007dzh.1'	3	0.915945	1.84611	2.39905	1.14582
Cyb5r3	'uc007xac.1,uc007xad.1'	3	1.51657	1.31549	2.56723	1.51946
2014-09-11	'uc008ydx.1,uc008ydy.1,uc008ydz.1,uc008yea.1,uc008yeb.1,uc008yec.1'	5	0.945926	1.97075	2.8754	1.63194
Mrpl16	'uc008gsx.1'	2	1.04473	1.88649	1.95199	1.4455
Rab31	'uc008dgg.2,uc008dgh.2,uc008dgi.2'	2	1.21539	1.44282	2.44504	1.87292
	'uc008agz.2,uc008aha.2'	5	1.08711	1.91853	3.42785	2.71767
Dynlt1-ps1	'uc008ahn.2,uc008aho.2'	5	1.08711	1.91853	3.42785	2.71767
Prps2	'uc009uxd.1'	5	0.867478	2.51814	2.62617	2.43286
Gltp	'uc008yzw.1'	4	1.22675	2.06792	2.96477	0.543511
Prpf38b	'uc008qzx.1,uc008qzy.1'	2	1.1009	1.53702	1.59525	0.678865
Zdhhc6	'uc008hxq.1,uc008hxr.1,uc008hxs.1,uc008hxt.1,uc008hxu.1,uc012bnn.1'	4	0.98753	2.3442	2.85776	2.17163
Sdhc	'uc007dnb.2'	4	1.05256	1.68106	2.22474	1.66176
Jagn1	'uc009dgd.1,uc009dge.1,uc009dgf.1'	4	1.04566	2.072	2.61102	1.97794
Arhgdia	'uc007mtj.1,uc007mtk.2'	3	1.10535	1.68505	1.98665	1.22771
Nubp2	'uc008ayo.2'	4	1.39732	2.21344	2.34171	2.27613
D10Wsu52e	'uc007gni.1'	3	0.901286	1.20817	1.32831	0.693272
Fam165b	'uc007zyx.1'	5	1.07178	1.2377	2.90808	2.46707
Skp2	'uc007vff.1,uc007vfg.1,uc007vfh.1,uc007vfi.1'	5	1.19177	1.75542	2.07883	1.91216
Tm9sf1	'uc007tzs.1,uc007tzt.1,uc007tzu.1,uc007tzv.1,uc007tzw.1'	5	0.935598	1.68771	2.66728	1.70153
Snrnp25	'uc007ija.2'	4	1.36288	2.13867	4.15236	3.63507
Chrac1	'uc007wbq.1,uc007wbr.1'	2	1.35918	0.734819	1.93898	0.680817
Aco2	'uc007wxp.1'	3	0.873199	1.69643	2.59391	1.92287
Ssrp1	'uc008kjt.1,uc008kju.1,uc008kjv.1'	6	1.01803	1.93492	2.67111	2.11925
Zcchc17	'uc008uze.1'	3	1.02893	0.64165	2.15826	1.82617
Tbrg4	'uc007hyz.2,uc007hza.2'	4	1.15425	1.46979	1.58398	0.78922
Ppib	'uc009qei.1'	2	1.13855	1.17488	1.7413	1.61837
Tmem98	'uc007kmj.1'	4	1.14144	1.74164	2.41245	0.525868
Psme3	'uc007lom.1,uc007lon.1'	3	1.20895	1.42438	1.92484	1.06097
Ecd	'uc011zgo.1'	3	1.08406	1.46399	2.09034	1.64821
Ndufa10	'uc007cbh.1'	3	0.675029	1.73935	2.79134	1.87514
Pole4	'uc009clj.1,uc009clk.1'	4	1.2632	1.93314	2.51867	1.16612
Xpo5	'uc008crz.1,uc008csa.1,uc008csb.1,uc012aun.1'	3	0.67581	1.90527	2.0308	1.25039
Hnrnpa1	'uc007xxp.1,uc007xxr.1,uc007xxs.1,uc007xxt.1,uc012aah.1,uc012aai.1'	4	1.01487	1.26627	1.61688	1.53644
Cnpy3	'uc008cuf.2,uc008cug.2'	2	0.943991	1.57196	2.30067	0.660619
Tmem208	'uc009ncs.2'	3	1.4975	1.43944	2.46164	2.09372
Wdr76	'uc008lzi.1,uc008lzj.1,uc012ccs.1,uc012cct.1'	6	1.09574	2.10206	2.22041	1.54244
Orc3	'uc008sgb.2,uc008sgd.1,uc008sge.1,uc012dbn.1'	2	0.916565	1.22913	1.90627	1.45328
Blvra	'uc008mep.1,uc008meq.1,uc008mer.1'	5	1.1296	2.75055	3.06796	2.50552
Gins4	'uc009ler.2'	5	0.975982	1.8766	3.15771	2.17277
Naa50	'uc007zgy.1,uc007zgz.1,uc007zha.1,uc012afx.1'	5	1.0881	2.33443	2.72652	1.73826
Rngtt	'uc008sfv.1,uc012dbk.1,uc012dbl.1'	2	1.02329	1.22318	1.74305	1.69264
Irf8	'uc009nrj.1,uc009nrk.1'	2	0.795491	1.12272	1.63428	1.22388
Ebp	'uc009soi.1'	5	1.08582	1.59698	3.78323	2.67412
Tk1	'uc007mnz.2'	6	1.09284	4.93935	8.94289	5.16815
Mospd3	'uc009acz.1,uc009ada.1'	3	1.0935	1.18596	1.84455	1.67034
Cox7a2	'uc009quv.1'	6	1.06636	2.12575	3.34359	2.9528
Ube2k	'uc008xnu.1,uc008xnv.1,uc012dwq.1'	3	0.951402	1.54733	2.24983	1.0643
BC055324	'uc007dhs.1,uc007dhu.1'	5	1.00504	1.69376	4.36183	2.40626
Akip1	'uc009jdy.1'	4	1.01815	2.50429	3.31929	2.09471
Tyms	'uc008wux.2,uc008wuy.2,uc012dtx.1,uc012dty.1'	6	1.09592	2.63168	4.58716	2.64771
Pcbp1	'uc009csc.1'	3	0.967936	1.78916	2.30891	0.644257
Eif5a	'uc007jsq.2,uc007jsr.2,uc007jss.2,uc007jst.2,uc007jsu.2,uc007jsv.2,uc011xxi.1,uc011xxj.1,uc011xxk.1'	3	0.946429	1.09161	1.3099	0.610182
Hnrnpa3	'uc008kel.2,uc008kem.2,uc008ken.2,uc008keo.2,uc008kep.2'	3	0.974763	1.34181	1.71807	1.65323
Kpna1	'uc007zca.1,uc007zcb.1'	4	0.85818	1.51033	1.74801	1.07445
Snrpc	'uc008bps.1'	5	0.797185	1.63218	1.98073	1.75139
Cdc45	'uc007yol.2,uc007yom.2'	6	0.966473	2.39475	5.29151	3.58888
Prdx1	'uc008uhd.1'	4	1.04317	1.24996	1.53821	1.08535
Thrap3	'uc008usv.1,uc008usw.1,uc008usx.1'	2	0.947179	1.21977	1.63267	1.08118
Nr0b2	'uc008vcz.1'	3	0.492461	1.04235	1.04983	0.256663
Slc25a39	'uc007lrt.2,uc007lru.1'	4	0.863562	2.19097	3.10113	1.43695
Ubxn1	'uc008gno.1,uc008gnp.1,uc008gnq.1'	2	1.21237	1.64066	2.23306	1.53294
Clspn	'uc008utl.2,uc008utm.2,uc008utn.2,uc008uto.1'	6	0.968706	3.14343	4.59864	2.90046
Mcts1	'uc009tad.1,uc009tae.1,uc009taf.1'	2	0.736423	2.07807	2.26468	2.14861
Pabpn1	'uc007txg.2,uc007txh.2,uc007txi.2'	3	0.705393	1.16239	1.20897	0.549124
	'uc008mgc.2'	2	0.568928	0.92604	0.940116	0.0124983
Gm11974	'uc007hyu.1'	3	0.942914	1.62295	2.24299	0.929668
Pdcd6	'uc007rey.2,uc007rez.2'	2	1.21627	1.29442	2.16117	1.32705
Ergic2	'uc009etd.1,uc009ete.1,uc009etf.1,uc009etg.1'	5	1.06927	1.36728	2.22077	1.93595
Nudt14	'uc007pfm.1'	2	1.47091	1.2619	2.44717	1.00894
Sqle	'uc007vxq.1,uc007vxr.1'	4	0.628242	1.57962	1.89511	0.137524
Cmpk1	'uc008ueg.2'	2	0.75248	1.76966	2.74024	1.57264
Glod4	'uc007kfi.2,uc007kfj.2'	2	1.07663	1.41891	2.21991	0.969783
BC004004	'uc008bsn.2'	4	1.07937	2.00671	2.56379	1.82872
Cisd2	'uc008rlk.2,uc008rll.1'	5	0.98938	1.61011	2.46655	0.810651
Selplg	'uc008yyr.2,uc008yys.2,uc008yyt.2'	3	1.41091	1.24502	2.43398	2.36797
Cdca4	'uc007pfi.1,uc007pfj.1'	6	0.94017	1.49976	3.6533	3.57324
Lamtor1	'uc009ipw.2'	2	0.912424	1.51823	1.8193	1.66456
Tctn3	'uc008hla.1,uc008hlb.1,uc008hlc.1'	2	0.71671	1.01792	1.06684	0.580139
Eny2	'uc007vpu.1,uc007vpv.1,uc007vpw.1'	3	0.996358	1.39348	2.14324	1.68023
Cdt1	'uc009ntd.1,uc009nte.1'	6	0.958192	1.74283	2.2649	0.827804
Tex261	'uc009cof.2,uc009cog.2'	2	0.813735	1.1817	2.33272	1.68941
Rrm2	'uc007ner.2'	6	0.706611	3.99589	9.4004	4.33704
Scamp3	'uc008pxt.2,uc008pxu.2,uc008pxv.1,uc008pxw.1,uc008pxx.1,uc012cse.1,uc012csf.1,uc012csg.1,uc012csh.1'	4	1.34328	1.62881	2.57394	1.19071
Glod4	'uc007kfc.2,uc007kfl.2'	3	1.34037	1.59726	1.90013	1.83041
Dscc1	'uc007vrw.1,uc011zsy.1'	6	0.955157	2.59945	3.74864	1.51667
Coro1c	'uc008yyu.1,uc008yyw.1,uc012ebq.1'	3	1.38173	1.73372	2.45843	2.10227
VKORC1	'uc009jxe.1'	2	0.758583	1.87851	2.1216	0.93965
Psmb6	'uc007jve.2'	2	0.833635	1.22336	1.85572	1.53466
	'uc009deo.2,uc012eqa.1'	3	1.06814	0.569037	1.07363	1.04198
Tbl3	'uc008axv.1,uc012amp.1'	4	0.804788	2.09683	2.98857	1.611
Smarcc1	'uc009rtm.1,uc009rtn.1,uc009rto.1,uc009rtp.1,uc012hbg.1'	3	0.8289	1.74029	2.68303	1.59096
Spata5	'uc008pau.2,uc008pav.2,uc012coy.1'	4	1.29611	0.602546	2.26712	0.51683
Smarcb1	'uc007ftm.2,uc007ftn.2,uc011xgt.1'	4	1.13615	2.24049	3.13493	2.33045
Exosc10	'uc008vut.2,uc008vuu.2,uc008vuv.2,uc012dpp.1'	2	0.852521	1.15531	2.0424	1.81076
Cenph	'uc007rrn.1'	6	0.87157	2.57046	4.7	2.83328
Asns	'uc009axf.1'	4	1.18132	0.87664	1.94553	0.577039
Gtf2e2	'uc009lkh.2,uc009lki.2,uc012gcg.1'	3	0.99422	1.37666	1.71638	1.451
Ift27	'uc007wor.1,uc007wos.1'	3	0.658438	2.12437	2.52776	1.82773
Nxf1	'uc008gmr.1'	2	1.15416	1.43614	2.11612	1.81304
Ccdc137	'uc007msu.1'	2	0.156342	0.781044	1.02798	0.207041
Rad51	'uc008ltc.1,uc008ltd.1,uc012cbp.1'	6	0.673872	3.24009	5.87977	3.43295
Psmd5	'uc008jje.1,uc012bui.1'	4	1.06919	1.73699	3.01177	1.45241
Smarce1	'uc007lii.1,uc007lij.1,uc011yej.1,uc011yek.1,uc011yel.1,uc011yem.1,uc011yen.1'	4	0.899561	1.63692	1.97344	1.83862
Mrpl19	'uc009clf.1'	3	0.664316	1.08311	1.17621	0.442307
Poldip2	'uc007kjo.1,uc007kjp.1'	3	0.936807	1.139	1.87631	0.664288
Dnajc8	'uc012dmi.1'	3	1.04471	1.63532	2.29892	2.20337
Smarca5	'uc009mja.1,uc012ggn.1'	4	1.09436	1.33756	1.89919	1.80106
Pfas	'uc007jos.2,uc007jot.2,uc007jov.2,uc011xws.1'	6	0.838877	1.90749	2.11972	0.742399
Psmg4	'uc007qbe.2,uc007qbf.2'	3	0.69335	2.04892	2.55448	1.34806
Dtnbp1	'uc007qgw.1,uc007qgx.1'	3	1.35347	1.50292	2.25109	2.03142
Ncbp2	'uc007yxz.2'	2	1.26949	0.937507	2.44766	1.19852
Cbx3	'uc009bxr.1'	6	0.948291	1.29784	1.51669	1.23319
Ergic1	'uc008bef.1,uc008beg.1'	2	1.04235	1.15811	1.33498	1.16285
Smc5	'uc008haa.1,uc008hab.1'	3	0.896917	1.04729	1.52819	1.22621
Psph	'uc008zth.2'	2	1.21228	0.907315	2.32576	1.66011
Arl6ip6	'uc008jrn.2,uc008jro.2'	4	1.14154	1.36814	1.72898	0.80877
Trappc6a	'uc009fmb.1,uc009fmc.1,uc009fmd.1'	2	1.00432	1.1352	1.56263	0.677998
Tmem126a	'uc009ihn.1,uc009iho.1'	2	0.557822	1.51757	2.23962	1.50546
Usp1	'uc008tum.1,uc008tun.1'	4	1.04703	1.50034	2.39458	1.40926
Nsun5	'uc008zyh.1'	2	0.663498	1.60072	1.61999	0.563039
Emc8	'uc009nrf.1,uc009nrg.1'	6	0.769408	1.43115	1.97192	1.41006
Fam96b	'uc009nba.1'	2	1.16719	1.23205	1.9875	1.63088
Ptp4a1	'uc007anh.1,uc007ani.1'	3	0.963219	1.1508	2.05279	1.49987
Tmem48	'uc008tzt.1'	6	0.793821	2.2816	3.3656	3.10217
Smpd4	'uc007yll.2,uc007ylm.2,uc007yln.2,uc007ylo.2,uc007ylp.2,uc007ylq.1'	4	0.982295	1.15189	2.3034	1.74362
Ccdc22	'uc009sln.1'	2	0.925427	1.56236	2.25483	1.20451
Hsp90b1	'uc007gqi.1'	3	0.669219	1.67107	2.69062	2.51651
Rpain	'uc007jxa.1,uc007jxb.1,uc007jxc.1,uc007jxd.1,uc007jxe.1,uc011xyc.1'	3	1.10542	1.83777	2.48881	0.729027
Ube2n	'uc007gwm.1,uc007gwn.1'	3	0.986843	1.73737	1.76302	1.66333
Tceb1	'uc007ajv.1,uc007ajw.1'	2	0.845074	1.4724	2.37426	1.53289
Bend4	'uc012dws.1'	5	0.652141	1.37202	1.46872	-0.0203862
Riok2	'uc008apd.2,uc008ape.2,uc008apf.1'	2	1.11561	1.25436	1.53976	1.15635
Mrpl11	'uc008gbt.2'	2	0.979792	1.23186	2.03889	1.193
Gimap9	'uc009bvh.1'	3	1.03982	0.96859	1.84617	0.545488
Tsr1	'uc007kcm.1,uc007kcn.1,uc007kco.1,uc007kcp.1'	2	0.669456	2.17336	2.24986	0.753141
Ict1	'uc007mhj.1,uc007mhk.1,uc007mhl.1'	3	0.919885	1.21735	2.37531	1.91514
Ddrgk1	'uc008mjs.1'	2	0.922754	1.15151	1.45311	1.19525
Fam136a	'uc009crl.1'	4	0.451753	2.24973	3.10733	1.51945
Mcm10	'uc008ifg.2,uc008ifh.2,uc008ifi.2,uc008ifj.1,uc008ifk.2'	6	0.623302	3.42646	5.33861	3.3679
Asf1b	'uc009mlk.1'	6	0.818844	2.66056	7.07083	5.58208
Arpp19	'uc009qrn.2,uc009qro.1,uc009qrp.1,uc012gwx.1'	3	0.900847	1.53677	2.13239	1.60792
Acpl2	'uc009rcu.1,uc009rcv.1,uc009rcw.1,uc012gyr.1'	3	1.03039	1.16011	2.34367	1.10139
Pole	'uc008yqk.2,uc008yql.2,uc008yqm.2,uc008yqn.2,uc008yqo.2,uc008yqp.2'	6	0.619072	2.84767	3.70413	1.96775
Mlkl	'uc009nmd.1,uc009nme.1'	3	0.922117	1.65022	2.68683	1.49932
Mars	'uc007hiz.2,uc011xpp.1'	4	1.08803	1.701	2.27764	2.23764
Ube2g2	'uc007fwa.1,uc011xhg.1'	3	0.99327	1.68082	2.03667	1.96957
Fbxo7	'uc007gnk.1,uc007gnl.1,uc007gnm.1'	2	0.281775	1.85647	2.20351	1.8201
Nanp	'uc008muv.2'	3	1.07842	1.76172	2.14836	0.972641
Nop14	'uc008xcx.1'	2	0.969494	1.24531	2.14159	0.857668
Mrpl44	'uc007bqx.1,uc007bqy.1'	3	0.635055	1.98892	2.98342	1.64251
Thoc7	'uc007sge.1,uc007sgf.1,uc007sgg.1,uc007sgh.1'	4	0.827729	1.50947	1.57052	1.4409
Ncapg2	'uc007pht.1,uc007phu.1'	6	0.647603	2.86486	4.29425	3.34207
Ubap2l	'uc008qal.2,uc008qam.2,uc008qan.2,uc008qao.2,uc008qap.2,uc008qaq.2,uc008qar.1,uc008qas.2,uc008qat.2,uc008qau.2,uc008qav.2,uc008qaw.1,uc008qax.1,uc008qay.1,uc008qaz.2'	2	0.912965	1.15614	1.31309	0.843282
Eif2b3	'uc008uhu.2,uc008uhv.2,uc008uhw.2,uc012djo.1'	2	0.871894	1.34023	1.88795	0.62795
Mpc2	'uc007djc.1,uc007djd.1'	2	0.927282	1.4827	2.1486	0.779584
Polr2g	'uc008gna.1'	2	0.94707	1.82465	2.47146	1.67987
Abhd14a	'uc009rjq.2,uc009rjr.2,uc012gzu.1'	2	0.568338	2.05918	2.07079	0.782977
Lsm2	'uc008cer.2,uc008ces.2,uc008cet.2,uc008ceu.1'	6	0.752979	2.41397	4.07831	2.76138
Atp5d	'uc007gby.2,uc007gbz.2'	2	0.62546	1.84356	2.09935	1.7122
Zcwpw1	'uc009adz.2'	5	1.10176	0.907542	1.83357	1.16246
Zfp808	'uc007qws.1'	5	1.15778	1.2901	1.78714	1.25128
Cyb5r1	'uc007cru.1,uc007crv.1,uc007crw.1'	5	0.67956	1.94463	2.14282	0.900133
Dbr1	'uc009rei.1'	5	0.952325	1.16232	2.04573	1.47997
Snrnp70	'uc009guw.1,uc009gux.1,uc009guy.1'	4	0.811287	1.39089	1.90144	1.47733
Gnpnat1	'uc007tgp.1'	4	1.07852	1.74526	1.93127	0.739117
Vps29	'uc008zlb.1,uc008zlc.1'	2	0.410421	1.74897	2.22724	1.98179
	'uc009agk.1,uc009agl.1'	4	0.718657	2.08267	2.17624	1.19093
Rbbp8	'uc008ebl.1,uc008ebm.1,uc008ebn.1,uc008ebo.1,uc008ebp.1,uc012azh.1'	5	0.788004	2.17786	3.34951	2.26745
Ppig	'uc008jyk.1,uc008jyl.1,uc008jym.1,uc008jyn.1'	2	0.858124	1.54246	2.35506	1.41625
Pmpca	'uc008ivd.1,uc008ive.1'	4	0.889945	1.27914	2.27591	1.75775
Pigyl	'uc009ooc.1'	3	0.568341	1.26503	1.51063	0.0660769
Rcc2	'uc008vna.2'	4	0.773353	1.57019	1.67068	1.37539
Gstp1	'uc008fyf.1'	2	0.682079	1.41053	1.50285	0.407184
Sf3b4	'uc008qme.1'	4	0.761137	1.7459	2.00786	0.878461
Eif3m	'uc008lkl.1'	2	0.765132	1.3032	1.6606	1.5694
Eif2s2	'uc008njw.1,uc008njx.1'	3	0.838728	1.48219	1.80909	1.21042
Prelid1	'uc007qql.1,uc007qqm.1'	2	1.10477	1.20445	2.62731	2.25066
Dpysl2	'uc007uko.1'	4	1.01985	1.34969	2.18786	0.784957
Psip1	'uc008tkw.1,uc008tkx.1,uc008tla.1'	6	1.15126	1.2932	2.31823	2.17584
Ndufa11	'uc008dcz.2,uc008dda.2,uc008ddb.2'	3	1.00509	1.25033	2.21409	1.78968
Fam50a	'uc009ton.2,uc012hkt.1'	3	1.09407	0.996562	1.58068	0.995457
Exo1	'uc007dtu.2'	6	0.477729	2.57907	3.62428	1.84344
Mthfd2	'uc009cne.2'	6	0.322314	2.24443	4.28101	2.10554
Tsnax	'uc009nxz.1,uc009nya.1'	2	-0.0184025	1.05953	1.09296	0.309788
	'uc009oal.1,uc009oam.1'	2	-0.0212735	1.05559	1.09023	0.306259
Chchd6	'uc009cwh.2,uc009cwi.2,uc012eot.1'	4	0.726782	1.57724	2.58705	1.27106
Ide	'uc008hil.1,uc008him.1'	3	1.0693	1.73182	2.44722	1.02751
Ptges3	'uc007hld.1'	6	0.743026	1.42969	1.82012	0.918433
Slc10a3	'uc009tou.1,uc009tov.1'	4	0.71163	1.50184	2.3881	0.498471
Arf1	'uc007jdm.2,uc007jdn.2,uc007jdo.2'	2	1.02891	1.07592	1.46041	1.0812
Kdelr2	'uc009akh.2'	5	0.545088	1.62194	2.04887	0.732069
Atp1b3	'uc009rck.1'	4	0.974199	1.52114	1.68901	0.867735
Tardbp	'uc008vva.1,uc008vvb.2,uc008vvd.1,uc008vve.1,uc008vvf.1,uc008vvg.1,uc008vvh.1,uc008vvi.1'	4	0.593627	1.67475	2.17492	1.46346
Fanca	'uc009nvd.2,uc009nve.2,uc009nvf.1,uc009nvg.1,uc009nvh.1,uc009nvi.1'	6	0.789356	1.82186	3.24977	2.00444
Llph	'uc007hfa.1'	2	0.736811	1.32711	1.60938	1.04095
Rhoa	'uc009rpe.2'	3	0.837919	0.96489	1.72532	1.72216
	'uc007gqe.2,uc007gqf.1,uc007gqh.1'	3	0.965316	1.11763	1.37941	1.26945
Gid4	'uc007jfw.2,uc007jfx.2'	2	-0.00728268	0.901595	1.22463	0.15944
Orc5	'uc008wpq.1'	3	0.989254	1.01306	1.71	1.2029
Tor1a	'uc008jdc.2'	3	0.966286	1.865	2.65809	1.81769
Lsmd1	'uc007jqa.1,uc007jqb.1'	3	1.01111	1.05415	3.92895	2.34489
Otos	'uc007cbr.1'	4	0.794313	1.54158	1.79709	1.06111
Fam192a	'uc009mwn.2'	4	0.471194	1.92067	1.98586	1.42625
Bloc1s1	'uc007hoz.1'	2	0.478178	1.73346	1.93552	1.16371
Spice1	'uc007zhf.2,uc007zhg.2,uc007zhh.1'	4	0.842184	1.20911	1.38754	1.03075
Mutyh	'uc008uhm.2,uc008uhn.2,uc012djn.1'	4	0.824893	1.13032	2.14494	1.63815
Gcn1l1	'uc008zee.1,uc008zef.1,uc008zeg.1,uc012ecf.1'	2	0.983696	1.17432	1.31084	0.18371
Rad54b	'uc008rzs.1'	6	0.589314	2.31789	3.56007	2.99089
Mtfp1	'uc007hug.1'	3	0.610129	1.28494	1.31287	0.504032
Psmg1	'uc008ach.1'	3	0.697672	1.48708	2.92752	1.46596
Blm	'uc009iaw.2,uc009iax.2,uc009iay.2'	6	0.455153	2.05763	2.4538	2.25896
Rbbp4	'uc008uwt.1'	5	0.951014	1.4122	1.98769	1.42246
Mre11a	'uc009ofc.1,uc009ofd.1'	3	0.547951	1.40948	2.38746	1.89484
Orc2	'uc007bcc.1,uc007bcd.1,uc007bce.1'	3	0.756879	1.56342	1.65584	1.06555
Nubp1	'uc007ydn.2,uc007ydo.2'	3	0.713207	1.58258	2.44229	1.60061
Htra2	'uc009clu.2,uc009clv.2,uc009clw.1,uc009clx.1'	3	1.01623	1.33637	2.07687	1.35148
Myst2	'uc007lad.2,uc007lae.2,uc007laf.2'	2	0.642913	1.43342	2.02418	1.805
Wdr4	'uc008bvb.2,uc008bvc.2,uc008bvd.2,uc012aou.1'	3	0.929796	1.20315	2.13813	1.18854
Cpsf1	'uc007wkx.1,uc007wky.2,uc007wkz.2,uc007wla.2'	3	0.830366	1.26854	2.23852	1.72862
Mecr	'uc008vae.2'	5	0.903325	1.61671	2.39464	1.2718
Nip7	'uc009ngz.2,uc012gka.1,uc012gkb.1'	4	0.953977	1.23928	1.38951	0.74329
Cdca5	'uc008ghh.1,uc008ghi.1'	6	0.707545	1.74724	5.69253	4.91862
Tmem109	'uc008gre.1'	5	0.802834	2.03758	3.86196	1.27279
Ssu72	'uc008wej.2,uc008wek.2,uc008wel.2'	3	1.30584	1.0003	1.8154	1.44557
Saal1	'uc009gyt.2,uc009gyu.2,uc009gyv.2'	2	0.782259	1.38245	1.52534	0.721906
	'uc007swr.2,uc007sws.1'	3	0.981099	1.371	2.79071	2.07482
Ezr	'uc008ahv.1'	2	0.66269	1.50895	2.1679	1.58805
Mphosph6	'uc009npg.1'	3	0.920447	1.16426	2.39613	1.54067
Angptl4	'uc008bzp.2,uc012apl.1'	4	0.738497	1.1933	2.07906	0.493676
Srrm1	'uc008vge.2,uc008vgf.2,uc008vgg.2,uc012dmz.1'	2	0.836372	1.07518	1.10396	0.77019
Ctc1	'uc007jow.2,uc007jox.2,uc007joy.2,uc007joz.2,uc011xwt.1'	4	0.556886	1.83331	2.85731	2.17418
Mrps12	'uc009fzo.1'	3	0.376043	1.61247	1.82932	1.62293
Traf7	'uc008awq.2,uc008awr.2,uc008aws.2,uc012aml.1'	3	0.230188	1.76201	2.57496	2.23048
Mrps10	'uc008cuy.2,uc008cuz.2,uc008cva.1,uc012auv.1'	2	0.948091	1.44883	1.96478	1.84819
Nup160	'uc008ksw.1,uc008ksx.1,uc008ksy.1,uc008ksz.1,uc008kta.1'	6	0.696937	1.42217	3.0416	2.27493
Nefh	'uc007hvm.1'	3	0.738071	0.831017	1.48719	-0.519146
Rrp15	'uc007dzq.1'	3	0.688452	1.55307	1.83181	0.749834
Pdlim1	'uc008hkk.2,uc008hkl.2'	4	1.17201	1.06441	1.47154	1.13738
Sh3glb2	'uc008jcc.1,uc008jcd.1,uc008jce.1'	3	0.68025	1.41621	1.59125	0.143427
Fam178a	'uc008hqb.1,uc008hqc.1,uc012bmh.1,uc012bmi.1'	3	0.519352	1.20803	1.39948	0.309581
Cdk2ap1	'uc008zpo.1'	2	0.729095	1.38813	1.89395	0.965905
Pbk	'uc007ujo.1'	6	0.328558	3.37096	8.07297	7.02436
Mdh2	'uc008zyz.1'	2	0.665442	1.27279	1.43901	0.974073
Sec61g	'uc007ibl.2,uc007ibm.2,uc011xrs.1'	3	1.01539	1.37018	1.93787	1.74701
	'uc008agq.1'	2	1.10276	1.0514	2.07638	1.95526
2014-09-15	'uc008rpr.1'	2	0.911436	0.996512	1.94521	1.39478
Pms2	'uc009aky.1,uc009akz.1,uc009ala.1,uc009alb.1,uc009alc.1,uc012egk.1,uc012egl.1'	3	0.690353	1.34534	2.80925	1.3182
Nptn	'uc009pxd.1,uc009pxe.1,uc009pxf.1,uc009pxg.1'	4	0.532228	1.41125	1.9303	0.963192
Hdgf	'uc008ptc.2'	3	0.737898	1.52119	2.15822	0.990143
Rad51ap1	'uc009dvi.1,uc009dvj.1,uc009dvk.1'	6	0.348948	2.76916	5.01764	3.05258
Trmt6	'uc008mng.1,uc008mnh.1'	3	0.414743	1.71021	2.41621	0.653964
Pask	'uc007cdq.1,uc007cdr.1,uc007cdt.2,uc007cdu.1'	6	0.633146	1.78334	3.58466	1.83659
Nsl1	'uc007eca.2,uc011wyq.1'	6	0.589713	1.95533	4.69519	4.13281
Spata24	'uc008emn.1,uc008emo.2,uc008emp.2'	4	0.577664	1.4763	2.18889	1.43316
Polr2k	'uc007vml.1,uc007vmm.1'	3	0.365809	1.18676	2.57396	2.17018
	'uc007pga.2,uc007pgb.2'	6	0.467845	1.87608	2.94307	2.25598
Jmjd6	'uc007mmh.1,uc007mmi.1,uc007mmj.1,uc011yid.1,uc011yie.1,uc011yif.1'	2	0.708028	1.00276	1.45385	0.910886
	'uc008zau.1'	2	0.741601	1.29977	1.34282	0.621795
Ppm1g	'uc008wxr.1'	6	0.974602	1.63377	2.99575	1.13798
Uck1	'uc008jes.2'	4	0.936178	1.55061	1.83197	1.06342
	'uc009cuh.1,uc009cui.1'	3	0.595467	1.46706	1.48531	1.48049
Tcf19	'uc008chv.2,uc008chw.2,uc012arm.1'	6	0.443883	2.30017	6.15215	1.82141
Chmp6	'uc007mrd.2'	3	0.857263	1.08457	2.61687	1.36303
Ywhag	'uc008zzf.2,uc008zzg.2,uc008zzh.2'	2	0.396763	1.10761	1.32402	0.507653
Rtn3	'uc008glb.1,uc008gld.1,uc008gle.1,uc008glf.1,uc012bhv.1'	3	0.811257	1.32305	1.93751	1.45177
Prkag1	'uc007xoa.1'	2	1.1289	0.721306	2.82637	2.19285
Ranbp3	'uc008dct.1,uc008dcu.1,uc008dcv.1,uc008dcw.1'	2	0.572856	1.25528	2.10758	1.62147
Eif2d	'uc007cmx.2,uc007cmy.2,uc007cmz.2,uc007cna.2,uc007cnb.2,uc011wrn.1'	4	0.251567	1.67748	2.50209	1.68858
	'uc007vta.1,uc007vtc.1'	3	0.619693	1.77429	1.78465	0.897674
Nsg1	'uc008xga.1'	3	0.172146	0.85539	1.37718	0.247125
Ube2g1	'uc007jzc.1,uc007jzd.1,uc007jze.1,uc007jzf.1'	2	0.738751	0.848123	1.31887	0.764959
Fam195a	'uc008bck.1'	2	0.173942	1.37482	1.719	0.443051
Gtf2f1	'uc008ddp.1'	3	0.715663	1.68801	2.17689	2.02383
Zbtb8os	'uc008uwu.1,uc008uwv.1'	3	0.587979	1.47482	2.95765	1.70518
Tmem161a	'uc009lzc.1,uc009lzd.1,uc009lze.1,uc012geu.1,uc012gev.1,uc012gew.1'	2	0.2734	0.773153	1.85096	0.073608
Anp32a	'uc009qah.2'	2	0.978766	1.27211	1.3653	1.12256
Arf2	'uc007lvx.1,uc007lvy.1'	2	0.73582	1.05291	1.92529	1.86539
Sod1	'uc007zvz.1'	3	-0.0183876	0.968185	1.32264	0.511921
Smyd4	'uc007kdl.1,uc007kdm.1,uc007kdn.1,uc007kdo.1'	4	0.562956	1.22179	1.55984	1.1844
	'uc007tcw.1'	2	0.376955	0.714308	1.55577	0.384588
Mrps11	'uc009hxm.2,uc009hxn.2'	3	0.739355	1.20884	2.34281	1.85292
Naa40	'uc008gkk.2,uc008gkl.2,uc008gkm.2,uc012bhu.1'	5	0.791272	1.14471	3.06161	0.833052
Haus8	'uc009mcg.2,uc009mch.2,uc012gfo.1'	6	0.567951	1.4936	4.76194	2.89718
Tpm1	'uc009qfo.1,uc009qfp.1,uc009qfq.2,uc009qfr.2,uc009qfs.1,uc012gvr.1,uc012gvs.1,uc012gvt.1,uc012gvu.1,uc012gvv.1,uc012gvw.1,uc012gvx.1'	2	0.185344	0.859236	0.991086	0.170611
Fastkd2	'uc007bgk.2,uc007bgl.2'	3	0.769385	1.20954	1.41701	1.08953
Rpf1	'uc008rrl.2,uc008rrm.2,uc012czh.1'	4	0.817637	1.20658	2.61306	2.4808
Mak16	'uc009lji.1'	2	0.735727	1.05801	1.68353	1.3881
Rars2	'uc008sgf.2,uc008sgg.2'	2	1.08217	0.914608	1.80929	0.798931
Oip5	'uc008ltz.1'	6	0.621909	1.1175	3.60423	3.44545
Cldn25	'uc007zoc.1,uc007zod.1'	2	0.832558	0.820442	1.34597	0.618157
Mina	'uc007zpg.2,uc007zph.2,uc007zpi.2,uc012agx.1'	2	0.636102	1.3171	1.5786	1.07923
Egfl7	'uc008ivp.2,uc008ivq.2,uc008ivr.2,uc008ivs.2'	2	1.03011	0.980386	2.49707	0.754193
Elmo2	'uc008nxi.1,uc008nxj.1,uc008nxk.1,uc008nxl.1,uc008nxm.1,uc008nxn.1'	4	0.332946	1.66689	2.1034	1.98231
Metap2	'uc007gvc.1,uc007gvd.1,uc007gve.1,uc007gvf.1,uc011xlx.1'	3	0.669999	1.32714	1.76544	0.94472
Hexa	'uc009pxw.1'	2	-0.104794	1.97639	2.07115	1.47735
Sssca1	'uc008gfd.1'	4	0.652199	1.61232	2.04833	0.841848
	'uc008bcl.2'	4	0.0391239	1.90265	1.99204	0.729443
Fancg	'uc008sos.2,uc008sot.2,uc012dcv.1'	4	0.855341	1.39539	2.03377	1.15336
Gnb1l	'uc007yoa.1,uc007yob.1,uc007yoc.1,uc007yod.1,uc007yoe.1,uc007yof.1,uc012ach.1'	2	0.659297	1.21137	1.82931	0.184649
Paox	'uc009kha.1,uc009khb.1,uc009khc.1,uc012fwh.1'	2	0.682401	0.945585	1.67439	1.21748
Pkig	'uc008nth.2,uc008nti.2,uc008ntj.2,uc008ntk.1,uc012ciw.1'	3	0.698408	1.06222	1.24979	0.851151
Cct4	'uc007ien.1,uc007ieo.1'	2	1.21056	0.656463	1.5835	1.49453
	'uc007aqg.2'	4	0.752741	1.0956	2.18824	1.9887
Chtf18	'uc008bbk.2,uc012ani.1'	6	0.324518	1.84911	3.22777	3.09083
Bag5	'uc007pdr.2,uc007pds.2'	2	1.04496	1.0976	2.13435	1.14951
Pop7	'uc009aco.1'	4	0.752675	0.973072	3.02661	1.04957
Fanci	'uc009hyg.1,uc009hyh.1,uc009hyi.1'	6	0.512909	1.72722	4.13856	3.45446
Gng10	'uc008szp.1'	2	0.736981	1.13036	2.66813	1.66861
Pmm1	'uc007wxt.2,uc007wxu.2,uc011zwm.1'	2	0.0311902	1.0249	1.49	0.290289
Npm1	'uc007ikd.1,uc007ike.1,uc007ikf.1'	4	0.761338	1.0016	1.10521	0.586888
Ddb2	'uc008kvg.2,uc008kvh.2,uc008kvi.2,uc008kvj.2'	2	0.46545	0.893777	1.39135	0.44165
Npepl1	'uc008oeo.2'	2	0.349882	1.22469	1.23277	-0.331556
Gpx4	'uc007gbj.1,uc007gbk.1,uc007gbl.1'	3	0.626451	1.37216	1.77857	0.987805
Tmem11	'uc007jgs.2,uc011xvs.1'	3	0.875765	1.494	1.9072	1.61626
Tonsl	'uc007wle.2,uc011zux.1'	6	0.355556	1.56586	2.25866	0.815327
Dnajb11	'uc007yso.2,uc007ysp.2,uc012adp.1'	4	0.686541	1.57168	1.98592	1.3843
Sumo2	'uc007mhw.1,uc011yhm.1'	2	0.897699	0.984294	1.08483	0.843887
Zdhhc16	'uc008hmp.2,uc008hmq.2,uc008hmr.2,uc008hms.1,uc008hmt.1,uc008hmu.2'	4	0.0427832	1.89781	2.62038	2.35276
Brca1	'uc007lpd.2,uc007lpe.2,uc007lpf.1,uc011yfm.1'	6	0.620639	1.60936	3.40843	2.14479
Hnrnpab	'uc007itz.1,uc007iua.1,uc007iub.1'	4	0.847825	1.06444	1.74936	1.09665
Gm20427	'uc008cav.1,uc008caw.1'	2	0.663459	1.23228	1.3135	1.01812
Znhit3	'uc007kre.1,uc007krf.1'	4	0.732988	1.62875	2.29452	2.06716
Xrcc3	'uc007pdy.1,uc007pdz.1'	6	0.445701	1.71666	1.7921	1.38307
Exosc3	'uc008ssk.1,uc008ssl.1'	3	0.572584	1.05517	1.55543	1.1467
Casp3	'uc009lqk.1,uc009lql.1,uc009lqm.1'	4	0.680375	1.17331	2.96813	1.71513
Nup155	'uc007vei.1,uc007vej.2,uc007vek.2'	6	0.644186	1.44725	2.90458	1.69557
Aup1	'uc009cly.1,uc009clz.1,uc009cma.1'	3	0.480271	1.14364	1.58286	1.16751
	'uc007gjp.2,uc011xjp.1,uc011xjq.1'	3	0.933538	1.21782	1.73195	0.578875
Ercc6l	'uc009tyk.2'	6	0.35054	1.94894	3.28089	2.70519
Fxc1	'uc009iys.1,uc009iyt.1,uc009iyv.1,uc009iyw.1'	3	0.981927	1.39269	2.30252	1.43534
Bcl2l12	'uc009gsk.2,uc009gsl.1,uc012fjz.1'	4	0.619458	1.20274	2.09901	1.34663
Fam105a	'uc007vjs.1,uc007vjt.1,uc007vju.1'	2	0.677558	1.23924	1.2501	0.730128
Abcf1	'uc008cjk.1'	2	0.616931	1.16495	2.23066	1.26155
Pgm2	'uc008tva.2,uc008tvb.2'	2	0.46475	0.867586	1.07196	0.0866717
	'uc007qxb.2'	4	0.833745	1.076	1.47965	0.480397
Gadd45gip1	'uc009mnj.1'	3	0.733603	1.27782	1.85354	1.31243
Gins3	'uc009myr.1'	6	0.559444	1.41308	1.84805	1.55139
Mrps22	'uc009rdn.2,uc009rdo.2'	4	0.530339	1.2371	2.44072	1.88964
Csda	'uc009eis.1,uc009eit.1'	2	0.503651	1.01384	1.57626	0.476144
Etf1	'uc008elu.1'	3	0.819608	1.21138	1.48066	1.12976
Emc6	'uc007kab.2,uc011xyo.1'	3	0.999457	1.12994	2.64919	1.64621
	'uc008ava.1,uc008avb.1,uc008avc.1'	4	0.497207	1.38056	1.93423	0.54502
Ybx1	'uc008ulu.1,uc008ulv.1'	2	0.634945	1.36224	1.93119	1.29187
Rrp1	'uc007fxs.1,uc011xht.1'	2	0.623969	1.30619	1.31723	0.885695
Carkd	'uc009kvf.2,uc009kvg.2'	4	0.556232	1.55804	2.07179	2.062
Rgs10	'uc009jyw.1,uc009jyx.1'	4	0.977995	0.918274	2.04452	1.0017
Mtbp	'uc007vsi.1,uc007vsj.1,uc011zsz.1'	5	0.561751	1.13958	2.062	1.31867
Ethe1	'uc009fqb.1'	3	0.530602	1.4254	2.42012	1.36082
Cmah	'uc007pvq.2,uc007pvt.2,uc007pvv.2,uc007pvw.1,uc007pvx.2,uc011yxl.1,uc011yxm.1,uc011yxn.1'	3	0.605044	0.998745	1.22667	0.361539
Ndufs4	'uc007rxm.2'	2	0.68444	1.17649	2.04329	1.68079
Tma16	'uc009lvo.1,uc009lvp.1'	2	0.706996	1.17546	1.18578	0.531236
Cep152	'uc008mcs.1,uc008mct.1,uc008mcu.1'	6	0.570919	1.15358	1.9924	1.56816
	'uc009qeb.1'	6	-0.111972	2.2097	7.68953	4.80264
Polr2i	'uc009gdt.1'	2	0.178858	1.60375	1.7959	1.12163
Klk8	'uc009gns.1'	3	1.02682	0.722833	1.70938	0.567418
Haghl	'uc008bbr.1,uc008bbs.1,uc008bbt.1,uc008bbu.1'	2	0.365443	1.18065	1.66051	-0.0900071
Ccnd3	'uc008cvk.1,uc008cvl.1,uc008cvm.1,uc008cvo.1,uc008cvp.1'	4	1.12772	0.770699	1.56913	0.47456
Cklf	'uc009nac.1,uc009nad.1,uc009nae.1,uc009naf.1,uc009nag.1,uc012giw.1'	2	0.611737	1.42494	1.53288	1.33459
Lsm12	'uc007lqs.1'	4	0.58924	1.46359	2.11913	1.14223
Pcyt2	'uc007mtp.1,uc007mtq.1,uc011yje.1'	2	0.695216	1.26422	2.01588	1.45915
Nup133	'uc009nws.2,uc009nwt.1'	5	-0.0503726	1.49226	2.4606	2.05096
Tmed2	'uc008zqa.1,uc008zqb.1'	5	0.647204	1.31122	2.13148	1.30854
Cmc1	'uc009rzl.2,uc009rzm.2'	3	0.460099	1.16342	1.7053	0.818255
Thap7	'uc007ylc.1,uc007yld.1'	3	0.15635	1.0959	1.93938	-0.0741096
Tfg	'uc007zmv.1,uc012ags.1'	2	0.850132	1.00137	2.2208	1.27683
Rps15	'uc007gcn.2'	2	0.903312	0.8208	1.13011	0.69741
Timm9	'uc007nuh.1,uc007nui.1,uc007nuj.1,uc007nuk.1,uc007nul.1'	2	0.9515	0.987918	2.26832	1.33736
Fkbp11	'uc007xnm.1,uc007xnn.1,uc007xno.1'	4	0.580286	1.19115	1.71889	0.231893
Ogdh	'uc007hyf.1,uc007hyg.1,uc007hyh.1,uc007hyi.1,uc007hyj.1,uc007hyk.1'	3	0.879072	0.957834	1.79242	1.15475
Hirip3	'uc012ftw.1'	4	0.797071	1.06925	2.53812	2.21535
Wrap53	'uc007jqj.1,uc007jqk.1'	5	0.394286	1.43874	1.60399	1.2401
Cnp	'uc007llo.2,uc007llp.2'	3	0.647266	1.56558	1.94677	1.69881
Pnkd	'uc007bls.1,uc007blt.1,uc007blu.1,uc007blw.1'	3	1.36851	0.52262	1.85573	1.54368
	'uc007pkn.2'	2	0.389842	1.72788	2.64823	1.0727
Setdb2	'uc007uei.1,uc007uej.1,uc011zmm.1,uc011zmn.1,uc011zmo.1,uc011zmp.1,uc011zmq.1,uc011zmr.1,uc011zms.1,uc011zmt.1'	3	0.411055	1.16767	1.27288	1.18971
Nif3l1	'uc007bbz.1,uc007bca.1,uc007bcb.1'	2	0.612582	1.05683	1.16146	0.943598
	'uc008erx.2,uc008ery.2,uc008erz.2'	5	0.816039	1.00846	1.97769	1.5261
Trim37	'uc007ktm.1,uc007ktn.1,uc011ybw.1'	4	0.412354	1.22958	1.56581	0.80945
Rbbp5	'uc007cow.2,uc007cox.2,uc007coy.2'	3	0.394812	1.17705	1.58587	0.651503
Decr1	'uc008sbm.1'	2	1.0184	0.747039	1.91288	1.05151
Slc31a1	'uc008ten.2,uc008tep.1'	3	0.799157	1.13641	1.73409	1.20239
	'uc009qbm.2,uc012gva.1'	6	0.207812	1.45218	3.68638	3.58372
	'uc008tjk.1'	2	0.794156	1.17211	1.3456	1.09135
Ppp1cb	'uc008wzq.2,uc008wzr.2,uc012dup.1'	3	0.734303	1.26602	1.57911	1.04325
Srsf1	'uc007kvc.1,uc007kvd.1'	3	0.537096	1.23885	1.78794	0.589862
Ddt	'uc007fra.1'	2	0.654845	1.02891	1.33184	0.865139
Dars2	'uc007dey.1,uc007dez.1'	5	0.704543	1.12561	2.12405	2.07749
Pdss1	'uc008inp.1,uc008inq.1'	5	0.81674	1.4459	1.90201	1.46412
	'uc007yfd.2,uc007yfe.2,uc007yff.2,uc007yfg.1'	2	0.752449	1.07786	1.20566	0.761095
Slc25a10	'uc007mtb.2'	4	0.545637	1.312	2.92399	1.42354
Ccdc69	'uc007iyu.1,uc007iyv.1'	3	1.09692	0.153286	1.20078	0.810985
Snapc5	'uc009qbo.1'	2	0.722982	0.778805	2.00792	1.97435
Qrich1	'uc009rqb.2,uc009rqc.2,uc009rqd.2,uc009rqe.2,uc009rqf.1'	2	0.605809	1.24893	1.81807	1.41774
Qtrtd1	'uc007zgj.1,uc007zgk.1,uc007zgl.1,uc007zgm.1,uc012aft.1'	2	0.568385	1.01001	1.21225	0.516558
Mettl1	'uc007hhp.1,uc007hhq.1,uc007hhr.1'	2	0.0580482	1.14991	1.24185	0.118715
Srfbp1	'uc008exd.1'	2	0.297136	1.22052	1.62931	0.825308
Pycard	'uc009jxu.2'	3	0.575457	1.32959	2.05669	0.812827
Eri3	'uc008uis.1,uc008uit.1,uc008uiu.1,uc008uiv.1'	2	0.520911	1.19997	1.58448	1.14432
Gcat	'uc007wse.2,uc007wsf.2'	3	0.32684	1.228	1.36758	1.04572
Zranb2	'uc008rve.1,uc008rvf.1'	2	0.657913	1.12923	1.82943	1.05754
Tbc1d15	'uc007hax.2,uc007hay.1'	3	0.40317	1.47073	2.20329	1.91162
Ppp1r8	'uc008vbw.2'	3	0.794755	1.03536	1.54951	1.40901
Mum1	'uc007gch.1,uc011xin.1'	3	0.374766	1.06331	2.03907	0.602414
	'uc007ksg.1,uc007ksh.1'	4	0.613576	1.24446	2.05447	1.89122
Mrpl10	'uc007ldm.1'	3	0.33396	1.18656	2.0738	1.62497
Ptma	'uc007bvp.1'	6	0.865323	1.03162	1.21708	0.912635
Ddx27	'uc008nza.1,uc008nzb.1'	3	0.163459	1.48036	2.2148	1.40277
	'uc008pye.2,uc008pyf.2,uc012csi.1'	3	0.362293	1.41455	2.71151	1.70242
Mycbp	'uc008uqk.1,uc008uql.1'	6	0.567598	1.14602	2.43082	1.87882
Mlf1ip	'uc009lqg.1,uc009lqh.1,uc012gdk.1'	6	-0.0739556	1.35453	4.03016	1.7152
Mns1	'uc009qpx.2'	6	0.372165	1.25421	3.96332	3.29716
Apoa1bp	'uc008ptu.1'	2	0.566786	1.49326	1.7314	1.36618
Stag2	'uc009taw.1,uc009tax.1,uc009tay.1,uc009taz.1'	3	0.674963	1.12229	2.22172	1.14816
Hdlbp	'uc007cdx.1,uc007cdy.1,uc007cdz.1'	3	1.06047	0.97069	2.10132	1.1203
E2f8	'uc009haz.2,uc009hba.2'	6	0.149881	1.24124	4.05503	2.63493
Uba1	'uc009stl.1,uc009stm.2'	2	0.575873	1.1993	1.88915	1.68759
Trub2	'uc008izy.2,uc008jaa.2,uc012bth.1'	2	1.07236	0.726855	1.93295	0.476228
Ncln	'uc007gig.1'	4	0.605201	1.14222	1.44203	1.05653
Mrpl13	'uc007vsf.1,uc007vsg.1,uc007vsh.1'	3	0.799488	0.984023	1.89693	1.38956
Aurkb	'uc007jpa.1'	6	0.251112	1.08453	7.31659	6.74507
Nfx1	'uc008sic.1,uc008sid.1,uc008sie.1'	2	0.487923	0.87604	2.44658	0.0906554
Cenpo	'uc007mxn.1,uc007mxo.1,uc007mxp.1'	5	0.425745	1.20054	2.07047	1.75934
Utp3	'uc008xzv.1'	2	0.95429	0.659809	2.072	1.75904
Tmem205	'uc009omw.1'	3	0.581794	1.04256	1.48692	1.1686
AI413582	'uc008bpe.1,uc008bpf.1'	2	0.562952	1.13115	2.13386	0.251709
Sass6	'uc008rcm.1,uc008rcn.2,uc012cwr.1,uc012cws.1'	5	0.525989	1.13999	2.57636	2.12806
Apmap	'uc008mud.1,uc008mue.1'	3	0.536892	1.02694	2.33782	1.22927
Psmb4	'uc008qhe.2'	2	0.0784897	1.55177	1.9936	1.9879
Snrnp27	'uc009csj.1,uc009csk.1'	4	0.25616	0.820664	1.92072	1.70669
l7Rn6	'uc009igh.1,uc009igi.1,uc009igj.1'	2	0.859994	1.00759	3.1455	2.11427
Ndufs1	'uc007bfu.2,uc007bfv.2,uc007bfw.1,uc007bfx.2,uc007bfy.2,uc011wmd.1'	3	0.173194	1.15804	2.45301	2.247
Bcl7a	'uc008znn.2,uc008zno.2'	5	0.498515	1.11134	1.25779	0.554582
Emc7	'uc008lpb.1,uc008lpc.1'	2	0.75938	1.20653	1.66183	1.6511
Dnajb1	'uc009mkp.2,uc009mkq.2'	2	0.660682	1.13209	2.08188	1.62182
Tcof1	'uc008fbb.2,uc008fbc.2,uc012bdm.1,uc012bdn.1'	3	0.638326	1.13573	2.12549	0.856686
Snord45c	'uc008ruf.2,uc008rug.2,uc008rui.2,uc012czq.1,uc012czr.1,uc012czs.1,uc012czt.1,uc012czv.1'	3	0.601394	1.05057	2.32348	0.641771
Pus1	'uc008yrm.1,uc008yrn.1,uc008yro.1,uc008yrp.1'	2	0.802114	0.841062	1.73825	0.638449
Copb1	'uc009jhx.1'	2	-0.140579	1.28919	1.96001	1.65788
Nme6	'uc009rst.1,uc009rsu.1'	3	0.757492	1.12185	2.01677	1.81206
Ltn1	'uc007zuf.1,uc007zug.1,uc007zuh.1'	4	0.449261	1.30851	1.73618	1.67125
Nat15	'uc007xyv.1,uc007xyw.1,uc007xyy.1'	2	0.507626	1.11755	2.23515	1.66288
Rpap3	'uc007xkv.1'	2	0.865736	0.838563	2.21035	1.21698
Gtf3a	'uc009ano.2'	4	0.632524	0.877262	2.81301	1.15049
Polr3h	'uc007wxq.1,uc007wxr.1'	3	0.350969	1.0364	1.83668	0.886467
Mrps35	'uc009ess.1'	2	0.240185	1.16504	1.75057	0.941052
Pds5b	'uc009auh.1,uc009aui.1,uc009auj.1'	3	0.693109	0.881655	2.21725	1.63713
Pdcl3	'uc007atc.1'	2	0.0910282	1.03586	1.39619	1.27277
H2afj	'uc009eme.1'	3	0.65595	1.06785	1.36846	0.659963
Wars	'uc007pag.2,uc007pah.2,uc007pai.2,uc007paj.2'	3	0.122362	1.11403	1.30202	0.595483
Uap1	'uc007dlw.1,uc007dlx.1,uc007dly.1,uc007dlz.1'	3	0.927367	0.832455	1.93495	0.939088
Pex11b	'uc008qnm.2,uc008qnn.2,uc008qno.2,uc008qnp.2,uc012cty.1'	2	0.672012	0.793154	2.19097	0.891455
Srpr	'uc009osy.1,uc009osz.1'	3	0.138859	1.17923	1.95982	1.17885
Vps36	'uc009lct.1,uc009lcu.1'	2	1.02793	0.810935	1.72511	1.65697
Galnt1	'uc008egq.2,uc008egr.2'	3	0.361762	1.06571	1.61213	1.01163
Arcn1	'uc009pei.1,uc009pej.1'	3	0.468027	1.17033	2.13653	1.65845
Ap3s2	'uc009hzf.2'	2	0.771183	0.775623	1.5539	0.769331
Copg	'uc009cuf.1,uc009cug.1'	3	0.99196	0.670545	1.81552	1.56366
D10Wsu102e	'uc007gkg.2'	2	0.903029	1.14369	2.1707	1.4394
Pcm1	'uc009lnq.2,uc009lnr.2,uc009lns.1,uc009lnt.1,uc009lnu.1'	2	0.578249	0.899488	1.53705	0.738171
Plk4	'uc008pbm.1,uc008pbn.1,uc008pbo.1,uc012cpb.1,uc012cpc.1'	6	0.17268	1.08973	2.69711	2.35247
Sar1a	'uc007fgg.1'	2	1.14167	1.0821	2.05445	1.8165
Pop4	'uc009gkv.1'	2	0.616154	1.05807	2.17429	1.8264
Kdm2b	'uc008zmq.1,uc008zmr.1,uc008zms.1,uc008zmt.1,uc008zmu.1,uc008zmv.1'	2	0.573488	0.887439	1.31937	0.457561
Enkd1	'uc009ndy.1,uc009ndz.1'	5	0.548272	0.897095	1.54517	0.671327
Mnd1	'uc008ppv.2'	5	0.0068383	1.10922	2.10192	1.31349
Arl6	'uc007zpl.2,uc007zpm.2'	2	0.296783	0.832504	1.39938	0.181022
Mrps23	'uc007kvi.1,uc007kvj.1'	4	0.454168	0.78308	2.89613	1.56577
Gm3604	'uc007qwy.2,uc007qwz.2,uc007qxa.2'	4	1.12727	0.882676	1.57196	1.14985
Wdr46	'uc008cai.1'	2	-0.054114	1.10119	1.49443	0.27053
Creld2	'uc007xep.1'	2	0.55988	0.994909	2.00313	1.02667
Pus7	'uc008wqn.1,uc008wqo.1,uc012dsw.1'	2	0.311716	0.835205	1.53032	0.272713
Nvl	'uc007dxb.1,uc007dxc.1,uc007dxd.1'	2	0.267433	1.16763	1.49417	1.23361
Ticam2	'uc008evp.2'	2	0.152952	1.18761	1.8438	1.12973
Actr1a	'uc008htm.1,uc012bmz.1'	2	0.295471	1.24872	2.51491	1.95411
Ywhab	'uc008ntp.1'	2	0.578908	1.30305	2.16631	1.40069
Sgk3	'uc007agu.1,uc007agv.1,uc007agw.1,uc007agx.1,uc007agy.1,uc011wid.1'	2	0.741963	0.931274	1.90964	1.29656
Flot2	'uc007khw.1,uc007khx.1,uc007khy.1,uc011yad.1'	2	0.596641	0.938211	1.86463	0.742615
Snord87	'uc007aha.1'	2	0.74741	1.02026	1.74217	0.549805
Gpd2	'uc008jsc.2,uc008jsd.1,uc008jse.2'	3	0.550553	0.915691	1.21833	0.628043
Kbtbd4	'uc008kts.1,uc008ktt.1'	2	-0.166495	0.62063	1.60603	0.50054
Vps35	'uc009mpo.1'	3	0.77643	1.04379	2.00769	1.67548
Abhd16a	'uc008cfq.1'	2	0.430803	1.21788	1.2486	0.965368
Degs1	'uc007dxw.1,uc007dxx.1'	2	0.558986	1.08766	1.58097	0.56716
Aunip	'uc008vfg.1'	6	0.198492	1.18492	2.21618	1.56163
Aen	'uc009hxp.1,uc009hxq.1,uc009hxr.1,uc009hxs.1'	2	0.56289	1.12052	1.26971	0.713439
Cdv3	'uc009rgn.1,uc009rgo.1,uc009rgp.1,uc009rgq.1,uc009rgr.2,uc009rgs.1'	2	0.441092	0.684485	1.9918	0.794077
Txndc17	'uc007jyj.1'	3	0.203947	1.17316	2.36628	1.75344
Dhx29	'uc007rwv.1,uc007rww.1,uc007rwx.1,uc007rwy.1'	2	0.314107	0.640048	1.52846	0.36323
Klhl22	'uc007ylz.1,uc007ymb.2,uc007ymc.2'	4	0.738572	0.956898	1.75292	0.482152
Pter	'uc008ijt.1,uc008iju.1,uc012bqx.1'	2	0.789697	0.7637	1.18449	0.971103
BC030867	'uc007lqz.1,uc011yfq.1'	6	-0.0425573	0.96555	3.24974	2.69017
Pum2	'uc007mzu.2,uc007mzv.2,uc007mzw.2,uc007mzx.2,uc007mzy.2,uc007mzz.2,uc007naa.2'	4	0.187322	1.17405	1.86041	1.26351
Ppif	'uc007srr.1'	5	0.575346	1.27659	1.43357	0.912769
Hspa5	'uc008jis.2,uc008jit.2'	2	0.855104	0.933002	1.47393	0.990126
	'uc009jtx.1'	3	0.796983	1.11399	1.77733	1.20438
Erp44	'uc008suy.1'	3	0.409181	0.87452	2.14495	1.26197
Nmt1	'uc007ltd.1'	2	0.572873	0.928616	2.04284	1.96607
Pars2	'uc008tyo.1,uc008typ.1'	3	0.688537	0.925119	2.18044	0.876882
Agpat2	'uc008ivt.1,uc008ivu.1,uc008ivv.1'	3	0.465614	0.552392	1.25206	0.502903
Slc43a1	'uc008kji.1,uc008kjj.1,uc008kjk.1,uc008kjl.1'	5	0.184301	1.11962	1.67608	0.235248
Mrps26	'uc008mjf.1'	4	0.454132	0.927554	1.16246	0.719233
	'uc009nom.1,uc009non.1,uc012glg.1'	6	0.389915	0.89063	2.87402	2.23995
Dsn1	'uc008noj.2,uc008nok.2'	5	-0.0589854	1.20196	2.97931	2.53885
Tubb6	'uc008fmd.1,uc008fme.1'	3	0.320959	0.975083	2.40783	0.7672
	'uc009abd.2,uc009abe.2'	4	0.58716	1.08122	1.69352	1.04071
Snd1	'uc009bct.1,uc012eiu.1'	3	0.09517	0.996974	1.5265	0.725143
Xrcc1	'uc009fpx.2,uc009fpy.1,uc009fpz.2,uc012ffm.1'	3	0.237058	0.904312	1.41497	1.11549
Retsat	'uc009cix.1'	3	0.268404	0.67695	1.70444	0.17886
Fbxo5	'uc007egj.1'	6	0.176772	0.725101	5.63054	5.11832
Cln6	'uc009qan.1,uc012gut.1'	5	0.753456	0.806592	2.19534	0.557551
Cfp	'uc009sub.1'	2	0.460334	1.08775	2.06108	0.448382
Tex2	'uc007lzb.1,uc007lzc.1,uc007lzd.1'	3	0.24784	1.03817	1.735	0.648091
Katnb1	'uc009mxt.1'	3	0.970977	0.827059	2.20544	1.54011
Tubgcp4	'uc008lxu.1,uc008lxv.1,uc008lxw.1,uc008lxx.1,uc008lxy.1,uc008lxz.1,uc008lya.1,uc008lyb.1'	3	0.555723	0.951067	1.61348	1.59995
Tm9sf4	'uc008nhd.1,uc008nhe.1,uc008nhf.1,uc008nhg.1,uc008nhh.1'	2	0.766923	0.714397	1.74349	1.64387
Hemgn	'uc008str.1,uc008sts.1'	3	0.719403	0.975937	1.23481	0.502332
Hist1h2ap	'uc007prq.2'	6	0.109185	0.756277	5.17407	4.33623
Hist1h2ao	'uc007prt.2'	6	0.109185	0.756277	5.17407	4.33623
Uxs1	'uc007avq.1,uc011wka.1'	2	0.11881	0.553222	1.56847	0.367862
Ppia	'uc007hyn.1,uc007hyo.1'	6	0.768045	0.925581	1.17752	0.750466
Tmem41a	'uc007yrs.2,uc007yrt.2'	3	0.357882	1.16382	1.34183	0.478521
Tpd52l2	'uc008omk.1,uc008oml.1,uc008omm.1,uc008omn.1,uc008omo.1'	3	0.872395	0.999974	2.00878	1.77475
Rce1	'uc008gaj.1,uc008gak.1,uc008gal.1'	2	0.462152	1.06702	1.38979	1.28472
	'uc009ing.1,uc009inh.1'	3	0.185173	0.245634	2.16612	1.89203
Wdr83	'uc009mph.1'	2	0.167974	0.909911	1.92742	1.07666
Cnih4	'uc007dxe.2,uc011wxr.1'	2	0.50224	0.886616	1.3204	1.29038
Ube2e3	'uc008kgm.1,uc008kgn.1'	2	0.364756	1.06062	1.58289	1.26565
Pdia3	'uc008lzb.1'	2	1.13791	0.766804	1.66104	0.765268
Srl	'uc007xzt.1,uc007xzu.1'	3	0.288185	0.623553	1.1465	0.623047
Ccdc57	'uc007muu.1,uc007muv.1'	4	0.0208392	0.915774	0.943575	0.601322
Smc1a	'uc009upw.1,uc009upx.2'	2	0.581015	0.919123	1.53964	1.52268
Ccnh	'uc007ris.1,uc007rit.1,uc007riu.1,uc007riv.1'	3	0.212459	1.21519	1.37455	1.25709
Psd4	'uc008ioy.1,uc008ioz.1,uc008ipa.1'	2	0.0994096	1.2178	1.66376	0.918807
Tmem234	'uc008uxo.1,uc008uxp.1,uc008uxq.1,uc008uxr.1'	2	0.500972	0.850248	2.11318	1.78242
Cdk5rap3	'uc007lcv.1,uc007lcw.1,uc007lcx.1,uc011ydp.1'	2	0.515954	0.928812	2.44383	0.670418
Ghitm	'uc007tbx.2,uc007tby.2'	2	0.719428	1.13764	1.65103	1.07421
Zranb3	'uc007cld.1,uc007cle.1,uc007clf.1,uc007clg.1'	5	0.387351	0.891587	2.36581	1.40378
Rad1	'uc007vgh.1,uc007vgi.1'	3	0.838807	0.968273	2.08538	1.73493
	'uc009qpy.1,uc009qpz.1,uc009qqa.1,uc012gwq.1,uc012gwr.1,uc012gws.1'	4	0.5067	0.904652	1.79189	1.6345
Ccdc107	'uc008spy.1'	3	-0.131685	1.18653	1.60131	1.00531
Commd2	'uc008phd.1,uc008phe.1'	2	0.605946	1.10501	1.81824	1.22344
Ptbp1	'uc007gab.1,uc007gac.1,uc007gad.1'	3	0.11415	1.14818	1.68379	1.62557
Armc8	'uc009ref.2,uc009reg.1,uc009reh.1'	2	0.48356	0.908612	1.06084	0.954667
Tsen15	'uc007czf.2'	2	0.319909	1.07766	2.2804	0.965951
Gfm1	'uc008plm.2'	3	0.368129	1.0774	1.6765	1.35364
BC003965	'uc012amz.1'	2	0.159196	0.873606	2.13925	0.513979
Pigu	'uc008nki.1,uc008nkj.1'	4	0.510906	0.998415	2.06858	1.99663
Raf1	'uc009dix.1,uc009diy.1,uc009diz.1'	2	0.0653271	0.751355	1.12001	0.642185
Nmnat3	'uc009rdg.1,uc009rdh.1,uc009rdi.1,uc012gys.1'	3	1.10111	0.504841	1.76179	-0.267463
Psmf1	'uc008nek.1,uc008nel.1,uc008nem.1'	3	0.412577	1.05024	1.57899	1.51069
Rnaseh1	'uc007nft.2,uc007nfu.2'	3	0.290599	0.744399	2.22395	0.960148
Zmym1	'uc008uuc.1,uc008uud.1,uc008uue.1,uc008uuf.1,uc008uug.1,uc008uuh.1'	3	0.0573636	1.16881	1.81916	1.04847
Ttf2	'uc008qrb.2,uc008qrc.2'	3	0.280512	0.751872	2.27007	1.95811
Tdrkh	'uc008qgd.1,uc008qge.1,uc008qgf.1,uc008qgg.1'	4	-0.0993758	1.06293	1.53488	0.802918
	'uc007bgw.1'	5	0.0137171	0.886323	1.59601	1.06178
Magt1	'uc009ubh.2,uc009ubi.2,uc009ubj.2'	4	0.275919	0.775829	1.77908	1.24161
Acer3	'uc009ikg.1,uc012fpp.1'	3	0.352217	1.01347	1.23378	0.658454
Ddx11	'uc008dha.1,uc008dhb.1'	4	0.163927	1.01832	1.44102	1.17369
Lin9	'uc007dwj.2,uc007dwk.2,uc007dwl.2,uc007dwm.2,uc007dwn.1,uc007dwo.1,uc011wxp.1'	3	-0.11469	1.22047	1.8253	1.54009
Tuba8	'uc009dof.1'	4	0.235857	1.0719	1.69763	0.742898
Nae1	'uc009nas.2'	4	0.380552	1.22827	1.63454	1.11384
Tmem183a	'uc007crq.1,uc007crr.1,uc007crs.1'	3	0.601182	1.07949	1.63999	1.25664
Als2	'uc007bdl.2,uc007bdm.2,uc007bdn.2,uc011wlp.1'	4	0.304356	0.72356	2.32989	1.21454
Tst	'uc007wpd.1'	3	0.558741	0.841561	1.53695	0.827178
Timm44	'uc009ktq.2,uc009ktr.1'	2	0.44557	0.665351	2.04796	0.864325
Tmem199	'uc007kjn.1'	2	0.759867	0.775443	1.33155	1.18408
Rrp36	'uc008ctu.1,uc008ctv.1'	3	0.666776	0.725027	1.94039	1.57631
Hist1h1a	'uc007puz.1'	4	0.253763	0.744922	2.95468	2.9321
Apool	'uc009udf.1,uc009udg.1,uc009udh.1'	2	0.710241	0.810186	1.21022	1.08523
Slc22a3	'uc008aku.1'	2	0.728341	0.902592	1.49129	1.27645
Zfp41	'uc007wgx.1,uc007wgy.1'	3	0.455458	0.88784	1.28223	1.22657
Pfdn1	'uc008enk.1'	3	0.584901	0.843329	1.83024	0.966193
Brip1	'uc007ksf.2,uc011ybr.1'	6	0.100457	0.426614	3.27813	1.69133
Tpm2	'uc008sqb.1,uc008sqc.1,uc008sqd.1'	4	-0.203307	0.853842	1.5738	0.754933
Ccp110	'uc009jkj.1,uc009jkk.1,uc009jkl.1'	4	0.150755	0.879613	1.88647	1.00639
M6pr	'uc009dow.1'	2	0.344329	0.806021	1.48429	0.998909
Rbm12	'uc008nmh.1,uc008nmi.1'	3	0.782863	0.8864	1.54348	1.36321
Zfp410	'uc007oet.1,uc007oeu.1,uc007oev.1,uc007oew.1,uc007oex.1,uc007oey.1,uc011yow.1'	3	1.09666	0.22851	1.49915	1.39629
Hist1h2ae	'uc007pud.1'	6	-0.160455	0.223213	4.53941	4.21597
Rbm8a	'uc008qnk.2,uc008qnl.2'	2	0.576371	0.765384	1.87996	1.52312
Tox4	'uc007toz.2,uc007tpa.2'	3	0.705933	0.706013	1.79691	1.54609
G3bp2	'uc008ycg.1,uc008ych.1,uc008yci.1,uc008ycj.1,uc008yck.1'	2	0.6753	0.780062	1.52291	1.14453
Trappc2l	'uc009ntj.2'	3	0.386928	0.619232	1.73114	0.804256
Papola	'uc007oyv.1,uc007oyw.1,uc007oyx.1,uc007oyy.1,uc007oyz.2,uc011yrm.1'	2	0.733095	1.09636	1.26614	1.10355
Rabl5	'uc009abc.1'	2	0.206598	0.691559	1.92139	1.00045
Zw10	'uc009piu.1,uc009piv.1,uc012gss.1'	4	0.260728	0.957261	2.25579	1.94619
Med18	'uc008vbi.2'	2	0.794553	0.468093	2.99083	0.707533
Ino80e	'uc009jtc.1,uc009jtd.1,uc009jte.1'	2	0.19214	0.987948	1.70515	1.42859
Cdk2ap2	'uc008fym.1'	2	1.0719	0.74648	1.77382	1.18216
Alkbh7	'uc008ddn.2,uc012avz.1'	3	0.197551	0.787662	1.46298	0.449785
Rpl31	'uc007ate.2,uc007atf.2'	2	0.70321	0.926233	1.02064	0.813356
Traip	'uc009rnn.1'	3	-0.0463622	0.493925	2.6812	2.62
Pinx1	'uc007uhx.2'	2	0.78105	0.908173	1.33066	0.762625
Rnmtl1	'uc007kfm.2,uc007kfn.2'	2	0.349319	0.627807	1.7256	0.817693
S1pr3	'uc007qmf.2'	2	0.733124	0.839589	1.60505	0.973104
B230120H23Rik	'uc008kbs.2,uc008kbt.2,uc008kbu.2,uc008kbv.2'	3	0.370008	0.78989	1.90701	1.24557
Uxt	'uc009sue.1,uc009suf.1'	4	0.769052	0.743717	1.99907	1.73504
Ccdc43	'uc007lsg.1,uc007lsh.1'	3	0.667942	0.714057	2.02886	1.26603
Mms19	'uc008hmv.1,uc008hmw.1,uc008hmx.1,uc008hmy.1'	2	0.466846	0.615777	1.81235	1.77445
Atm	'uc009pmd.2,uc009pme.2,uc012gtj.1'	2	0.444815	0.77875	1.62379	0.848079
Klhl23	'uc008jys.2'	3	0.793301	0.990807	1.14358	1.01939
Rmnd1	'uc007ehc.2,uc007ehd.2,uc007ehe.1,uc011wzt.1'	4	0.397011	1.02485	1.35346	1.09735
Pot1a	'uc009bce.1,uc009bcf.1,uc009bcg.1'	3	0.299038	0.767659	2.05031	1.31517
2014-09-09	'uc007mnd.2,uc007mne.2,uc007mnf.2,uc007mng.2'	2	0.45891	0.826032	1.34146	0.896713
Bnip1	'uc008bem.2,uc008ben.2'	2	0.48301	0.820534	1.70058	1.19444
Alg6	'uc008tuw.1'	3	0.748568	0.756403	1.74752	0.538862
E2f4	'uc009ncl.1'	3	0.352546	0.89337	1.38728	1.15925
Ppp4r1	'uc008dgj.2,uc008dgk.2,uc012awh.1'	2	0.435756	1.09628	1.60098	1.32062
Dpp3	'uc008gbo.2,uc008gbq.1'	3	0.338255	0.936316	1.23752	1.12397
Klhdc4	'uc009nsb.2'	4	0.970054	0.818143	1.69925	1.67102
Steap3	'uc007cji.1,uc007cjj.1'	5	0.516008	0.877381	1.44334	1.02195
Mapre2	'uc008egd.1,uc008ege.2,uc008egf.2,uc008egg.1,uc012bah.1'	2	-0.0433227	0.94677	1.29325	0.828528
Mut	'uc008coo.2'	2	0.0613039	0.706665	1.61613	1.12773
Tyw1	'uc008zul.2,uc012eeb.1'	2	0.119249	0.786179	1.37406	0.629072
Fam69a	'uc008yni.2'	2	-0.10569	0.968739	1.61675	0.888292
Sap30bp	'uc007mjd.1'	2	0.140943	1.0007	1.84271	1.3821
Lmnb2	'uc007gfj.1,uc007gfk.1'	6	0.793358	0.714788	1.57495	1.4932
Tube1	'uc007evt.1,uc007evu.1,uc007evv.1,uc007evw.1'	6	0.176228	0.581846	2.26217	1.71043
Ccdc135	'uc009mxr.1,uc009mxs.1'	3	0.471505	0.566375	1.14441	0.628675
Pds5a	'uc008xnw.1,uc008xnx.1,uc008xny.1'	2	-0.0706439	0.837905	1.36448	0.760312
Immp2l	'uc007nll.1,uc007nlm.1'	2	0.569596	0.709424	1.35844	0.385462
Bola3	'uc009cnh.1'	3	0.257887	0.77099	1.72499	0.712365
Cbwd1	'uc008haw.2,uc008hax.2'	3	0.22445	0.421615	1.22625	0.722396
Rnf8	'uc008btf.1'	3	0.632525	0.829612	1.46843	0.998256
Chd1l	'uc008qow.1,uc008qox.1'	3	0.613488	0.70399	2.08676	1.50811
Fam92a	'uc008saq.2,uc008sar.2,uc012daq.1'	2	0.809614	0.703745	2.06973	0.904279
Pcid2	'uc009kwv.1,uc012fzt.1'	4	0.403414	0.770689	1.83446	1.74103
Whsc1	'uc008xbj.2,uc008xbl.2,uc008xbm.2,uc012duu.1,uc012duv.1,uc012duw.1'	3	0.105899	0.798209	1.74662	0.847686
Tor1aip2	'uc007dby.2,uc007dca.2,uc007dcb.2,uc011wub.1'	3	0.759905	0.555113	1.33337	0.472373
Ap1m1	'uc009mfp.1'	2	0.684741	0.726789	1.80585	1.35239
Ube2e1	'uc007shu.1'	2	0.00466013	0.824977	1.67975	0.864132
Mrpl51	'uc009dtv.1,uc009dtw.1'	4	0.440631	0.629354	1.86724	1.83277
Fundc2	'uc009tpu.2'	2	0.80886	0.71002	1.77707	1.22591
Cdpf1	'uc007xdl.2,uc011zxo.1,uc011zxp.1'	3	-0.335678	0.982611	1.14469	1.14143
Pla2g4a	'uc007cxt.1'	4	0.627854	0.589758	2.1221	1.4015
Ccdc53	'uc007grg.2,uc007grh.2,uc011xlf.1'	3	-0.344507	0.834331	1.59805	0.830398
Lrrc8c	'uc008ylf.1'	2	0.688585	0.746406	1.25237	0.662999
Gipc1	'uc009mkr.1'	2	0.198131	0.622303	2.00232	0.629438
Dnase2a	'uc009moa.1,uc009mob.1,uc009moc.1'	2	0.035156	0.676528	1.6833	1.51039
Pcbp2	'uc007xvv.2,uc007xvx.2,uc007xvy.2,uc007xvz.2,uc007xwb.3,uc009vat.1,uc012aac.1'	4	0.361681	0.932706	1.45178	0.759132
Cript	'uc008duo.2'	3	0.968797	0.36919	2.34135	1.88603
Exoc6	'uc008hiq.1,uc008hir.1'	2	-0.0483049	0.917925	1.34076	1.29176
Fdxr	'uc007mgy.1'	2	0.29296	0.8871	1.37799	0.617547
Cnot10	'uc009rxq.2,uc009rxr.2,uc009rxs.2,uc009rxt.1,uc009rxu.2,uc009rxv.2,uc009rxw.2,uc012hcc.1'	2	0.323941	0.802032	1.13052	1.0063
Hist1h4i	'uc007psc.1'	5	0.0628888	0.07929	2.79324	1.99066
Tsc2	'uc008awx.1,uc008awy.1,uc008awz.1,uc008axa.1,uc008axb.1,uc008axc.1,uc008axd.1,uc008axe.1,uc008axf.1,uc008axg.1,uc008axh.1,uc012amo.1'	2	0.111918	0.670385	0.931904	0.435794
Cby1	'uc007wuc.1'	4	-0.0067781	0.383768	2.17449	1.80853
Pgm1	'uc008xmi.1'	2	0.749326	0.540431	1.81296	0.887139
Tmem216	'uc008gqb.1,uc008gqc.1'	2	0.480301	0.585358	1.03096	1.00738
Tspan6	'uc009ufa.1'	4	0.0898323	0.879657	1.12223	0.855301
Mrpl35	'uc009chd.2'	4	0.941118	0.743791	1.52097	1.44345
Gm561	'uc008mrn.1'	2	0.820649	0.608069	1.05016	0.820762
Fntb	'uc007nyu.1'	4	-0.144116	0.596494	1.85108	1.18163
Selrc1	'uc008uaz.1,uc008uba.1'	3	0.065176	0.627141	1.48528	0.395686
Med15	'uc007yls.1,uc007ylt.1,uc007ylu.1,uc007ylv.1,uc007ylw.1,uc007ylx.1,uc007yly.1'	2	0.653692	0.554734	1.75179	1.45441
Cog2	'uc009nxc.2,uc009nxd.2'	3	0.515079	0.813212	0.899485	0.700775
Cyfip1	'uc009hdj.1,uc009hdk.2,uc009hdl.2,uc009hdm.2,uc009hdn.2,uc009hdo.2'	2	0.204046	0.436603	1.95282	1.35298
Hist1h2ab	'uc007put.1'	6	0.0518718	0.0921791	2.67906	2.29622
Pex19	'uc007dpq.2,uc011wwj.1'	2	0.404517	0.824549	1.33654	0.763588
Vrk2	'uc007igf.2,uc007igg.2,uc007igh.2,uc011xsk.1'	2	0.396779	0.61356	1.67364	1.14811
	'uc007cej.1'	3	0.715192	0.570687	0.798646	0.624843
Cryl1	'uc007ucz.1,uc007uda.1'	3	0.700344	0.713637	1.25515	0.994874
Carhsp1	'uc007yct.1'	4	0.244428	0.543255	1.43044	0.916872
	'uc007amj.2'	3	-0.122905	0.817103	1.45354	1.37973
Rmi1	'uc007qua.2,uc007qub.2,uc007quc.2,uc011zaq.1'	3	0.233418	0.653635	1.25959	0.93262
Dclre1a	'uc008hza.1'	6	0.511145	0.709727	1.36696	0.880042
Smg7	'uc007czn.1,uc007czo.2,uc007czp.2'	2	0.189454	0.904443	0.92037	0.818407
Rab1b	'uc008gcf.1'	2	-0.0169223	0.768988	1.50726	1.03982
Cdk6	'uc008wgu.1,uc008wgv.1'	5	0.622354	0.947301	0.948304	0.883983
Top1mt	'uc007whb.1,uc011zum.1'	4	0.665803	0.644797	1.73626	0.672954
Men1	'uc008gib.2,uc008gic.2,uc008gid.2,uc012bhl.1'	3	0.249175	0.799811	1.44741	1.11051
Fam82a2	'uc008lte.2'	2	0.503504	0.696419	1.6603	0.689897
Gtpbp10	'uc008wis.1'	3	0.665514	0.619539	1.24796	0.939221
Ints10	'uc009lwj.1,uc009lwk.1,uc009lwl.1,uc009lwm.1,uc009lwn.1,uc009lwo.1'	3	0.444234	0.368825	1.80397	1.3324
Dgcr8	'uc007yne.1,uc007ynf.1,uc007yng.1,uc007ynh.1,uc012acc.1,uc012acd.1'	4	0.695973	0.539746	1.6832	1.06627
Ccdc6	'uc011xfv.1'	2	0.0759309	0.756651	1.21779	1.00396
Cnn3	'uc008rdy.1,uc012cwy.1'	3	0.212849	0.897769	1.28279	0.97812
Ecsit	'uc009ons.1,uc009ont.1,uc009onu.1'	4	0.608453	0.632494	1.02478	0.869668
Hdac6	'uc009snh.2,uc009sni.2,uc009snj.2,uc012hen.1'	2	0.685745	0.581717	1.42758	1.14888
Ttc37	'uc007rgk.1,uc007rgl.1'	2	0.706826	0.808352	1.10581	0.883917
Tfam	'uc007fol.1,uc007fom.1,uc007fon.1'	2	0.833613	0.59251	1.66409	1.16049
Dym	'uc008fpz.1,uc008fqa.1,uc008fqb.1'	2	0.247597	0.634169	1.42298	1.13061
Usp8	'uc008mea.1,uc008meb.1,uc008mec.1,uc012cdj.1'	2	-0.575167	0.468382	1.64495	0.74138
Mmgt1	'uc009tgj.1'	4	0.465715	0.429567	1.68517	1.04983
Gpr89	'uc008qol.1,uc008qom.1'	2	0.108482	0.861604	0.993545	0.948473
Bnip3	'uc009kfg.1'	2	0.355191	0.271186	0.723093	0.359492
Metap1	'uc008rnl.1,uc008rnm.1'	2	0.2225	0.568855	1.88841	1.026
Gmds	'uc007pzq.1,uc007pzr.1'	4	-0.13627	0.677813	1.27205	1.22346
Mlf2	'uc009dso.2,uc009dsp.2,uc009dsq.2'	3	0.84632	0.444837	1.83566	1.50584
Ipp	'uc008ugp.1'	4	0.575308	0.655364	1.19325	0.410902
Fam45a	'uc008ica.2,uc008icb.2,uc012boh.1'	3	0.412674	0.458594	0.917581	0.847902
Gemin5	'uc007jal.2,uc007jam.2,uc007jan.2,uc007jao.2,uc011xvd.1,uc011xve.1'	2	0.317102	0.691672	1.3533	1.03727
Stard3nl	'uc007ppa.1,uc007ppb.1,uc007ppc.1'	2	-0.353144	0.523946	1.36991	0.780696
Tmem167	'uc007rjo.2'	3	0.534608	0.837067	1.296	1.16583
Ift140	'uc008azm.2,uc008azn.1,uc008azo.2,uc012amw.1'	2	0.161262	0.731622	1.21326	0.829656
Wdr31	'uc008tet.1,uc008teu.1,uc008tev.1'	5	0.122956	0.571943	1.21205	0.906733
Pradc1	'uc009cpr.2,uc009cps.2,uc009cpt.1,uc012eof.1'	3	0.750368	0.299544	1.63977	1.59457
Ikbkb	'uc009ldm.2,uc009ldn.2,uc009ldo.2,uc009ldp.2,uc009ldq.1,uc009lds.2,uc009ldt.2'	2	0.0480233	0.397714	1.60955	1.37157
Ccdc127	'uc007rfb.2,uc007rfc.2,uc007rfd.2'	2	0.397547	0.484462	1.79555	0.944809
Tomm40l	'uc007dni.1,uc007dnj.1'	2	0.645305	0.683191	1.30058	0.982552
Chtop	'uc008qcn.1,uc008qco.1,uc008qcp.1,uc008qcq.1,uc008qcr.1,uc008qcs.1'	3	0.471758	0.354123	1.60055	1.39772
Scfd1	'uc007nmo.1,uc007nmp.1,uc007nmq.1'	2	0.525558	0.396227	1.11197	0.734657
	'uc007zwt.2,uc007zwu.2'	3	0.481714	0.522572	1.55047	1.54118
Smchd1	'uc008dmh.1,uc008dmi.1,uc008dmj.1'	2	0.0752412	0.502324	1.26931	1.08677
Fam120a	'uc007qio.1'	3	0.152352	0.609196	1.27893	1.06015
Rpp38	'uc008ids.2'	2	0.456375	0.891675	0.959451	0.37766
Tomm34	'uc008ntr.1,uc008nts.1'	2	0.110715	0.522886	1.22468	1.06297
Preb	'uc008wwr.2,uc012dui.1'	2	0.908009	0.909478	1.08042	0.775693
Med29	'uc009fyt.2'	3	0.189012	0.501879	1.08042	0.685879
Ppp1r15b	'uc007cps.2,uc007cpt.2'	3	0.585861	0.554129	1.48116	1.2238
Rpusd1	'uc008bbl.1,uc008bbm.1'	3	0.128869	0.702365	1.30398	0.520654
Mapk6	'uc009qsd.1,uc009qse.1,uc009qsf.1'	3	0.802361	0.656279	1.50676	1.00356
Ahsa2	'uc007ifb.1,uc007ifc.1'	3	0.655977	0.652867	1.50198	1.04292
Prl14l	'uc008wzy.2'	3	0.622309	0.383527	1.3739	1.02086
Exoc4	'uc009bgq.1,uc009bgr.1,uc009bgs.1,uc009bgt.1'	2	0.244476	0.37774	1.21641	1.193
Vti1a	'uc008hxv.1,uc008hxw.1,uc008hxx.1,uc008hxy.1,uc008hxz.1,uc012bno.1'	2	0.562515	0.646577	1.00007	0.701549
Wdr45l	'uc007mvt.2'	2	0.221737	0.517478	1.16547	1.07077
Zfp143	'uc009jew.1,uc009jex.1,uc012fse.1'	4	-0.146389	0.282418	1.46917	1.25626
Obfc1	'uc008hvb.1,uc008hvc.1,uc008hve.1'	2	0.69198	0.572461	1.07569	0.902897
Nosip	'uc009gsx.2,uc009gsy.2'	2	0.412069	0.227457	1.89416	1.45158
Coq5	'uc008zdo.1'	2	-0.403772	0.339568	1.7375	0.599601
Zfp472	'uc008bxv.2'	2	0.0333353	0.391323	1.03669	0.735905
Ttc9c	'uc008gnd.1,uc008gne.1,uc008gnf.1'	2	0.172037	0.566457	1.36584	1.06325
Zswim1	'uc008nwi.1'	3	0.0882624	0.608193	1.2303	1.02051
Pigk	'uc008rtr.1,uc012czn.1,uc012czo.1,uc012czp.1'	3	0.539626	0.176947	1.6937	1.47349
Rab3gap2	'uc007dyu.2,uc007dyv.2,uc007dyw.2,uc007dyx.1'	2	0.508734	0.625586	1.36344	0.884707
Mgmt	'uc009keq.1'	2	0.392805	0.559686	1.51018	0.528748
Ccdc14	'uc007zba.2,uc007zbb.2'	4	-0.0382387	0.592808	1.11897	0.944239
	'uc009ura.2'	3	-0.0689205	0.483584	1.27707	0.648313
Dnase1l1	'uc009tof.2,uc012hkr.1'	2	-0.146011	0.41366	1.09045	0.849942
Smyd3	'uc007dvj.1,uc007dvk.1'	2	0.358437	0.107763	1.79967	0.543918
Rbm28	'uc009bcx.2,uc009bcy.2'	2	0.0985823	0.561625	1.26935	1.26609
Ulbp1	'uc009skf.1,uc012hdu.1'	4	0.935661	0.742751	1.16289	1.064
Fto	'uc009msq.2,uc009msr.2,uc009mss.2,uc009mst.2'	2	0.257718	0.676013	1.21344	1.13965
Spryd3	'uc007xur.2,uc011zzy.1'	3	0.443421	0.767519	0.888336	0.671246
Nr3c1	'uc008esx.1,uc008esy.1,uc008esz.1,uc008eta.1,uc008etb.1,uc012bcg.1'	2	0.0586729	0.751268	1.04808	0.98074
Twistnb	'uc007niu.1'	2	0.712749	0.400246	1.33517	0.957037
Xpot	'uc007hfv.1'	3	0.525051	0.617512	0.879056	0.842698
	'uc008dpj.2,uc012axl.1'	2	0.592768	0.298698	1.03059	1.01729
Psmd9	'uc008znk.1'	3	-0.43571	0.530674	1.13045	0.610099
Galns	'uc012gmg.1,uc012gmh.1,uc012gmi.1'	3	-0.0130088	0.163057	1.13949	0.979425
Ap2b1	'uc007kor.1,uc007kos.1,uc007kot.1,uc007kou.1'	4	0.499566	0.814215	0.999477	0.945367
Pddc1	'uc012fwy.1,uc012fwz.1'	2	-0.0973913	-0.0942108	1.33224	1.21965
Surf1	'uc008iwh.2,uc012bsq.1'	2	-0.0862279	0.73377	1.36785	1.02539
Rgs12	'uc008xdf.2,uc008xdg.2,uc008xdh.1,uc008xdi.1'	3	0.2383	0.0601982	1.69224	1.1243
Tfb1m	'uc008aes.1'	3	0.0352049	0.280237	1.63417	0.992272
Sp3	'uc008kcd.1'	3	-0.0688959	0.296269	1.34038	0.696115
AI597468	'uc007glb.2,uc007glc.2'	4	0.515907	0.647963	1.35869	1.17991
Snf8	'uc007lbb.1,uc007lbc.1'	2	0.146902	0.446481	1.36751	0.950181
Epb4.1l2	'uc007erk.2,uc007erl.2,uc007erm.1,uc007ern.3,uc007erp.1,uc007erq.1,uc007err.1,uc007ers.1,uc007ert.1,uc007eru.2'	3	0.149074	0.323108	1.67101	0.895183
	'uc007cjg.1,uc007cjh.2'	3	0.548104	0.750254	1.33812	1.14016
Ttyh2	'uc007mfm.1,uc011yhf.1'	2	0.522212	0.674638	1.28781	0.763854
Acad8	'uc009opy.1,uc009opz.1'	2	0.216953	0.385689	1.10063	1.05296
Prtn3	'uc007gah.1,uc011xie.1'	2	-0.463924	0.438092	1.33699	0.668885
Cbll1	'uc007nhl.1,uc007nhm.1,uc007nhn.1'	3	-0.0127304	0.54777	0.361478	1.07158
Zmat5	'uc007hvc.1,uc007hvd.1'	2	1.03421	0.301379	0.715149	1.16008
B9d2	'uc009fto.1,uc009ftp.1'	3	1.75023	1.9044	2.53277	2.6647
Mphosph10	'uc009hgg.1'	2	1.15296	1.41491	2.05709	2.28656
Rabif	'uc007csc.1'	2	1.05193	0.81868	0.0517597	1.09601
Cks1b	'uc008pzl.1'	6	3.39637	5.25751	7.30501	7.54311
Cks2	'uc007qmh.2,uc007qmi.2'	6	1.07315	2.30272	4.44053	6.8988
Kpna2	'uc007lzz.1,uc007maa.1'	6	1.7502	3.2269	5.19823	7.07222
Tufm	'uc009jro.2,uc009jrp.2,uc009jrq.2'	4	1.10251	1.78912	2.22361	2.99565
Ddx39	'uc009mla.2,uc009mlb.2'	6	2.37567	3.69973	3.44565	4.54711
Dap	'uc007vkc.2'	3	1.21487	0.721084	1.75831	3.4924
Smc2	'uc008swj.1,uc008swk.1,uc008swl.1,uc012def.1'	6	1.79505	4.32415	5.74165	5.77234
Srp68	'uc007mkq.1'	2	1.38952	1.81897	2.24151	2.54545
Brix1	'uc007vgg.1'	2	1.88316	2.24579	2.00199	2.74199
Fibp	'uc008gde.1,uc008gdf.1,uc008gdg.1,uc008gdh.1,uc008gdi.1,uc008gdj.1'	3	1.30362	1.0321	-0.0906106	1.48346
Man2b1	'uc009mpk.1'	2	1.19764	1.78638	1.55569	2.14638
Cse1l	'uc008nys.2,uc008nyt.1,uc012cjl.1'	6	1.9747	2.18948	2.78531	3.02303
Hn1	'uc007mhv.1'	5	2.50198	3.15957	3.6065	4.53712
Zfp330	'uc009mjo.1,uc009mjp.1'	4	1.31626	2.17473	1.82423	2.52434
Ssna1	'uc008irb.1,uc008irc.1'	5	1.83111	2.35771	3.13335	3.96617
	'uc007siv.1'	4	0.879486	1.56214	2.42943	2.63264
Hmgb2	'uc009lsx.2'	6	2.99483	3.58674	4.92327	5.82752
Nsmce1	'uc009jqa.2'	5	2.22472	3.13162	3.56172	3.61974
Ndufa1	'uc009syi.1'	5	2.00115	2.02911	3.09391	3.4841
	'uc008pup.1'	2	0.91769	0.614265	-0.02262	1.39582
Mrpl30	'uc007asj.1'	3	2.12396	1.48071	1.17922	2.73203
Anp32e	'uc008qlu.2,uc008qlv.2'	6	1.89677	2.42194	3.41045	3.96626
Bcas2	'uc008qsu.1,uc012cvd.1'	4	1.45346	1.55101	1.92206	2.31489
H2-Ke2	'uc008cah.1,uc012apn.1'	2	1.65889	2.56095	2.9773	3.07273
Polr1d	'uc009anu.1,uc009anv.1'	3	1.58581	1.81582	1.94808	2.24134
A430005L14Rik	'uc008wau.2,uc012dqe.1'	5	1.41911	1.3671	1.78411	2.26858
Mir3112	'uc009ufi.1,uc009ufj.1,uc009ufk.1,uc012hoh.1,uc012hoi.1'	3	1.03231	1.96975	2.12682	2.14923
Dynlt1a	'uc008agl.2,uc008agm.2'	4	1.86293	2.47277	2.65516	2.80574
Hmgb3	'uc009tkb.1,uc009tkc.1,uc009tkd.1'	5	1.66052	2.45872	3.06766	3.30424
Slirp	'uc007ojd.2,uc007oje.2'	3	1.82389	2.02317	2.98389	2.99069
Ppp1ca	'uc008fzg.1'	2	1.09534	1.33272	1.62173	1.71306
Trnt1	'uc009dcy.1,uc009dcz.1,uc012epy.1'	2	1.55496	1.58089	1.97168	2.09969
Rars	'uc007ilh.2'	2	1.69757	1.46144	1.16637	1.86095
Psmd6	'uc007sgj.1'	5	2.48373	2.39544	2.47002	2.8168
Echs1	'uc009kgx.1,uc009kgy.1,uc009kgz.1'	2	1.34619	1.52495	1.88648	2.14894
S100a13	'uc008qcu.1'	3	0.377239	1.32165	1.46567	1.83001
Eef1e1	'uc007qdw.1,uc007qdx.1'	2	1.13857	1.18758	1.51824	1.69801
Pak1ip1	'uc007qeq.2,uc007qer.2,uc007qes.2'	3	1.3893	1.09147	2.68765	2.85602
Th1l	'uc008ofc.1,uc012ckx.1'	5	1.62837	2.43936	3.31064	3.44391
Sec11a	'uc009ibn.1,uc009ibo.1'	3	1.40827	0.872994	1.75901	1.92094
Ufc1	'uc007dnw.1'	2	1.20141	0.638751	0.109725	1.60251
Spcs1	'uc007swe.2,uc011zic.1'	2	1.57389	0.849577	1.78136	1.78579
Gtpbp4	'uc007pkp.1,uc007pkq.1'	3	1.54269	1.65366	1.68094	1.72607
Ndufc2	'uc009ijd.2'	3	1.90441	2.11818	2.35924	2.49244
Hmgn2	'uc008vdq.1,uc008vdr.1'	6	1.37007	1.57212	2.0198	2.32853
Psmb7	'uc008jnp.1,uc008jnq.1'	4	1.12934	1.98749	2.43916	2.82007
Cyfip2	'uc007iob.1,uc007ioc.1,uc007iod.1,uc011xtl.1'	2	1.15058	0.79811	0.846742	1.58024
Polr2c	'uc009mxe.2'	5	1.13108	1.37133	2.38982	2.77475
Nup210	'uc009cxt.1,uc009cxu.2,uc012epb.1'	5	1.62847	2.30561	2.16072	2.45862
Pmf1	'uc008pva.1,uc008pvb.1'	6	2.14474	2.95068	4.46986	4.85831
Slc39a11	'uc007mek.2,uc007mel.2,uc007mem.2,uc007men.2,uc007meo.1'	3	1.03853	1.12085	0.589685	1.21922
As3mt	'uc008huc.1,uc008hud.1'	2	1.50065	1.14278	1.2028	1.63618
Pik3cg	'uc007nia.1,uc007nib.2,uc007nic.2,uc011ylh.1'	3	1.14411	0.438854	0.439677	2.74938
Higd2a	'uc007qol.1'	2	1.33965	0.845022	2.12962	2.22158
Dnajc19	'uc008oxm.1,uc008oxo.1,uc008oxp.1'	3	1.40831	1.43182	2.46246	2.51619
Lsm4	'uc012gfc.1,uc012gfd.1'	4	1.49478	1.59176	2.43618	3.12668
	'uc008kiv.1,uc008kiw.1'	6	2.42822	2.84574	4.83049	4.83931
Reep5	'uc008eki.2'	3	1.51889	1.69605	2.0169	2.33298
Kpna3	'uc007ufw.2'	3	1.101	1.60342	1.73622	2.09173
SNORD93	'uc008wql.1,uc008wqm.1'	6	1.69095	2.16571	2.72884	2.8119
Dcps	'uc009osp.1,uc012gqd.1'	4	1.49772	1.54693	2.66631	2.84237
Lgals1	'uc007wrv.1'	2	1.30164	1.70836	2.14309	2.40377
Mrps14	'uc007def.1'	2	1.38723	1.54208	1.62605	1.84541
Dnttip2	'uc008rep.1'	2	0.882578	1.02648	1.68353	2.03448
Gabpb1	'uc008mds.1,uc008mdt.1,uc008mdu.1,uc008mdv.1,uc008mdw.1,uc008mdx.1,uc008mdy.1,uc008mdz.1,uc012cdh.1,uc012cdi.1'	4	1.52235	0.629872	2.13275	2.34035
Atp5k	'uc008yoa.1,uc008yob.1'	6	1.82358	3.35402	3.35831	3.38781
Pin1	'uc009ojd.1'	5	1.34212	1.37259	2.11932	2.28718
Gtf2a2	'uc009qnp.1,uc009qnq.1,uc009qnr.1,uc009qns.1'	4	1.53524	1.86662	2.60599	2.95712
Bloc1s2a	'uc008hpl.2,uc012bmf.1'	2	1.33848	0.781373	1.99275	2.30062
Nucks1	'uc007cnx.2,uc007cny.2'	6	1.20071	2.14758	2.92766	4.0156
Taf9	'uc007rrf.2,uc007rrh.1,uc007rri.1'	3	1.42778	2.43882	2.19871	2.88758
Tma7	'uc009rrw.1'	2	1.10986	1.81787	1.66684	1.8212
	'uc009uat.1,uc009uau.1'	5	1.63997	2.96654	3.22829	3.25389
	'uc007hxv.1'	3	1.21636	2.0889	2.59888	3.77007
Dtwd1	'uc008mdk.2'	2	1.35226	1.13938	1.07899	1.63256
Lamtor2	'uc008pvo.1,uc008pvp.1'	2	1.5588	1.16475	1.39448	2.08719
Wdr61	'uc009prm.1,uc009prn.1,uc009pro.1'	4	1.19368	2.05512	2.33875	2.58214
Cops5	'uc007ahe.1,uc007ahf.1'	3	1.46027	1.69111	2.41481	3.19958
Actr3	'uc007cke.1,uc007ckf.1'	4	1.42693	1.89948	2.10064	2.34159
Ndufa5	'uc009bbs.1'	5	1.94319	2.46427	2.6489	2.80302
Psmb2	'uc008utq.2,uc008utr.2'	3	1.38011	1.63681	1.95289	2.01087
Cpsf6	'uc007hdd.2,uc007hdf.2,uc007hdg.2'	4	1.54477	0.997882	1.99705	2.11196
	'uc009qys.1'	2	1.53312	2.09383	1.95673	2.43824
Rad9	'uc008fzh.1,uc008fzi.1'	4	1.40214	0.991444	2.28257	2.44267
Swi5	'uc008jet.2,uc008jeu.2,uc012bts.1'	3	1.43027	1.81173	1.95483	2.18606
	'uc008etp.1'	2	1.39385	1.6152	0.776236	1.96365
Lbr	'uc007dxn.2,uc007dxo.2'	6	1.67004	2.12837	2.87833	3.02511
	'uc007hyp.2,uc007hyq.2'	6	1.21336	1.8555	3.91734	4.2569
Rnf4	'uc008xcc.1,uc008xcd.1,uc008xce.1,uc008xcf.1'	3	1.21977	1.7629	1.9933	2.0157
	'uc009bki.1'	6	1.55282	2.67824	3.16588	3.18739
Psmc1	'uc007osm.1,uc007osn.1'	4	0.775827	1.13727	1.88198	2.47188
Scamp4	'uc007gdy.1,uc007gdz.1'	2	1.5436	1.13247	1.79862	1.89907
	'uc008nlo.2,uc008nlp.2,uc012chf.1'	2	1.08861	1.09931	0.15655	1.83006
Urod	'uc008uhr.1,uc008uhs.1'	2	0.780072	1.25603	1.04941	1.5575
Pnpt1	'uc007igp.1,uc011xso.1'	3	1.35359	1.5137	1.48683	1.84543
Dars	'uc007clp.2,uc007clr.2,uc011wrd.1'	3	0.979505	1.90354	1.74715	1.99246
Wdr1	'uc008xgs.1,uc008xgt.1'	3	1.56918	1.64826	1.46167	1.86827
Tmpo	'uc007gtp.1,uc007gtq.1,uc007gtr.1,uc007gts.1,uc007gtt.1,uc007gtu.1,uc007gtv.1,uc007gtw.1'	5	1.33762	1.8618	2.62752	3.24135
Acsl5	'uc008hxp.1'	5	1.41842	2.31028	2.37128	3.69816
	'uc009eiq.1'	3	1.36917	1.46457	1.81092	2.12604
Sec11c	'uc008ffh.1,uc008ffi.1'	3	1.27052	1.32505	2.17007	2.60937
Top2a	'uc007lic.1,uc007lid.1'	6	1.54528	4.65806	7.81363	7.94651
Ndufb5	'uc008owq.1'	3	1.27717	1.94863	2.47287	3.09883
Wdr55	'uc008eol.1'	2	0.986391	0.775363	1.59979	1.89966
Dld	'uc007nhg.2'	2	1.15464	2.0886	1.56583	2.16184
Psmg3	'uc009ahg.1,uc009ahh.1'	4	1.49267	1.41924	2.57028	2.7715
Samm50	'uc007xbx.1'	3	1.22311	1.78479	1.22223	2.13963
Arl1	'uc007grw.1'	3	1.42532	1.82529	1.60628	2.44611
Commd1	'uc007iek.1,uc007iel.1'	4	0.705778	2.42912	2.89395	2.97872
Srp19	'uc008ekg.2,uc008ekh.2'	3	1.15106	1.63688	2.46197	2.74087
Rab8a	'uc009mfj.1,uc009mfk.1'	2	1.30831	1.07227	1.72257	1.80413
Gnpat	'uc009nxr.1,uc009nxu.2,uc009nxv.2'	2	1.21503	1.05576	1.2089	1.54221
Tomm22	'uc007wud.1'	2	0.756231	1.24642	2.42701	2.58325
Msra	'uc007uig.1,uc007uih.1,uc007uii.1,uc007uij.1,uc007uik.1'	2	1.1428	1.77107	2.57795	2.96549
Utp15	'uc007rom.1'	4	0.653644	1.52937	1.59683	1.88849
Eif2s3x	'uc009ttc.1,uc009ttd.1'	4	0.950178	1.44655	2.66347	2.77396
	'uc007pnl.1'	3	1.09909	1.61289	1.93714	1.97187
Sdhd	'uc009pjv.2'	4	0.981454	2.17274	2.44403	2.47747
Ier3ip1	'uc008fqr.2'	4	1.16627	1.32686	1.71101	2.30682
Bscl2	'uc008gni.2,uc008gnj.2,uc008gnk.2,uc008gnl.2'	2	1.32897	0.954263	1.18095	2.17749
Pqbp1	'uc009snd.1,uc012hem.1'	2	1.18207	0.667264	1.03412	2.55905
	'uc007jry.1'	4	1.28719	2.23203	2.6176	2.72054
Trmt2b	'uc009ufq.2,uc009ufr.2,uc009ufs.2'	3	1.21824	0.941554	1.87847	1.96376
	'uc007jud.2,uc007jue.2,uc007juf.2,uc007jug.2,uc007juh.2,uc011xxr.1,uc011xxs.1'	3	0.998065	1.61624	1.79295	2.96018
Tssc1	'uc007ngb.2'	5	1.23842	1.19292	1.69858	2.13422
Yipf1	'uc008tzr.1,uc008tzs.1,uc012dic.1'	2	1.08991	1.11169	1.0556	1.39831
Rbl1	'uc008noq.2,uc008nor.2,uc008nos.2'	6	1.27642	2.27409	2.25836	2.4187
Aars	'uc009nlo.1'	6	1.41287	1.60558	1.80808	1.86674
Wdr67	'uc007vss.1,uc007vst.1,uc007vsv.1,uc007vsw.1,uc007vsx.1,uc007vsy.1'	4	1.13932	1.86077	2.56111	2.92921
Mrpl49	'uc008ggq.1,uc008ggr.1'	5	1.42111	1.61354	1.53045	2.32813
Wbp5	'uc009uij.1'	4	1.105	1.53846	1.91183	2.39166
Ppp2r4	'uc008jcn.2'	4	1.43652	1.48511	2.38187	2.51543
Kpnb1	'uc007ldu.1,uc011yds.1'	3	1.1933	1.51691	1.0391	1.63783
Inpp5b	'uc008uqy.1,uc008uqz.1,uc012dkv.1,uc012dkx.1,uc012dky.1'	3	0.580431	1.76132	2.18842	2.5349
Gpn3	'uc008zle.1'	4	0.738098	1.83977	2.21081	2.52154
Nde1	'uc007ygy.2,uc007ygz.2,uc007yha.2,uc007yhb.2'	6	0.787608	1.92491	2.90148	5.17405
Ormdl2	'uc007hoo.2,uc007hop.2,uc011xqj.1'	3	1.17007	1.86452	1.43055	2.89115
Tmed10	'uc007ogy.1,uc007ogz.1'	2	1.19062	1.20829	1.57746	1.77803
Cep250	'uc008nlr.2,uc008nlt.2,uc008nlu.2,uc012chh.1,uc012chi.1,uc012chj.1,uc012chk.1,uc012chl.1,uc012chm.1'	3	1.2984	1.28019	0.787688	1.78156
Xrn2	'uc008msp.1,uc008msq.1,uc008msr.1,uc012cfl.1'	3	0.921711	1.99689	1.58847	2.09198
Hbxip	'uc008qww.2'	3	1.15785	1.81544	1.82129	2.21071
Tacc3	'uc008xba.1,uc008xbb.1,uc008xbc.1,uc008xbd.1'	6	1.0086	3.59774	6.17029	6.97676
Ssr3	'uc008pkn.1,uc008pko.1'	2	1.12253	1.41389	1.58467	1.70702
Snrpb2	'uc008mqb.1'	3	0.921311	1.5201	1.91655	2.29647
Mettl6	'uc007sxq.1,uc007sxr.1,uc007sxs.1'	2	0.86485	1.38866	1.23527	2.13855
Ddx49	'uc009lzu.1,uc009lzv.1,uc012gey.1'	3	1.35603	1.0609	1.23003	1.60524
Isca2	'uc007ofu.2,uc007ofv.1'	3	1.23159	0.770668	1.96447	2.88426
Nudt1	'uc009ahn.1,uc009aho.1'	5	0.749556	2.12009	2.62524	2.69975
Eif2b1	'uc008zqd.1'	3	1.05284	1.86434	1.50442	1.90808
Nars	'uc008fek.2,uc008fel.2'	2	1.26624	1.72544	1.82685	2.1008
Mpc1	'uc008aji.1'	4	0.671158	2.53862	2.59567	2.62755
D17H6S56E-5	'uc008cev.1,uc008cew.1,uc008cex.1'	6	1.34149	1.89685	3.91194	5.01187
Ube2t	'uc007csp.1'	6	1.41481	2.77276	3.01171	3.24896
Dera	'uc009eng.1,uc009enh.1'	3	1.2357	2.64304	2.49312	2.94015
Hmgn5	'uc009ucs.1'	4	0.957586	2.22624	2.76334	3.15668
Nup205	'uc009bii.2,uc009bij.2,uc009bik.2,uc009bil.1,uc009bim.1'	5	0.978077	1.63582	2.55471	2.82021
Noc4l	'uc008yrd.1'	4	0.898685	1.9126	2.07764	2.59121
Emp3	'uc009gxv.2,uc009gxw.2'	2	0.930776	1.50188	1.63387	1.66978
Cyb561d2	'uc009rll.1,uc009rlm.1'	2	1.01865	1.03995	1.1723	2.00694
Thoc6	'uc008ass.1,uc008ast.1'	3	1.11403	1.27993	2.28734	3.16375
Lman1	'uc008ffn.2,uc008ffo.2'	2	1.08211	1.36819	1.35423	1.98761
Eif4e2	'uc007bwj.1,uc007bwk.1,uc007bwl.1,uc007bwm.1,uc007bwn.1'	3	1.26376	1.42261	1.68304	1.87567
Ndufs2	'uc007dnm.1,uc011wvz.1'	4	0.881193	2.06207	2.34523	2.67399
	'uc008gqm.1'	2	1.17462	1.37869	1.19843	2.10623
Agpat6	'uc009leo.2,uc009lep.1,uc009leq.2'	2	1.48675	1.68951	1.69305	1.7648
Srp54a	'uc007noh.1,uc007noi.1,uc007nok.1,uc007nol.1'	3	0.969412	1.56469	1.38381	1.64865
Cab39l	'uc007uek.1,uc007uel.1,uc007uem.1,uc007uen.1,uc011zmu.1'	2	0.221165	0.836632	0.385798	1.32954
Capza1	'uc008quq.2'	2	1.05951	1.25496	1.8733	2.07848
Cnih	'uc007thg.2'	4	0.940933	2.20644	2.56938	2.82023
Gtf3c5	'uc008iys.2,uc008iyt.2,uc012bsz.1'	3	0.453358	1.66829	0.961442	1.88951
Golm1	'uc007quw.1,uc007qux.1'	2	1.03783	0.898669	1.7219	1.86218
Psma3	'uc007ntz.2,uc007nua.2'	2	0.873043	1.30096	1.16056	1.36636
Mad1l1	'uc009ahj.1,uc009ahk.1,uc012ega.1'	3	0.988729	1.01979	2.53125	3.14342
Cops2	'uc008mdb.1,uc008mdc.1,uc008mdd.1,uc012cdd.1'	3	0.811735	1.60206	0.974161	2.22332
Ccdc124	'uc009mby.1'	2	0.859646	1.76402	1.2819	2.75457
Myeov2	'uc007cbq.2,uc011wpj.1'	2	0.775628	1.3626	1.74083	2.43519
Anxa2	'uc009qng.1,uc009qnh.1'	2	1.02028	1.26325	1.9209	2.65634
Foxred1	'uc009ost.1,uc009osu.1,uc009osv.1,uc009osw.1,uc009osx.1,uc012gqf.1'	3	1.1592	1.33491	1.17462	1.77823
Vamp3	'uc008vyj.1'	3	1.15669	1.70884	1.31164	1.97015
Ska2	'uc007kti.1,uc007ktj.1,uc007ktk.1'	5	1.21641	1.27273	1.63675	2.53487
Mad2l1	'uc009cen.1,uc009ceo.1'	6	0.887882	3.26648	6.13961	6.60367
Slc25a19	'uc007mig.1,uc007mih.1'	2	0.958293	0.7849	1.21547	1.35889
Larp7	'uc008rhd.1'	4	1.04097	1.94554	1.92055	2.12148
Chek2	'uc008yrw.1,uc008yrx.1'	5	1.00847	2.21419	2.08654	2.4777
Hsdl1	'uc009npu.2,uc009npv.2'	2	0.950432	1.01438	0.91502	1.57232
Rdx	'uc009plq.2,uc009plr.2,uc009pls.2,uc012gti.1'	3	0.875213	1.71071	0.981288	1.79022
Gemin6	'uc008dqv.1,uc008dqw.1'	5	0.644225	2.21394	1.85349	2.9822
Mrps18c	'uc008yib.1,uc008yic.1'	3	0.822127	2.06219	2.50188	3.02963
Necap2	'uc008vnu.2'	4	1.05553	1.35761	1.60835	1.6191
Tubb4b	'uc008iqs.2'	6	0.819196	2.07122	4.5317	4.63007
Pih1d1	'uc009gtv.1,uc009gtw.1'	5	1.35619	1.36469	2.41019	2.80729
Apip	'uc008lin.2'	4	0.582692	1.84759	1.53217	3.05252
Ewsr1	'uc007hvw.1,uc007hvx.1,uc007hvy.1,uc007hvz.1,uc007hwa.1'	2	0.89823	1.55158	1.58469	2.02959
Mrpl24	'uc008ptd.1,uc008pte.1,uc008ptf.1,uc008ptg.1'	3	0.782545	1.73701	0.756985	1.93029
Atad1	'uc008hfo.1,uc008hfp.1'	3	1.03722	1.15821	1.74833	1.86644
Ncapd2	'uc009dtt.1'	6	0.915759	2.31266	4.5427	6.03988
Mpp1	'uc009tpp.1,uc009tpq.1,uc009tpr.1'	2	1.04547	0.900444	0.135954	1.86653
Polr1a	'uc009cht.2,uc009chu.2,uc009chv.2,uc009chw.1,uc009chx.1'	4	0.892272	1.58793	1.19395	1.79039
Thumpd1	'uc009jlo.1,uc009jlp.1'	2	1.39656	1.23618	1.06496	1.50604
Dclre1b	'uc008qtl.1,uc008qtm.1,uc008qto.1,uc008qtp.1'	4	0.891424	1.51905	1.44346	1.52201
	'uc007xsw.1'	3	1.34332	1.51106	1.28236	2.2154
Elof1	'uc009onw.1,uc009onx.1'	5	1.19062	2.2232	2.69792	3.29727
Tuba1a	'uc007xok.1'	4	0.882738	1.42066	2.49899	2.81088
Tmx1	'uc007ntu.1'	5	0.670467	1.77603	2.07479	2.74102
Ctdspl2	'uc008lzw.1,uc008lzx.1,uc008lzy.1,uc008lzz.1,uc008maa.1'	4	0.865832	1.72274	2.07753	2.3262
Mrpl46	'uc009hxl.1'	2	0.981961	1.99576	2.3123	2.32295
Rnaseh2c	'uc008gdx.1'	5	0.760177	2.2929	2.50608	3.42492
Pdcd10	'uc008pnc.1'	2	0.927651	1.38545	1.48206	1.90908
	'uc007ivn.1,uc007ivo.1'	4	1.18395	0.92174	1.75409	2.18808
Cops6	'uc009aer.1,uc009aes.1,uc009aet.1'	2	1.07867	1.44822	2.03457	2.08486
Rangap1	'uc007wxa.2,uc007wxb.2,uc007wxc.2,uc011zwl.1'	6	0.74931	2.33031	3.30148	4.14159
Tamm41	'uc009dij.1,uc009dik.1'	4	0.968968	1.40938	2.77115	3.0506
Triap1	'uc008zds.1'	2	0.745605	1.15708	1.25003	1.38663
Haus3	'uc008xbv.1,uc008xbw.1'	5	0.755661	2.02493	2.26019	3.72946
Sephs1	'uc008ifb.1,uc008ifc.1'	4	0.988958	1.08684	2.42393	2.6251
Cars	'uc009kpn.1,uc009kpo.1'	3	0.779289	1.88685	0.891975	2.02476
Rbm10	'uc009stf.2,uc009stg.2,uc009sth.2,uc009sti.2,uc009stk.1,uc012hff.1'	3	1.03949	1.37761	1.92615	1.9923
Zmpste24	'uc008uny.1'	3	0.952324	1.30579	1.01558	2.00434
L3mbtl2	'uc007wwu.1,uc007wwv.1,uc011zwk.1'	5	0.825325	1.91221	2.01049	2.33632
[truncated: 708 more rows]
