# Supplementary material for: Single-cell RNA-seq reveals changes in cell cycle and differentiation programs upon aging of hematopoietic stem cells
Source: HighWire-hosted journal article supplement (doi:10.1101/gr.192237.115), 2015-10-01
Supplement: Table_S2.xlsx [file Table_S2.xlsx]

## Sheet: Sheet1
Progression Rank	Estimated phase	cell ID	population
1	G0	1343	'old ST-HSC(rep)'
2	G0	1330	'old ST-HSC(rep)'
3	G0	1208	'old LT-HSC(rep)'
4	G0	1310	'old ST-HSC(rep)'
5	G0	1265	'old ST-HSC(rep)'
6	G0	561	'old LT-HSC'
7	G0	1411	'old ST-HSC(rep)'
8	G0	1180	'old LT-HSC(rep)'
9	G0	1185	'old LT-HSC(rep)'
10	G0	1385	'old ST-HSC(rep)'
11	G0	207	'young ST-HSC'
12	G0	723	'old ST-HSC'
13	G0	1368	'old ST-HSC(rep)'
14	G0	1267	'old ST-HSC(rep)'
15	G0	1279	'old ST-HSC(rep)'
16	G0	22	'young LT-HSC'
17	G0	1270	'old ST-HSC(rep)'
18	G0	1335	'old ST-HSC(rep)'
19	G0	1394	'old ST-HSC(rep)'
20	G0	864	'old ST-HSC'
21	G0	1289	'old ST-HSC(rep)'
22	G0	1288	'old ST-HSC(rep)'
23	G0	1242	'old LT-HSC(rep)'
24	G0	188	'young ST-HSC'
25	G0	1164	'old LT-HSC(rep)'
26	G0	225	'young ST-HSC'
27	G0	596	'old LT-HSC'
28	G0	55	'young LT-HSC'
29	G0	1344	'old ST-HSC(rep)'
30	G0	1158	'old LT-HSC(rep)'
31	G0	1237	'old LT-HSC(rep)'
32	G0	1361	'old ST-HSC(rep)'
33	G0	141	'young LT-HSC'
34	G0	1273	'old ST-HSC(rep)'
35	G0	1311	'old ST-HSC(rep)'
36	G0	475	'young MPP'
37	G0	1362	'old ST-HSC(rep)'
38	G0	1320	'old ST-HSC(rep)'
39	G0	281	'young ST-HSC'
40	G0	1356	'old ST-HSC(rep)'
41	G0	675	'old LT-HSC'
42	G0	1179	'old LT-HSC(rep)'
43	G0	1299	'old ST-HSC(rep)'
44	G0	1334	'old ST-HSC(rep)'
45	G0	1166	'old LT-HSC(rep)'
46	G0	589	'old LT-HSC'
47	G0	1182	'old LT-HSC(rep)'
48	G0	598	'old LT-HSC'
49	G0	1399	'old ST-HSC(rep)'
50	G0	1282	'old ST-HSC(rep)'
51	G0	563	'old LT-HSC'
52	G0	45	'young LT-HSC'
53	G0	1291	'old ST-HSC(rep)'
54	G0	1427	'old ST-HSC(rep)'
55	G0	1367	'old ST-HSC(rep)'
56	G0	1306	'old ST-HSC(rep)'
57	G0	742	'old ST-HSC'
58	G0	84	'young LT-HSC'
59	G0	821	'old ST-HSC'
60	G0	1280	'old ST-HSC(rep)'
61	G0	19	'young LT-HSC'
62	G0	738	'old ST-HSC'
63	G0	611	'old LT-HSC'
64	G0	1339	'old ST-HSC(rep)'
65	G0	1276	'old ST-HSC(rep)'
66	G0	1194	'old LT-HSC(rep)'
67	G0	1333	'old ST-HSC(rep)'
68	G0	1187	'old LT-HSC(rep)'
69	G0	51	'young LT-HSC'
70	G0	209	'young ST-HSC'
71	G0	917	'old MPP'
72	G0	46	'young LT-HSC'
73	G0	1380	'old ST-HSC(rep)'
74	G0	508	'old LT-HSC'
75	G0	1011	'old MPP'
76	G0	797	'old ST-HSC'
77	G0	516	'old LT-HSC'
78	G0	1382	'old ST-HSC(rep)'
79	G0	789	'old ST-HSC'
80	G0	1170	'old LT-HSC(rep)'
81	G0	1268	'old ST-HSC(rep)'
82	G0	682	'old LT-HSC'
83	G0	176	'young ST-HSC'
84	G0	1386	'old ST-HSC(rep)'
85	G0	355	'young MPP'
86	G0	1239	'old LT-HSC(rep)'
87	G0	1350	'old ST-HSC(rep)'
88	G0	1302	'old ST-HSC(rep)'
89	G0	810	'old ST-HSC'
90	G0	1419	'old ST-HSC(rep)'
91	G0	1338	'old ST-HSC(rep)'
92	G0	205	'young ST-HSC'
93	G0	713	'old ST-HSC'
94	G0	936	'old MPP'
95	G0	106	'young LT-HSC'
96	G0	1212	'old LT-HSC(rep)'
97	G0	1342	'old ST-HSC(rep)'
98	G0	1261	'old ST-HSC(rep)'
99	G0	728	'old ST-HSC'
100	G0	1323	'old ST-HSC(rep)'
101	G0	185	'young ST-HSC'
102	G0	1404	'old ST-HSC(rep)'
103	G0	1352	'old ST-HSC(rep)'
104	G0	665	'old LT-HSC'
105	G0	487	'young MPP'
106	G0	1277	'old ST-HSC(rep)'
107	G0	193	'young ST-HSC'
108	G0	524	'old LT-HSC'
109	G0	477	'young MPP'
110	G0	642	'old LT-HSC'
111	G0	1415	'old ST-HSC(rep)'
112	G0	733	'old ST-HSC'
113	G0	796	'old ST-HSC'
114	G0	127	'young LT-HSC'
115	G0	616	'old LT-HSC'
116	G0	30	'young LT-HSC'
117	G0	187	'young ST-HSC'
118	G0	230	'young ST-HSC'
119	G0	1203	'old LT-HSC(rep)'
120	G0	1351	'old ST-HSC(rep)'
121	G0	735	'old ST-HSC'
122	G0	154	'young LT-HSC'
123	G0	618	'old LT-HSC'
124	G0	1221	'old LT-HSC(rep)'
125	G0	701	'old ST-HSC'
126	G0	579	'old LT-HSC'
127	G0	542	'old LT-HSC'
128	G0	1222	'old LT-HSC(rep)'
129	G0	1314	'old ST-HSC(rep)'
130	G0	39	'young LT-HSC'
131	G0	9	'young LT-HSC'
132	G0	527	'old LT-HSC'
133	G0	698	'old ST-HSC'
134	G0	794	'old ST-HSC'
135	G0	1413	'old ST-HSC(rep)'
136	G0	1210	'old LT-HSC(rep)'
137	G0	277	'young ST-HSC'
138	G0	215	'young ST-HSC'
139	G0	1010	'old MPP'
140	G0	1390	'old ST-HSC(rep)'
141	G0	447	'young MPP'
142	G0	732	'old ST-HSC'
143	G0	762	'old ST-HSC'
144	G0	655	'old LT-HSC'
145	G0	863	'old ST-HSC'
146	G0	74	'young LT-HSC'
147	G0	216	'young ST-HSC'
148	G0	814	'old ST-HSC'
149	G0	210	'young ST-HSC'
150	G0	445	'young MPP'
151	G0	52	'young LT-HSC'
152	G0	1364	'old ST-HSC(rep)'
153	G0	1200	'old LT-HSC(rep)'
154	G0	283	'young ST-HSC'
155	G0	708	'old ST-HSC'
156	G0	703	'old ST-HSC'
157	G0	183	'young ST-HSC'
158	G0	830	'old ST-HSC'
159	G0	1272	'old ST-HSC(rep)'
160	G0	1269	'old ST-HSC(rep)'
161	G0	763	'old ST-HSC'
162	G0	1376	'old ST-HSC(rep)'
163	G0	1119	'old LT-HSC(rep)'
164	G0	251	'young ST-HSC'
165	G0	610	'old LT-HSC'
166	G0	479	'young MPP'
167	G0	1294	'old ST-HSC(rep)'
168	G0	998	'old MPP'
169	G0	1037	'old MPP'
170	G0	1305	'old ST-HSC(rep)'
171	G0	130	'young LT-HSC'
172	G0	47	'young LT-HSC'
173	G0	1142	'old LT-HSC(rep)'
174	G0	851	'old ST-HSC'
175	G0	1184	'old LT-HSC(rep)'
176	G0	663	'old LT-HSC'
177	G0	517	'old LT-HSC'
178	G0	199	'young ST-HSC'
179	G0	1249	'old ST-HSC(rep)'
180	G0	1235	'old LT-HSC(rep)'
181	G0	1365	'old ST-HSC(rep)'
182	G0	1253	'old ST-HSC(rep)'
183	G0	1189	'old LT-HSC(rep)'
184	G0	1360	'old ST-HSC(rep)'
185	G0	1197	'old LT-HSC(rep)'
186	G0	513	'old LT-HSC'
187	G0	857	'old ST-HSC'
188	G0	147	'young LT-HSC'
189	G0	1275	'old ST-HSC(rep)'
190	G0	631	'old LT-HSC'
191	G0	1300	'old ST-HSC(rep)'
192	G0	668	'old LT-HSC'
193	G0	1219	'old LT-HSC(rep)'
194	G0	1297	'old ST-HSC(rep)'
195	G0	102	'young LT-HSC'
196	G0	1317	'old ST-HSC(rep)'
197	G0	1161	'old LT-HSC(rep)'
198	G0	418	'young MPP'
199	G0	1308	'old ST-HSC(rep)'
200	G0	712	'old ST-HSC'
201	G0	240	'young ST-HSC'
202	G0	995	'old MPP'
203	G0	751	'old ST-HSC'
204	G0	1416	'old ST-HSC(rep)'
205	G0	615	'old LT-HSC'
206	G0	1174	'old LT-HSC(rep)'
207	G0	226	'young ST-HSC'
208	G0	1226	'old LT-HSC(rep)'
209	G0	434	'young MPP'
210	G0	1156	'old LT-HSC(rep)'
211	G0	529	'old LT-HSC'
212	G0	318	'young ST-HSC'
213	G0	745	'old ST-HSC'
214	G0	549	'old LT-HSC'
215	G0	1025	'old MPP'
216	G0	103	'young LT-HSC'
217	G0	555	'old LT-HSC'
218	G0	593	'old LT-HSC'
219	G0	214	'young ST-HSC'
220	G0	1347	'old ST-HSC(rep)'
221	G0	1303	'old ST-HSC(rep)'
222	G0	557	'old LT-HSC'
223	G0	18	'young LT-HSC'
224	G0	33	'young LT-HSC'
225	G0	564	'old LT-HSC'
226	G0	1195	'old LT-HSC(rep)'
227	G0	620	'old LT-HSC'
228	G0	1250	'old ST-HSC(rep)'
229	G0	861	'old ST-HSC'
230	G0	1286	'old ST-HSC(rep)'
231	G0	310	'young ST-HSC'
232	G0	503	'old LT-HSC'
233	G0	308	'young ST-HSC'
234	G0	809	'old ST-HSC'
235	G0	265	'young ST-HSC'
236	G0	1336	'old ST-HSC(rep)'
237	G0	659	'old LT-HSC'
238	G0	532	'old LT-HSC'
239	G0	50	'young LT-HSC'
240	G0	512	'old LT-HSC'
241	G0	519	'old LT-HSC'
242	G0	98	'young LT-HSC'
243	G0	1353	'old ST-HSC(rep)'
244	G0	184	'young ST-HSC'
245	G0	1417	'old ST-HSC(rep)'
246	G0	748	'old ST-HSC'
247	G0	1318	'old ST-HSC(rep)'
248	G0	26	'young LT-HSC'
249	G0	320	'young ST-HSC'
250	G0	100	'young LT-HSC'
251	G0	638	'old LT-HSC'
252	G0	309	'young ST-HSC'
253	G0	681	'old LT-HSC'
254	G0	146	'young LT-HSC'
255	G0	134	'young LT-HSC'
256	G0	196	'young ST-HSC'
257	G0	501	'old LT-HSC'
258	G0	856	'old ST-HSC'
259	G0	1391	'old ST-HSC(rep)'
260	G0	1296	'old ST-HSC(rep)'
261	G0	291	'young ST-HSC'
262	G0	1260	'old ST-HSC(rep)'
263	G0	378	'young MPP'
264	G0	1155	'old LT-HSC(rep)'
265	G0	1398	'old ST-HSC(rep)'
266	G0	7	'young LT-HSC'
267	G0	234	'young ST-HSC'
268	G0	168	'young ST-HSC'
269	G0	955	'old MPP'
270	G0	237	'young ST-HSC'
271	G0	94	'young LT-HSC'
272	G0	1421	'old ST-HSC(rep)'
273	G0	1139	'old LT-HSC(rep)'
274	G0	1290	'old ST-HSC(rep)'
275	G0	722	'old ST-HSC'
276	G0	125	'young LT-HSC'
277	G0	1217	'old LT-HSC(rep)'
278	G0	122	'young LT-HSC'
279	G0	855	'old ST-HSC'
280	G0	786	'old ST-HSC'
281	G0	893	'old MPP'
282	G0	304	'young ST-HSC'
283	G0	535	'old LT-HSC'
284	G0	1262	'old ST-HSC(rep)'
285	G0	646	'old LT-HSC'
286	G0	507	'old LT-HSC'
287	G0	680	'old LT-HSC'
288	G0	1295	'old ST-HSC(rep)'
289	G0	868	'old ST-HSC'
290	G0	93	'young LT-HSC'
291	G0	1202	'old LT-HSC(rep)'
292	G0	871	'old ST-HSC'
293	G0	197	'young ST-HSC'
294	G0	641	'old LT-HSC'
295	G0	1154	'old LT-HSC(rep)'
296	G0	730	'old ST-HSC'
297	G0	822	'old ST-HSC'
298	G0	48	'young LT-HSC'
299	G0	560	'old LT-HSC'
300	G0	676	'old LT-HSC'
301	G0	128	'young LT-HSC'
302	G0	755	'old ST-HSC'
303	G0	440	'young MPP'
304	G0	843	'old ST-HSC'
305	G0	192	'young ST-HSC'
306	G0	718	'old ST-HSC'
307	G0	714	'old ST-HSC'
308	G0	101	'young LT-HSC'
309	G0	558	'old LT-HSC'
310	G0	1366	'old ST-HSC(rep)'
311	G0	583	'old LT-HSC'
312	G0	711	'old ST-HSC'
313	G0	741	'old ST-HSC'
314	G0	725	'old ST-HSC'
315	G0	300	'young ST-HSC'
316	G0	178	'young ST-HSC'
317	G0	290	'young ST-HSC'
318	G0	1225	'old LT-HSC(rep)'
319	G0	1111	'old LT-HSC(rep)'
320	G0	801	'old ST-HSC'
321	G0	1379	'old ST-HSC(rep)'
322	G0	62	'young LT-HSC'
323	G0	200	'young ST-HSC'
324	G0	608	'old LT-HSC'
325	G0	847	'old ST-HSC'
326	G0	865	'old ST-HSC'
327	G0	1098	'old LT-HSC(rep)'
328	G0	1264	'old ST-HSC(rep)'
329	G0	971	'old MPP'
330	G0	80	'young LT-HSC'
331	G0	649	'old LT-HSC'
332	G0	902	'old MPP'
333	G0	208	'young ST-HSC'
334	G0	116	'young LT-HSC'
335	G0	60	'young LT-HSC'
336	G0	1220	'old LT-HSC(rep)'
337	G0	546	'old LT-HSC'
338	G0	889	'old MPP'
339	G0	1167	'old LT-HSC(rep)'
340	G0	179	'young ST-HSC'
341	G0	1137	'old LT-HSC(rep)'
342	G0	97	'young LT-HSC'
343	G0	533	'old LT-HSC'
344	G0	866	'old ST-HSC'
345	G0	716	'old ST-HSC'
346	G0	8	'young LT-HSC'
347	G0	92	'young LT-HSC'
348	G0	710	'old ST-HSC'
349	G0	108	'young LT-HSC'
350	G0	1370	'old ST-HSC(rep)'
351	G0	1363	'old ST-HSC(rep)'
352	G0	1331	'old ST-HSC(rep)'
353	G0	1244	'old LT-HSC(rep)'
354	G0	299	'young ST-HSC'
355	G0	509	'old LT-HSC'
356	G0	677	'old LT-HSC'
357	G0	566	'old LT-HSC'
358	G0	1107	'old LT-HSC(rep)'
359	G0	1162	'old LT-HSC(rep)'
360	G0	276	'young ST-HSC'
361	G0	217	'young ST-HSC'
362	G0	189	'young ST-HSC'
363	G0	974	'old MPP'
364	G0	329	'young ST-HSC'
365	G0	669	'old LT-HSC'
366	G0	211	'young ST-HSC'
367	G0	774	'old ST-HSC'
368	G0	1405	'old ST-HSC(rep)'
369	G0	575	'old LT-HSC'
370	G0	295	'young ST-HSC'
371	G0	578	'old LT-HSC'
372	G0	600	'old LT-HSC'
373	G0	358	'young MPP'
374	G0	511	'old LT-HSC'
375	G0	12	'young LT-HSC'
376	G0	811	'old ST-HSC'
377	G0	1281	'old ST-HSC(rep)'
378	G0	338	'young MPP'
379	G0	1178	'old LT-HSC(rep)'
380	G0	693	'old ST-HSC'
381	G0	1211	'old LT-HSC(rep)'
382	G0	622	'old LT-HSC'
383	G0	545	'old LT-HSC'
384	G0	888	'old MPP'
385	G0	90	'young LT-HSC'
386	G0	543	'old LT-HSC'
387	G0	1181	'old LT-HSC(rep)'
388	G0	1106	'old LT-HSC(rep)'
389	G0	792	'old ST-HSC'
390	G0	1	'young LT-HSC'
391	G0	795	'old ST-HSC'
392	G0	599	'old LT-HSC'
393	G0	71	'young LT-HSC'
394	G0	1355	'old ST-HSC(rep)'
395	G0	914	'old MPP'
396	G0	1341	'old ST-HSC(rep)'
397	G0	1058	'old MPP'
398	G0	744	'old ST-HSC'
399	G0	910	'old MPP'
400	G0	143	'young LT-HSC'
401	G0	573	'old LT-HSC'
402	G0	1321	'old ST-HSC(rep)'
403	G0	157	'young LT-HSC'
404	G0	53	'young LT-HSC'
405	G0	603	'old LT-HSC'
406	G0	869	'old ST-HSC'
407	G0	695	'old ST-HSC'
408	G0	1190	'old LT-HSC(rep)'
409	G0	14	'young LT-HSC'
410	G0	640	'old LT-HSC'
411	G0	625	'old LT-HSC'
412	G0	255	'young ST-HSC'
413	G0	764	'old ST-HSC'
414	G0	800	'old ST-HSC'
415	G0	785	'old ST-HSC'
416	G0	1345	'old ST-HSC(rep)'
417	G0	850	'old ST-HSC'
418	G0	258	'young ST-HSC'
419	G0	1159	'old LT-HSC(rep)'
420	G0	815	'old ST-HSC'
421	G0	1198	'old LT-HSC(rep)'
422	G0	1424	'old ST-HSC(rep)'
423	G0	352	'young MPP'
424	G0	633	'old LT-HSC'
425	G0	253	'young ST-HSC'
426	G0	1241	'old LT-HSC(rep)'
427	G0	1065	'old LT-HSC(rep)'
428	G0	683	'old ST-HSC'
429	G0	297	'young ST-HSC'
430	G0	550	'old LT-HSC'
431	G0	76	'young LT-HSC'
432	G0	924	'old MPP'
433	G0	592	'old LT-HSC'
434	G0	617	'old LT-HSC'
435	G0	879	'old MPP'
436	G0	43	'young LT-HSC'
437	G0	878	'old MPP'
438	G0	817	'old ST-HSC'
439	G0	244	'young ST-HSC'
440	G0	1392	'old ST-HSC(rep)'
441	G0	104	'young LT-HSC'
442	G0	126	'young LT-HSC'
443	G0	739	'old ST-HSC'
444	G0	624	'old LT-HSC'
445	G0	656	'old LT-HSC'
446	G0	632	'old LT-HSC'
447	G0	415	'young MPP'
448	G0	1051	'old MPP'
449	G0	700	'old ST-HSC'
450	G0	1039	'old MPP'
451	G0	539	'old LT-HSC'
452	G0	213	'young ST-HSC'
453	G0	547	'old LT-HSC'
454	G0	1236	'old LT-HSC(rep)'
455	G0	827	'old ST-HSC'
456	G0	595	'old LT-HSC'
457	G0	966	'old MPP'
458	G0	1108	'old LT-HSC(rep)'
459	G0	312	'young ST-HSC'
460	G0	274	'young ST-HSC'
461	G0	1214	'old LT-HSC(rep)'
462	G0	160	'young LT-HSC'
463	G0	1163	'old LT-HSC(rep)'
464	G0	1329	'old ST-HSC(rep)'
465	G0	621	'old LT-HSC'
466	G0	1140	'old LT-HSC(rep)'
467	G0	40	'young LT-HSC'
468	G0	1079	'old LT-HSC(rep)'
469	G0	678	'old LT-HSC'
470	G0	1070	'old LT-HSC(rep)'
471	G0	1396	'old ST-HSC(rep)'
472	G0	552	'old LT-HSC'
473	G0	982	'old MPP'
474	G0	1328	'old ST-HSC(rep)'
475	G0	706	'old ST-HSC'
476	G0	679	'old LT-HSC'
477	G0	1027	'old MPP'
478	G0	485	'young MPP'
479	G0	773	'old ST-HSC'
480	G0	36	'young LT-HSC'
481	G0	1068	'old LT-HSC(rep)'
482	G0	1259	'old ST-HSC(rep)'
483	G0	1246	'old LT-HSC(rep)'
484	G0	634	'old LT-HSC'
485	G0	1147	'old LT-HSC(rep)'
486	G0	301	'young ST-HSC'
487	G0	587	'old LT-HSC'
488	G0	606	'old LT-HSC'
489	G0	554	'old LT-HSC'
490	G0	1247	'old LT-HSC(rep)'
491	G0	520	'old LT-HSC'
492	G0	594	'old LT-HSC'
493	G0	1095	'old LT-HSC(rep)'
494	G0	798	'old ST-HSC'
495	G0	397	'young MPP'
496	G0	696	'old ST-HSC'
497	G0	771	'old ST-HSC'
498	G0	488	'young MPP'
499	G0	819	'old ST-HSC'
500	G0	770	'old ST-HSC'
501	G0	1124	'old LT-HSC(rep)'
502	G0	870	'old ST-HSC'
503	G0	605	'old LT-HSC'
504	G0	1082	'old LT-HSC(rep)'
505	G0	284	'young ST-HSC'
506	G0	841	'old ST-HSC'
507	G0	685	'old ST-HSC'
508	G0	737	'old ST-HSC'
509	G0	829	'old ST-HSC'
510	G0	206	'young ST-HSC'
511	G0	672	'old LT-HSC'
512	G0	1420	'old ST-HSC(rep)'
513	G0	559	'old LT-HSC'
514	G0	279	'young ST-HSC'
515	G0	119	'young LT-HSC'
516	G0	961	'old MPP'
517	G0	58	'young LT-HSC'
518	G0	1397	'old ST-HSC(rep)'
519	G0	1381	'old ST-HSC(rep)'
520	G0	987	'old MPP'
521	G0	754	'old ST-HSC'
522	G0	964	'old MPP'
523	G0	582	'old LT-HSC'
524	G0	749	'old ST-HSC'
525	G0	1224	'old LT-HSC(rep)'
526	G0	799	'old ST-HSC'
527	G0	85	'young LT-HSC'
528	G0	1094	'old LT-HSC(rep)'
529	G0	377	'young MPP'
530	G0	721	'old ST-HSC'
531	G0	662	'old LT-HSC'
532	G0	271	'young ST-HSC'
533	G0	282	'young ST-HSC'
534	G0	1121	'old LT-HSC(rep)'
535	G0	537	'old LT-HSC'
536	G0	1326	'old ST-HSC(rep)'
537	G0	782	'old ST-HSC'
538	G0	1064	'old LT-HSC(rep)'
539	G0	198	'young ST-HSC'
540	G0	1175	'old LT-HSC(rep)'
541	G0	580	'old LT-HSC'
542	G0	114	'young LT-HSC'
543	G0	645	'old LT-HSC'
544	G0	1100	'old LT-HSC(rep)'
545	G0	1298	'old ST-HSC(rep)'
546	G0	1126	'old LT-HSC(rep)'
547	G0	717	'old ST-HSC'
548	G0	609	'old LT-HSC'
549	G0	892	'old MPP'
550	G0	808	'old ST-HSC'
551	G0	1223	'old LT-HSC(rep)'
552	G0	504	'old LT-HSC'
553	G0	1141	'old LT-HSC(rep)'
554	G0	1201	'old LT-HSC(rep)'
555	G0	1257	'old ST-HSC(rep)'
556	G0	267	'young ST-HSC'
557	G0	73	'young LT-HSC'
558	G0	328	'young ST-HSC'
559	G0	802	'old ST-HSC'
560	G0	2	'young LT-HSC'
561	G0	133	'young LT-HSC'
562	G0	1322	'old ST-HSC(rep)'
563	G0	1069	'old LT-HSC(rep)'
564	G0	768	'old ST-HSC'
565	G0	68	'young LT-HSC'
566	G0	1103	'old LT-HSC(rep)'
567	G0	848	'old ST-HSC'
568	G0	321	'young ST-HSC'
569	G0	699	'old ST-HSC'
570	G0	664	'old LT-HSC'
571	G0	925	'old MPP'
572	G0	1016	'old MPP'
573	G0	724	'old ST-HSC'
574	G0	156	'young LT-HSC'
575	G0	734	'old ST-HSC'
576	G0	536	'old LT-HSC'
577	G0	263	'young ST-HSC'
578	G0	1227	'old LT-HSC(rep)'
579	G0	293	'young ST-HSC'
580	G0	386	'young MPP'
581	G0	1384	'old ST-HSC(rep)'
582	G0	1077	'old LT-HSC(rep)'
583	G0	912	'old MPP'
584	G0	818	'old ST-HSC'
585	G0	474	'young MPP'
586	G0	704	'old ST-HSC'
587	G0	626	'old LT-HSC'
588	G0	643	'old LT-HSC'
589	G0	939	'old MPP'
590	G0	909	'old MPP'
591	G0	219	'young ST-HSC'
592	G0	430	'young MPP'
593	G0	1258	'old ST-HSC(rep)'
594	G0	823	'old ST-HSC'
595	G0	862	'old ST-HSC'
596	G0	1378	'old ST-HSC(rep)'
597	G0	466	'young MPP'
598	G0	1127	'old LT-HSC(rep)'
599	G0	138	'young LT-HSC'
600	G0	840	'old ST-HSC'
601	G0	1138	'old LT-HSC(rep)'
602	G0	248	'young ST-HSC'
603	G0	181	'young ST-HSC'
604	G0	806	'old ST-HSC'
605	G0	42	'young LT-HSC'
606	G0	268	'young ST-HSC'
607	G0	697	'old ST-HSC'
608	G0	1218	'old LT-HSC(rep)'
609	G0	760	'old ST-HSC'
610	G0	330	'young ST-HSC'
611	G0	530	'old LT-HSC'
612	G0	88	'young LT-HSC'
613	G0	1176	'old LT-HSC(rep)'
614	G0	428	'young MPP'
615	G0	660	'old LT-HSC'
616	G0	565	'old LT-HSC'
617	G0	779	'old ST-HSC'
618	G0	648	'old LT-HSC'
619	G0	233	'young ST-HSC'
620	G0	121	'young LT-HSC'
621	G0	753	'old ST-HSC'
622	G0	842	'old ST-HSC'
623	G0	1233	'old LT-HSC(rep)'
624	G0	1324	'old ST-HSC(rep)'
625	G0	1186	'old LT-HSC(rep)'
626	G0	845	'old ST-HSC'
627	G0	1193	'old LT-HSC(rep)'
628	G0	344	'young MPP'
629	G0	1304	'old ST-HSC(rep)'
630	G0	457	'young MPP'
631	G0	113	'young LT-HSC'
632	G0	1209	'old LT-HSC(rep)'
633	G0	1287	'old ST-HSC(rep)'
634	G0	1087	'old LT-HSC(rep)'
635	G0	232	'young ST-HSC'
636	G0	715	'old ST-HSC'
637	G0	144	'young LT-HSC'
638	G0	1093	'old LT-HSC(rep)'
639	G0	1165	'old LT-HSC(rep)'
640	G0	670	'old LT-HSC'
641	G0	781	'old ST-HSC'
642	G0	212	'young ST-HSC'
643	G0	1086	'old LT-HSC(rep)'
644	G0	261	'young ST-HSC'
645	G0	629	'old LT-HSC'
646	G0	521	'old LT-HSC'
647	G0	66	'young LT-HSC'
648	G0	776	'old ST-HSC'
649	G0	1004	'old MPP'
650	G0	726	'old ST-HSC'
651	G0	1076	'old LT-HSC(rep)'
652	G0	392	'young MPP'
653	G0	635	'old LT-HSC'
654	G0	1423	'old ST-HSC(rep)'
655	G0	652	'old LT-HSC'
656	G0	1374	'old ST-HSC(rep)'
657	G0	1266	'old ST-HSC(rep)'
658	G0	67	'young LT-HSC'
659	G0	673	'old LT-HSC'
660	G0	111	'young LT-HSC'
661	G0	1369	'old ST-HSC(rep)'
662	G0	636	'old LT-HSC'
663	G0	236	'young ST-HSC'
664	G0	556	'old LT-HSC'
665	G0	322	'young ST-HSC'
666	G0	852	'old ST-HSC'
667	G0	367	'young MPP'
668	G0	173	'young ST-HSC'
669	G0	1000	'old MPP'
670	G0	285	'young ST-HSC'
671	G0	568	'old LT-HSC'
672	G0	1089	'old LT-HSC(rep)'
673	G0	604	'old LT-HSC'
674	G0	123	'young LT-HSC'
675	G0	853	'old ST-HSC'
676	G0	1072	'old LT-HSC(rep)'
677	G0	969	'old MPP'
678	G0	1283	'old ST-HSC(rep)'
679	G0	223	'young ST-HSC'
680	G0	462	'young MPP'
681	G0	691	'old ST-HSC'
682	G0	120	'young LT-HSC'
683	G0	23	'young LT-HSC'
684	G0	354	'young MPP'
685	G0	155	'young LT-HSC'
686	G0	1114	'old LT-HSC(rep)'
687	G0	548	'old LT-HSC'
688	G0	1110	'old LT-HSC(rep)'
689	G0	1274	'old ST-HSC(rep)'
690	G0	1116	'old LT-HSC(rep)'
691	G0	177	'young ST-HSC'
692	G0	1026	'old MPP'
693	G0	1252	'old ST-HSC(rep)'
694	G0	83	'young LT-HSC'
695	G0	571	'old LT-HSC'
696	G0	229	'young ST-HSC'
697	G0	69	'young LT-HSC'
698	G0	319	'young ST-HSC'
699	G0	761	'old ST-HSC'
700	G0	630	'old LT-HSC'
701	G0	1401	'old ST-HSC(rep)'
702	G0	3	'young LT-HSC'
703	G0	1387	'old ST-HSC(rep)'
704	G0	296	'young ST-HSC'
705	G0	231	'young ST-HSC'
706	G0	1113	'old LT-HSC(rep)'
707	G0	919	'old MPP'
708	G0	374	'young MPP'
709	G0	1319	'old ST-HSC(rep)'
710	G0	1120	'old LT-HSC(rep)'
711	G0	572	'old LT-HSC'
712	G0	767	'old ST-HSC'
713	G0	182	'young ST-HSC'
714	G0	834	'old ST-HSC'
715	G0	298	'young ST-HSC'
716	G0	1238	'old LT-HSC(rep)'
717	G0	235	'young ST-HSC'
718	G0	89	'young LT-HSC'
719	G0	79	'young LT-HSC'
720	G0	944	'old MPP'
721	G0	400	'young MPP'
722	G0	1213	'old LT-HSC(rep)'
723	G0	948	'old MPP'
724	G0	107	'young LT-HSC'
725	G0	63	'young LT-HSC'
726	G0	333	'young MPP'
727	G0	667	'old LT-HSC'
728	G0	884	'old MPP'
729	G0	1243	'old LT-HSC(rep)'
730	G0	1407	'old ST-HSC(rep)'
731	G0	1256	'old ST-HSC(rep)'
732	G0	1153	'old LT-HSC(rep)'
733	G0	1046	'old MPP'
734	G0	29	'young LT-HSC'
735	G0	302	'young ST-HSC'
736	G0	496	'young MPP'
737	G0	484	'young MPP'
738	G0	787	'old ST-HSC'
739	G0	272	'young ST-HSC'
740	G0	1091	'old LT-HSC(rep)'
741	G0	1134	'old LT-HSC(rep)'
742	G0	294	'young ST-HSC'
743	G0	1066	'old LT-HSC(rep)'
744	G0	96	'young LT-HSC'
745	G0	590	'old LT-HSC'
746	G0	983	'old MPP'
747	G0	588	'old LT-HSC'
748	G0	791	'old ST-HSC'
749	G0	1102	'old LT-HSC(rep)'
750	G0	1067	'old LT-HSC(rep)'
751	G0	1292	'old ST-HSC(rep)'
752	G0	813	'old ST-HSC'
753	G0	1234	'old LT-HSC(rep)'
754	G0	628	'old LT-HSC'
755	G0	506	'old LT-HSC'
756	G0	306	'young ST-HSC'
757	G0	591	'old LT-HSC'
758	G0	1205	'old LT-HSC(rep)'
759	G0	805	'old ST-HSC'
760	G0	523	'old LT-HSC'
761	G0	954	'old MPP'
762	G0	87	'young LT-HSC'
763	G0	423	'young MPP'
764	G0	1003	'old MPP'
765	G0	81	'young LT-HSC'
766	G0	1402	'old ST-HSC(rep)'
767	G0	661	'old LT-HSC'
768	G0	15	'young LT-HSC'
769	G0	647	'old LT-HSC'
770	G0	137	'young LT-HSC'
771	G0	190	'young ST-HSC'
772	G0	499	'old LT-HSC'
773	G0	431	'young MPP'
774	G0	657	'old LT-HSC'
775	G0	709	'old ST-HSC'
776	G0	1301	'old ST-HSC(rep)'
777	G0	124	'young LT-HSC'
778	G0	1160	'old LT-HSC(rep)'
779	G0	335	'young MPP'
780	G0	1418	'old ST-HSC(rep)'
781	G0	1088	'old LT-HSC(rep)'
782	G0	117	'young LT-HSC'
783	G0	1206	'old LT-HSC(rep)'
784	G0	44	'young LT-HSC'
785	G0	169	'young ST-HSC'
786	G0	1131	'old LT-HSC(rep)'
787	G0	401	'young MPP'
788	G0	788	'old ST-HSC'
789	G0	1230	'old LT-HSC(rep)'
790	G0	500	'old LT-HSC'
791	G0	382	'young MPP'
792	G0	1101	'old LT-HSC(rep)'
793	G0	1049	'old MPP'
794	G0	1099	'old LT-HSC(rep)'
795	G0	1332	'old ST-HSC(rep)'
796	G0	694	'old ST-HSC'
797	G0	993	'old MPP'
798	G0	1254	'old ST-HSC(rep)'
799	G0	950	'old MPP'
800	G0	736	'old ST-HSC'
801	G0	1081	'old LT-HSC(rep)'
802	G0	1325	'old ST-HSC(rep)'
803	G0	607	'old LT-HSC'
804	G0	1130	'old LT-HSC(rep)'
805	G0	75	'young LT-HSC'
806	G0	1135	'old LT-HSC(rep)'
807	G0	674	'old LT-HSC'
808	G0	1080	'old LT-HSC(rep)'
809	G0	570	'old LT-HSC'
810	G0	167	'young LT-HSC'
811	G0	13	'young LT-HSC'
812	G0	243	'young ST-HSC'
813	G0	54	'young LT-HSC'
814	G0	574	'old LT-HSC'
815	G0	1232	'old LT-HSC(rep)'
816	G0	41	'young LT-HSC'
817	G0	362	'young MPP'
818	G0	687	'old ST-HSC'
819	G0	1117	'old LT-HSC(rep)'
820	G0	1133	'old LT-HSC(rep)'
821	G0	1097	'old LT-HSC(rep)'
822	G0	1199	'old LT-HSC(rep)'
823	G0	831	'old ST-HSC'
824	G0	584	'old LT-HSC'
825	G0	867	'old ST-HSC'
826	G0	1251	'old ST-HSC(rep)'
827	G0	249	'young ST-HSC'
828	G0	601	'old LT-HSC'
829	G0	105	'young LT-HSC'
830	G0	467	'young MPP'
831	G0	1062	'old LT-HSC(rep)'
832	G0	1231	'old LT-HSC(rep)'
833	G0	1340	'old ST-HSC(rep)'
834	G0	148	'young LT-HSC'
835	G0	746	'old ST-HSC'
836	G0	816	'old ST-HSC'
837	G0	747	'old ST-HSC'
838	G0	441	'young MPP'
839	G0	390	'young MPP'
840	G0	707	'old ST-HSC'
841	G0	951	'old MPP'
842	G0	1115	'old LT-HSC(rep)'
843	G0	619	'old LT-HSC'
844	G0	171	'young ST-HSC'
845	G0	1278	'old ST-HSC(rep)'
846	G0	1412	'old ST-HSC(rep)'
847	G0	1327	'old ST-HSC(rep)'
848	G0	526	'old LT-HSC'
849	G0	778	'old ST-HSC'
850	G0	637	'old LT-HSC'
851	G0	1312	'old ST-HSC(rep)'
852	G0	1408	'old ST-HSC(rep)'
853	G0	525	'old LT-HSC'
854	G0	28	'young LT-HSC'
855	G0	72	'young LT-HSC'
856	G0	180	'young ST-HSC'
857	G0	1125	'old LT-HSC(rep)'
858	G0	820	'old ST-HSC'
859	G0	1216	'old LT-HSC(rep)'
860	G0	1371	'old ST-HSC(rep)'
861	G0	943	'old MPP'
862	G0	1060	'old LT-HSC(rep)'
863	G0	153	'young LT-HSC'
864	G0	1024	'old MPP'
865	G0	1191	'old LT-HSC(rep)'
866	G0	1129	'old LT-HSC(rep)'
867	G0	129	'young LT-HSC'
868	G0	1248	'old LT-HSC(rep)'
869	G0	538	'old LT-HSC'
870	G0	1414	'old ST-HSC(rep)'
871	G0	1204	'old LT-HSC(rep)'
872	G0	332	'young MPP'
873	G0	473	'young MPP'
874	G0	562	'old LT-HSC'
875	G0	577	'old LT-HSC'
876	G0	882	'old MPP'
877	G0	34	'young LT-HSC'
878	G0	551	'old LT-HSC'
879	G0	292	'young ST-HSC'
880	G0	1019	'old MPP'
881	G0	702	'old ST-HSC'
882	G0	56	'young LT-HSC'
883	G0	1229	'old LT-HSC(rep)'
884	G0	345	'young MPP'
885	G0	929	'old MPP'
886	G0	772	'old ST-HSC'
887	G0	305	'young ST-HSC'
888	G0	259	'young ST-HSC'
889	G0	1192	'old LT-HSC(rep)'
890	G0	1169	'old LT-HSC(rep)'
891	G0	1149	'old LT-HSC(rep)'
892	G0	1372	'old ST-HSC(rep)'
893	G0	644	'old LT-HSC'
894	G0	1090	'old LT-HSC(rep)'
895	G0	790	'old ST-HSC'
896	G0	553	'old LT-HSC'
897	G0	1429	'old ST-HSC(rep)'
898	G0	849	'old ST-HSC'
899	G0	750	'old ST-HSC'
900	G0	505	'old LT-HSC'
901	G0	671	'old LT-HSC'
902	G0	613	'old LT-HSC'
903	G0	576	'old LT-HSC'
904	G0	1172	'old LT-HSC(rep)'
905	G0	1425	'old ST-HSC(rep)'
906	G0	110	'young LT-HSC'
907	G0	602	'old LT-HSC'
908	G0	347	'young MPP'
909	G0	522	'old LT-HSC'
910	G0	482	'young MPP'
911	G0	988	'old MPP'
912	G0	25	'young LT-HSC'
913	G1(early)	1400	'old ST-HSC(rep)'
914	G1(early)	266	'young ST-HSC'
915	G1(early)	314	'young ST-HSC'
916	G1(early)	353	'young MPP'
917	G1(early)	1375	'old ST-HSC(rep)'
918	G1(early)	812	'old ST-HSC'
919	G1(early)	946	'old MPP'
920	G1(early)	1316	'old ST-HSC(rep)'
921	G1(early)	894	'old MPP'
922	G1(early)	256	'young ST-HSC'
923	G1(early)	614	'old LT-HSC'
924	G1(early)	162	'young LT-HSC'
925	G1(early)	65	'young LT-HSC'
926	G1(early)	567	'old LT-HSC'
927	G1(early)	769	'old ST-HSC'
928	G1(early)	478	'young MPP'
929	G1(early)	273	'young ST-HSC'
930	G1(early)	95	'young LT-HSC'
931	G1(early)	1168	'old LT-HSC(rep)'
932	G1(early)	228	'young ST-HSC'
933	G1(early)	246	'young ST-HSC'
934	G1(early)	409	'young MPP'
935	G1(early)	1377	'old ST-HSC(rep)'
936	G1(early)	651	'old LT-HSC'
937	G1(early)	740	'old ST-HSC'
938	G1(early)	1171	'old LT-HSC(rep)'
939	G1(early)	238	'young ST-HSC'
940	G1(early)	495	'young MPP'
941	G1(early)	311	'young ST-HSC'
942	G1(early)	262	'young ST-HSC'
943	G1(early)	1146	'old LT-HSC(rep)'
944	G1(early)	257	'young ST-HSC'
945	G1(early)	10	'young LT-HSC'
946	G1(early)	1083	'old LT-HSC(rep)'
947	G1(early)	569	'old LT-HSC'
948	G1(early)	1018	'old MPP'
949	G1(early)	250	'young ST-HSC'
950	G1(early)	510	'old LT-HSC'
951	G1(early)	166	'young LT-HSC'
952	G1(early)	275	'young ST-HSC'
953	G1(early)	269	'young ST-HSC'
954	G1(early)	597	'old LT-HSC'
955	G1(early)	913	'old MPP'
956	G1(early)	731	'old ST-HSC'
957	G1(early)	1393	'old ST-HSC(rep)'
958	G1(early)	383	'young MPP'
959	G1(early)	1104	'old LT-HSC(rep)'
960	G1(early)	1085	'old LT-HSC(rep)'
961	G1(early)	357	'young MPP'
962	G1(early)	315	'young ST-HSC'
963	G1(early)	627	'old LT-HSC'
964	G1(early)	689	'old ST-HSC'
965	G1(early)	136	'young LT-HSC'
966	G1(early)	438	'young MPP'
967	G1(early)	170	'young ST-HSC'
968	G1(early)	1007	'old MPP'
969	G1(early)	758	'old ST-HSC'
970	G1(early)	686	'old ST-HSC'
971	G1(early)	1228	'old LT-HSC(rep)'
972	G1(early)	1188	'old LT-HSC(rep)'
973	G1(early)	1050	'old MPP'
974	G1(early)	252	'young ST-HSC'
975	G1(early)	826	'old ST-HSC'
976	G1(early)	692	'old ST-HSC'
977	G1(early)	364	'young MPP'
978	G1(early)	1109	'old LT-HSC(rep)'
979	G1(early)	839	'old ST-HSC'
980	G1(early)	278	'young ST-HSC'
981	G1(early)	1075	'old LT-HSC(rep)'
982	G1(early)	1143	'old LT-HSC(rep)'
983	G1(early)	1354	'old ST-HSC(rep)'
984	G1(early)	158	'young LT-HSC'
985	G1(early)	783	'old ST-HSC'
986	G1(early)	1056	'old MPP'
987	G1(early)	654	'old LT-HSC'
988	G1(early)	174	'young ST-HSC'
989	G1(early)	132	'young LT-HSC'
990	G1(early)	150	'young LT-HSC'
991	G1(early)	931	'old MPP'
992	G1(early)	854	'old ST-HSC'
993	G1(early)	1271	'old ST-HSC(rep)'
994	G1(early)	408	'young MPP'
995	G1(early)	885	'old MPP'
996	G1(early)	639	'old LT-HSC'
997	G1(early)	1173	'old LT-HSC(rep)'
998	G1(early)	1045	'old MPP'
999	G1(early)	1307	'old ST-HSC(rep)'
1000	G1(early)	455	'young MPP'
1001	G1(early)	109	'young LT-HSC'
1002	G1(early)	220	'young ST-HSC'
1003	G1(early)	380	'young MPP'
1004	G1(early)	381	'young MPP'
1005	G1(early)	264	'young ST-HSC'
1006	G1(early)	949	'old MPP'
1007	G1(early)	1053	'old MPP'
1008	G1(early)	436	'young MPP'
1009	G1(early)	186	'young ST-HSC'
1010	G1(early)	437	'young MPP'
1011	G1(early)	342	'young MPP'
1012	G1(early)	518	'old LT-HSC'
1013	G1(early)	934	'old MPP'
1014	G1(early)	1410	'old ST-HSC(rep)'
1015	G1(early)	163	'young LT-HSC'
1016	G1(early)	916	'old MPP'
1017	G1(early)	935	'old MPP'
1018	G1(early)	502	'old LT-HSC'
1019	G1(early)	756	'old ST-HSC'
1020	G1(early)	581	'old LT-HSC'
1021	G1(early)	468	'young MPP'
1022	G1(early)	1059	'old MPP'
1023	G1(early)	393	'young MPP'
1024	G1(early)	414	'young MPP'
1025	G1(early)	999	'old MPP'
1026	G1(early)	752	'old ST-HSC'
1027	G1(early)	239	'young ST-HSC'
1028	G1(early)	360	'young MPP'
1029	G1(early)	923	'old MPP'
1030	G1(early)	858	'old ST-HSC'
1031	G1(early)	1074	'old LT-HSC(rep)'
1032	G1(early)	490	'young MPP'
1033	G1(early)	876	'old MPP'
1034	G1(early)	938	'old MPP'
1035	G1(early)	115	'young LT-HSC'
1036	G1(early)	907	'old MPP'
1037	G1(early)	17	'young LT-HSC'
1038	G1(early)	316	'young ST-HSC'
1039	G1(early)	978	'old MPP'
1040	G1(early)	968	'old MPP'
1041	G1(early)	1240	'old LT-HSC(rep)'
1042	G1(early)	927	'old MPP'
1043	G1(early)	1255	'old ST-HSC(rep)'
1044	G1(early)	203	'young ST-HSC'
1045	G1(late)	1388	'old ST-HSC(rep)'
1046	G1(late)	996	'old MPP'
1047	G1(late)	497	'young MPP'
1048	G1(late)	825	'old ST-HSC'
1049	G1(late)	303	'young ST-HSC'
1050	G1(late)	323	'young ST-HSC'
1051	G1(late)	86	'young LT-HSC'
1052	G1(late)	450	'young MPP'
1053	G1(late)	720	'old ST-HSC'
1054	G1(late)	145	'young LT-HSC'
1055	G1(late)	201	'young ST-HSC'
1056	G1(late)	765	'old ST-HSC'
1057	G1(late)	241	'young ST-HSC'
1058	G1(late)	1346	'old ST-HSC(rep)'
1059	G1(late)	4	'young LT-HSC'
1060	G1(late)	1428	'old ST-HSC(rep)'
1061	G1(late)	860	'old ST-HSC'
1062	G1(late)	49	'young LT-HSC'
1063	G1(late)	247	'young ST-HSC'
1064	G1(late)	1315	'old ST-HSC(rep)'
1065	G1(late)	835	'old ST-HSC'
1066	G1(late)	837	'old ST-HSC'
1067	G1(late)	204	'young ST-HSC'
1068	G1(late)	118	'young LT-HSC'
1069	G1(late)	895	'old MPP'
1070	G1(late)	453	'young MPP'
1071	G1(late)	928	'old MPP'
1072	G1(late)	432	'young MPP'
1073	G1(late)	194	'young ST-HSC'
1074	G1(late)	91	'young LT-HSC'
1075	G1(late)	1358	'old ST-HSC(rep)'
1076	G1(late)	379	'young MPP'
1077	G1(late)	684	'old ST-HSC'
1078	G1(late)	896	'old MPP'
1079	G1(late)	286	'young ST-HSC'
1080	G1(late)	202	'young ST-HSC'
1081	G1(late)	690	'old ST-HSC'
1082	G1(late)	903	'old MPP'
1083	G1(late)	793	'old ST-HSC'
1084	G1(late)	417	'young MPP'
1085	G1(late)	131	'young LT-HSC'
1086	G1(late)	1409	'old ST-HSC(rep)'
1087	G1(late)	289	'young ST-HSC'
1088	G1(late)	439	'young MPP'
1089	G1(late)	365	'young MPP'
1090	G1(late)	161	'young LT-HSC'
1091	G1(late)	1015	'old MPP'
1092	G1(late)	368	'young MPP'
1093	G1(late)	824	'old ST-HSC'
1094	G1(late)	99	'young LT-HSC'
1095	G1(late)	534	'old LT-HSC'
1096	G1(late)	313	'young ST-HSC'
1097	G1(late)	38	'young LT-HSC'
1098	G1(late)	908	'old MPP'
1099	G1(late)	932	'old MPP'
1100	G1(late)	1359	'old ST-HSC(rep)'
1101	G1(late)	970	'old MPP'
1102	G1(late)	425	'young MPP'
1103	G1(late)	930	'old MPP'
1104	G1(late)	985	'old MPP'
1105	G1(late)	6	'young LT-HSC'
1106	G1(late)	1057	'old MPP'
1107	G1(late)	1123	'old LT-HSC(rep)'
1108	G1(late)	1014	'old MPP'
1109	G1(late)	905	'old MPP'
1110	G1(late)	897	'old MPP'
1111	G1(late)	688	'old ST-HSC'
1112	G1(late)	900	'old MPP'
1113	G1(late)	945	'old MPP'
1114	G1(late)	372	'young MPP'
1115	G1(late)	1215	'old LT-HSC(rep)'
1116	G1(late)	1406	'old ST-HSC(rep)'
1117	G1(late)	82	'young LT-HSC'
1118	G1(late)	351	'young MPP'
1119	G1(late)	705	'old ST-HSC'
1120	G1(late)	481	'young MPP'
1121	G1(late)	976	'old MPP'
1122	G1(late)	411	'young MPP'
1123	G1(late)	78	'young LT-HSC'
1124	G1(late)	340	'young MPP'
1125	G1(late)	962	'old MPP'
1126	G1(late)	139	'young LT-HSC'
1127	G1(late)	395	'young MPP'
1128	G1(late)	331	'young MPP'
1129	G1(late)	880	'old MPP'
1130	G1(late)	1042	'old MPP'
1131	G1(late)	586	'old LT-HSC'
1132	G1(late)	406	'young MPP'
1133	G1(late)	336	'young MPP'
1134	G1(late)	997	'old MPP'
1135	G1(late)	920	'old MPP'
1136	G1(late)	459	'young MPP'
1137	G1(late)	16	'young LT-HSC'
1138	G1(late)	337	'young MPP'
1139	G1(late)	5	'young LT-HSC'
1140	G1(late)	77	'young LT-HSC'
1141	G1(late)	1132	'old LT-HSC(rep)'
1142	G1(late)	918	'old MPP'
1143	G1(late)	140	'young LT-HSC'
1144	G1(late)	348	'young MPP'
1145	G1(late)	585	'old LT-HSC'
1146	G1(late)	464	'young MPP'
1147	G1(late)	1005	'old MPP'
1148	G1(late)	1002	'old MPP'
1149	G1(late)	1426	'old ST-HSC(rep)'
1150	G1(late)	341	'young MPP'
1151	G1(late)	1373	'old ST-HSC(rep)'
1152	G1(late)	807	'old ST-HSC'
1153	G1(late)	391	'young MPP'
1154	G1(late)	1313	'old ST-HSC(rep)'
1155	G1(late)	1043	'old MPP'
1156	G1(late)	833	'old ST-HSC'
1157	G1(late)	385	'young MPP'
1158	G1(late)	426	'young MPP'
1159	G1(late)	540	'old LT-HSC'
1160	G1(late)	1357	'old ST-HSC(rep)'
1161	G1(late)	463	'young MPP'
1162	G1(late)	470	'young MPP'
1163	G1(late)	491	'young MPP'
1164	G1(late)	1285	'old ST-HSC(rep)'
1165	G1(late)	27	'young LT-HSC'
1166	G1(late)	972	'old MPP'
1167	G1(late)	1033	'old MPP'
1168	G1(late)	59	'young LT-HSC'
1169	G1(late)	836	'old ST-HSC'
1170	G1(late)	1035	'old MPP'
1171	G1(late)	486	'young MPP'
1172	G1(late)	388	'young MPP'
1173	G1(late)	224	'young ST-HSC'
1174	G1(late)	398	'young MPP'
1175	G1(late)	61	'young LT-HSC'
1176	G1(late)	461	'young MPP'
1177	S	881	'old MPP'
1178	S	70	'young LT-HSC'
1179	S	984	'old MPP'
1180	S	991	'old MPP'
1181	S	21	'young LT-HSC'
1182	S	419	'young MPP'
1183	S	1348	'old ST-HSC(rep)'
1184	S	977	'old MPP'
1185	S	886	'old MPP'
1186	S	921	'old MPP'
1187	S	403	'young MPP'
1188	S	780	'old ST-HSC'
1189	S	933	'old MPP'
1190	S	443	'young MPP'
1191	S	270	'young ST-HSC'
1192	S	435	'young MPP'
1193	S	883	'old MPP'
1194	S	394	'young MPP'
1195	S	446	'young MPP'
1196	S	994	'old MPP'
1197	S	1023	'old MPP'
1198	S	1022	'old MPP'
1199	S	1040	'old MPP'
1200	S	1263	'old ST-HSC(rep)'
1201	S	887	'old MPP'
1202	S	1034	'old MPP'
1203	S	873	'old MPP'
1204	S	1054	'old MPP'
1205	S	958	'old MPP'
1206	S	1183	'old LT-HSC(rep)'
1207	S	449	'young MPP'
1208	S	420	'young MPP'
1209	S	859	'old ST-HSC'
1210	S	1389	'old ST-HSC(rep)'
1211	S	915	'old MPP'
1212	S	874	'old MPP'
1213	S	973	'old MPP'
1214	S	1009	'old MPP'
1215	S	195	'young ST-HSC'
1216	S	389	'young MPP'
1217	S	1041	'old MPP'
1218	S	1383	'old ST-HSC(rep)'
1219	S	1128	'old LT-HSC(rep)'
1220	S	891	'old MPP'
1221	S	458	'young MPP'
1222	S	31	'young LT-HSC'
1223	S	1006	'old MPP'
1224	S	350	'young MPP'
1225	S	498	'young MPP'
1226	S	941	'old MPP'
1227	S	967	'old MPP'
1228	S	942	'old MPP'
1229	S	1029	'old MPP'
1230	S	1044	'old MPP'
1231	S	1012	'old MPP'
1232	S	376	'young MPP'
1233	S	1071	'old LT-HSC(rep)'
1234	S	990	'old MPP'
1235	S	877	'old MPP'
1236	S	427	'young MPP'
1237	S	363	'young MPP'
1238	S	803	'old ST-HSC'
1239	S	901	'old MPP'
1240	S	926	'old MPP'
1241	S	356	'young MPP'
1242	S	11	'young LT-HSC'
1243	S	960	'old MPP'
1244	S	666	'old LT-HSC'
1245	S	483	'young MPP'
1246	S	112	'young LT-HSC'
1247	S	465	'young MPP'
1248	S	402	'young MPP'
1249	S	1030	'old MPP'
1250	S	369	'young MPP'
1251	S	476	'young MPP'
1252	S	396	'young MPP'
1253	S	1157	'old LT-HSC(rep)'
1254	S	410	'young MPP'
1255	S	191	'young ST-HSC'
1256	S	334	'young MPP'
1257	S	404	'young MPP'
1258	G2/M	899	'old MPP'
1259	G2/M	469	'young MPP'
1260	G2/M	326	'young ST-HSC'
1261	G2/M	1245	'old LT-HSC(rep)'
1262	G2/M	531	'old LT-HSC'
1263	G2/M	480	'young MPP'
1264	G2/M	349	'young MPP'
1265	G2/M	361	'young MPP'
1266	G2/M	399	'young MPP'
1267	G2/M	175	'young ST-HSC'
1268	G2/M	515	'old LT-HSC'
1269	G2/M	956	'old MPP'
1270	G2/M	451	'young MPP'
1271	G2/M	1013	'old MPP'
1272	G2/M	343	'young MPP'
1273	G2/M	1207	'old LT-HSC(rep)'
1274	G2/M	424	'young MPP'
1275	G2/M	442	'young MPP'
1276	G2/M	612	'old LT-HSC'
1277	G2/M	898	'old MPP'
1278	G2/M	57	'young LT-HSC'
1279	G2/M	1031	'old MPP'
1280	G2/M	448	'young MPP'
1281	G2/M	387	'young MPP'
1282	G2/M	373	'young MPP'
1283	G2/M	979	'old MPP'
1284	G2/M	280	'young ST-HSC'
1285	G2/M	832	'old ST-HSC'
1286	G2/M	421	'young MPP'
1287	G2/M	429	'young MPP'
1288	G2/M	454	'young MPP'
1289	G2/M	743	'old ST-HSC'
1290	G2/M	1047	'old MPP'
1291	G2/M	980	'old MPP'
1292	G2/M	1028	'old MPP'
1293	G2/M	989	'old MPP'
1294	G2/M	1021	'old MPP'
1295	G2/M	992	'old MPP'
1296	G2/M	407	'young MPP'
1297	G2/M	492	'young MPP'
1298	G2/M	890	'old MPP'
1299	G2/M	1422	'old ST-HSC(rep)'
1300	G2/M	346	'young MPP'
1301	G2/M	339	'young MPP'
1302	G2/M	514	'old LT-HSC'
1303	G2/M	959	'old MPP'
1304	G2/M	24	'young LT-HSC'
1305	G2/M	1020	'old MPP'
1306	G2/M	947	'old MPP'
1307	G2/M	1105	'old LT-HSC(rep)'
1308	G2/M	452	'young MPP'
1309	G2/M	1052	'old MPP'
1310	G2/M	1284	'old ST-HSC(rep)'
1311	G2/M	375	'young MPP'
1312	G2/M	872	'old MPP'
1313	G2/M	1008	'old MPP'
1314	G2/M	904	'old MPP'
1315	G2/M	460	'young MPP'
1316	G2/M	975	'old MPP'
1317	G2/M	151	'young LT-HSC'
1318	G2/M	528	'old LT-HSC'
1319	G2/M	494	'young MPP'
1320	G2/M	1032	'old MPP'
1321	G2/M	1092	'old LT-HSC(rep)'
1322	G2/M	412	'young MPP'
1323	G2/M	963	'old MPP'
1324	G2/M	981	'old MPP'
1325	G2/M	32	'young LT-HSC'
1326	G2/M	922	'old MPP'
1327	G2/M	1403	'old ST-HSC(rep)'
1328	G2/M	172	'young ST-HSC'
1329	G2/M	472	'young MPP'
1330	G2/M	493	'young MPP'
1331	G2/M	135	'young LT-HSC'
1332	G2/M	1001	'old MPP'
1333	G2/M	221	'young ST-HSC'
1334	G2/M	1395	'old ST-HSC(rep)'
1335	G2/M	20	'young LT-HSC'
1336	G2/M	1152	'old LT-HSC(rep)'
1337	G2/M	370	'young MPP'
1338	G2/M	1349	'old ST-HSC(rep)'
1339	G2/M	1036	'old MPP'
1340	G2/M	471	'young MPP'
1341	G2/M	775	'old ST-HSC'
1342	G2/M	953	'old MPP'
1343	G2/M	784	'old ST-HSC'
1344	G2/M	222	'young ST-HSC'
1345	G2/M	544	'old LT-HSC'
1346	G2/M	444	'young MPP'
1347	G2/M	911	'old MPP'
1348	G2/M	64	'young LT-HSC'
1349	G2/M	35	'young LT-HSC'
1350	G2/M	142	'young LT-HSC'
1351	G2/M	245	'young ST-HSC'
1352	G2/M	152	'young LT-HSC'
1353	G2/M	1136	'old LT-HSC(rep)'
1354	G2/M	218	'young ST-HSC'
1355	G2/M	1177	'old LT-HSC(rep)'
1356	G2/M	384	'young MPP'
1357	G2/M	653	'old LT-HSC'
1358	G2/M	1073	'old LT-HSC(rep)'
1359	G2/M	729	'old ST-HSC'
1360	G2/M	1151	'old LT-HSC(rep)'
1361	G2/M	1112	'old LT-HSC(rep)'
1362	G2/M	757	'old ST-HSC'
1363	G2/M	288	'young ST-HSC'
