# Supplementary material for: Single-cell RNA-seq reveals changes in cell cycle and differentiation programs upon aging of hematopoietic stem cells
Source: HighWire-hosted journal article supplement (doi:10.1101/gr.192237.115), 2015-10-01
Supplement: Table_S3.xlsx [file Table_S3.xlsx]

## Sheet: inverse correlation
	Genes inversely correlated in aging and differentiation
1	Nupr1
2	Sult1a1
3	Apoe
4	Clec1a
5	Sdpr
6	Tgm2
7	Adck3
8	Plk2
9	Vwf
10	Clca1
11	Selm
12	Krt18
13	Ehd3
14	Gng11
15	Gm10419
16	Gda
17	Prune2
18	Plscr1
19	Nt5c3
20	Cd63
21	Efna1
22	Aldh1a1
23	Trim47
24	Gas2l3
25	Ppp1r16b
26	Zfp187
27	Runx1t1
28	Gadd45g
29	Slc24a5
30	Nfia
31	Lrrc8a
32	Jam2
33	Chst2
34	Tenc1
35	Slc39a1
36	Itgb3
37	Id2
38	Kdelr2
39	Prss57
40	Lax1
41	Slc12a6
42	Ctss
43	Il15
44	Rab37
45	Thsd1
46	Rgs2
47	Evi2b
48	Eltd1
49	Laptm5
50	Psd4
51	Arhgdib
52	Il16
53	Mgst1
54	Rnase6
55	Rassf5
56	Cd44
57	Lgals1
58	Cux1
59	Slc28a2
60	Anxa6
61	Ctse
62	Gcnt2
63	Cd52
64	Rps6ka1
65	Anxa2
66	Coro7
67	Tmsb10
68	Parvg
69	Cd37
70	Arhgap15
71	Trf
72	Cd27
73	Rfc2
74	Sell
75	Flt3
76	Plac8
77	Cd34

## Sheet: Sheet1
	Genes correlated in aging and differentiation
1	Ctnnal1
