# Supplementary material for: Single-cell RNA-seq reveals changes in cell cycle and differentiation programs upon aging of hematopoietic stem cells
Source: HighWire-hosted journal article supplement (doi:10.1101/gr.192237.115), 2015-10-01
Supplement: Table_S4.xlsx [file Table_S4.xlsx]

## Sheet: Sheet1
gene_set1	gene_set2
Ighv1-30	Ptrf
Dntt	Esam
Flt3	Fabp5
H2afy	Cpa3
Cmah	Mpl
Mef2c	Nipsnap3b
Wfdc17	Gapdh
Dhrs3	Lrrc8a
Mn1	Cd63
Cnn3	Otos
Il1r1	Ndufb2
Satb1	Tbca
Ccdc21	Fen1
Il12a	Shmt2
Lck	Klhl22
Ccl3	Serpina3g
Aip	Ech1
Emb	Rps19
Arhgap11a	Pdlim7
Nit1	Gatad1
Lsp1	Csgalnact1
Gpr97	Rpp21
Mgat1	Sod1
Slc17a5	Vamp5
	Rsph3a
	Rpl5
	Pak1
	Pus7l
	C230062I16Rik
	Sdsl
	Arpc3
	S1pr1
	Nceh1
	Ppp1r16a
	Klf10
	Mrrf
	Prrc2c
	Ncoa4
